# Supplementary material for: GTP Binding Protein Gtr1 Cooperating with ASF1 Regulates Asexual Development in Stemphylium eturmiunum
Source: MDPI journal article supplement (doi:10.3390/ijms23158355), 2022-07-28
Supplement: s1 [file s1]

**Supplementary Table S1. The differentially expressed genes in *SeΔasf1* vs WT-sexual**

| Gene          | <i>SeΔasf1</i> | WT-sexual | Log2<br>(FoldChange) | P-value     | Q-value     |
|---------------|----------------|-----------|----------------------|-------------|-------------|
| TR2615-c0_g1  | 93             | 0         | 7.539158811          | 6.24273E-22 | 2.48E-20    |
| TR17574-c0_g1 | 90             | 0         | 7.491853096          | 2.38181E-21 | 9.14084E-20 |
| TR27799-c0_g1 | 88             | 0         | 7.459431619          | 5.84558E-21 | 2.21342E-19 |
| TR16437-c0_g1 | 86             | 0         | 7.426264755          | 1.44073E-20 | 5.3133E-19  |
| TR9510-c0_g1  | 85             | 0         | 7.409390936          | 2.26548E-20 | 8.28305E-19 |
| TR13441-c0_g1 | 75             | 0         | 7.22881869           | 2.22861E-18 | 7.27242E-17 |
| TR4098-c0_g1  | 74             | 0         | 7.209453366          | 3.54952E-18 | 1.14946E-16 |
| TR9687-c0_g1  | 69             | 0         | 7.108524457          | 3.70826E-17 | 1.14628E-15 |
| TR10557-c0_g1 | 62             | 0         | 6.95419631           | 1.04847E-15 | 2.95612E-14 |
| TR26388-c0_g1 | 122            | 1         | 6.930737338          | 2.08421E-29 | 1.16945E-27 |
| TR13980-c0_g1 | 59             | 0         | 6.882643049          | 4.48857E-15 | 1.23282E-13 |
| TR14126-c0_g1 | 58             | 0         | 6.857980995          | 7.31087E-15 | 1.9698E-13  |
| TR7604-c0_g1  | 58             | 0         | 6.857980995          | 7.31087E-15 | 1.9698E-13  |
| TR26318-c0_g2 | 55             | 0         | 6.781359714          | 3.18965E-14 | 8.16691E-13 |
| TR813-c0_g2   | 54             | 0         | 6.754887502          | 5.22923E-14 | 1.31905E-12 |
| TR27245-c0_g1 | 52             | 0         | 6.700439718          | 1.41272E-13 | 3.47083E-12 |
| TR11027-c0_g1 | 50             | 0         | 6.64385619           | 3.84362E-13 | 9.12663E-12 |
| TR17076-c0_g1 | 50             | 0         | 6.64385619           | 3.84362E-13 | 9.12663E-12 |
| TR813-c0_g1   | 50             | 0         | 6.64385619           | 3.84362E-13 | 9.12663E-12 |
| TR9834-c0_g1  | 50             | 0         | 6.64385619           | 3.84362E-13 | 9.12663E-12 |
| TR25819-c0_g1 | 49             | 0         | 6.614709844          | 6.35721E-13 | 1.4745E-11  |
| TR26318-c0_g1 | 49             | 0         | 6.614709844          | 6.35721E-13 | 1.4745E-11  |
| TR14753-c0_g1 | 48             | 0         | 6.584962501          | 1.05342E-12 | 2.41695E-11 |
| TR26425-c0_g1 | 47             | 0         | 6.554588852          | 1.74889E-12 | 3.94344E-11 |
| TR27245-c0_g3 | 47             | 0         | 6.554588852          | 1.74889E-12 | 3.94344E-11 |
| TR12587-c0_g1 | 45             | 0         | 6.491853096          | 4.84872E-12 | 1.05957E-10 |
| TR13220-c0_g1 | 45             | 0         | 6.491853096          | 4.84872E-12 | 1.05957E-10 |
| TR17332-c0_g1 | 45             | 0         | 6.491853096          | 4.84872E-12 | 1.05957E-10 |
| TR22378-c0_g1 | 45             | 0         | 6.491853096          | 4.84872E-12 | 1.05957E-10 |
| TR13861-c0_g1 | 44             | 0         | 6.459431619          | 8.09774E-12 | 1.73829E-10 |
| TR15544-c0_g1 | 44             | 0         | 6.459431619          | 8.09774E-12 | 1.73829E-10 |
| TR19676-c0_g1 | 43             | 0         | 6.426264755          | 1.35517E-11 | 2.8235E-10  |
| TR27218-c0_g1 | 43             | 0         | 6.426264755          | 1.35517E-11 | 2.8235E-10  |
| TR5122-c0_g1  | 43             | 0         | 6.426264755          | 1.35517E-11 | 2.8235E-10  |
| TR9819-c0_g1  | 43             | 0         | 6.426264755          | 1.35517E-11 | 2.8235E-10  |
| TR10020-c0_g1 | 168            | 2         | 6.392317423          | 8.48464E-41 | 6.67825E-39 |
| TR8142-c0_g1  | 42             | 0         | 6.392317423          | 2.27268E-11 | 4.64965E-10 |
| TR18132-c0_g1 | 41             | 0         | 6.357552005          | 3.81957E-11 | 7.59506E-10 |
| TR372-c0_g1   | 41             | 0         | 6.357552005          | 3.81957E-11 | 7.59506E-10 |
| TR8717-c0_g1  | 41             | 0         | 6.357552005          | 3.81957E-11 | 7.59506E-10 |

|               |     |   |             |             |             |
|---------------|-----|---|-------------|-------------|-------------|
| TR14944-c0_g1 | 40  | 0 | 6.321928095 | 6.43346E-11 | 1.24718E-09 |
| TR17193-c0_g1 | 40  | 0 | 6.321928095 | 6.43346E-11 | 1.24718E-09 |
| TR21155-c0_g1 | 39  | 0 | 6.285402219 | 1.08605E-10 | 2.06305E-09 |
| TR23461-c0_g1 | 39  | 0 | 6.285402219 | 1.08605E-10 | 2.06305E-09 |
| TR25912-c0_g2 | 39  | 0 | 6.285402219 | 1.08605E-10 | 2.06305E-09 |
| TR27102-c0_g1 | 39  | 0 | 6.285402219 | 1.08605E-10 | 2.06305E-09 |
| TR14949-c0_g1 | 228 | 3 | 6.247927513 | 5.83119E-55 | 6.43753E-53 |
| TR14794-c0_g1 | 38  | 0 | 6.247927513 | 1.8376E-10  | 3.40694E-09 |
| TR10026-c0_g1 | 224 | 3 | 6.222392421 | 4.62632E-54 | 4.91585E-52 |
| TR23050-c0_g1 | 37  | 0 | 6.209453366 | 3.11654E-10 | 5.68512E-09 |
| TR8382-c0_g1  | 37  | 0 | 6.209453366 | 3.11654E-10 | 5.68512E-09 |
| TR3245-c0_g1  | 72  | 1 | 6.169925001 | 1.60161E-18 | 5.24652E-17 |
| TR1301-c0_g1  | 36  | 0 | 6.169925001 | 5.29834E-10 | 9.40279E-09 |
| TR25390-c0_g1 | 36  | 0 | 6.169925001 | 5.29834E-10 | 9.40279E-09 |
| TR4665-c0_g1  | 36  | 0 | 6.169925001 | 5.29834E-10 | 9.40279E-09 |
| TR5346-c0_g1  | 36  | 0 | 6.169925001 | 5.29834E-10 | 9.40279E-09 |
| TR8249-c0_g2  | 36  | 0 | 6.169925001 | 5.29834E-10 | 9.40279E-09 |
| TR9834-c0_g2  | 36  | 0 | 6.169925001 | 5.29834E-10 | 9.40279E-09 |
| TR14883-c0_g1 | 35  | 0 | 6.129283017 | 9.02978E-10 | 1.56972E-08 |
| TR17253-c0_g2 | 35  | 0 | 6.129283017 | 9.02978E-10 | 1.56972E-08 |
| TR23153-c0_g1 | 35  | 0 | 6.129283017 | 9.02978E-10 | 1.56972E-08 |
| TR7617-c0_g1  | 69  | 1 | 6.108524457 | 7.79182E-18 | 2.48539E-16 |
| TR25116-c0_g1 | 34  | 0 | 6.087462841 | 1.54281E-09 | 2.58676E-08 |
| TR25116-c0_g2 | 34  | 0 | 6.087462841 | 1.54281E-09 | 2.58676E-08 |
| TR26144-c0_g1 | 34  | 0 | 6.087462841 | 1.54281E-09 | 2.58676E-08 |
| TR12604-c0_g1 | 33  | 0 | 6.044394119 | 2.64285E-09 | 4.30382E-08 |
| TR7953-c0_g1  | 33  | 0 | 6.044394119 | 2.64285E-09 | 4.30382E-08 |
| TR18393-c0_g1 | 32  | 0 | 6           | 4.53928E-09 | 7.21251E-08 |
| TR260-c0_g1   | 32  | 0 | 6           | 4.53928E-09 | 7.21251E-08 |
| TR5517-c0_g1  | 32  | 0 | 6           | 4.53928E-09 | 7.21251E-08 |
| TR9858-c0_g1  | 32  | 0 | 6           | 4.53928E-09 | 7.21251E-08 |
| TR9257-c0_g1  | 62  | 1 | 5.95419631  | 3.25867E-16 | 9.53557E-15 |
| TR4070-c0_g1  | 31  | 0 | 5.95419631  | 7.81788E-09 | 1.20831E-07 |
| TR7982-c0_g1  | 31  | 0 | 5.95419631  | 7.81788E-09 | 1.20831E-07 |
| TR26836-c0_g1 | 123 | 2 | 5.942514505 | 1.33808E-30 | 7.89899E-29 |
| TR6696-c0_g1  | 60  | 1 | 5.906890596 | 9.57637E-16 | 2.71352E-14 |
| TR24769-c0_g1 | 30  | 0 | 5.906890596 | 1.35024E-08 | 2.01898E-07 |
| TR6443-c0_g1  | 30  | 0 | 5.906890596 | 1.35024E-08 | 2.01898E-07 |
| TR22515-c0_g1 | 29  | 0 | 5.857980995 | 2.33875E-08 | 3.41596E-07 |
| TR11944-c0_g1 | 28  | 0 | 5.807354922 | 4.063E-08   | 5.7708E-07  |
| TR22162-c0_g1 | 28  | 0 | 5.807354922 | 4.063E-08   | 5.7708E-07  |
| TR3982-c0_g1  | 28  | 0 | 5.807354922 | 4.063E-08   | 5.7708E-07  |
| TR18804-c0_g1 | 166 | 3 | 5.790076931 | 9.94186E-41 | 7.78916E-39 |
| TR27199-c0_g1 | 165 | 3 | 5.781359714 | 1.70781E-40 | 1.33188E-38 |

|               |    |   |             |             |             |
|---------------|----|---|-------------|-------------|-------------|
| TR17228-c0_g2 | 27 | 0 | 5.754887502 | 7.0801E-08  | 9.62969E-07 |
| TR26574-c0_g1 | 27 | 0 | 5.754887502 | 7.0801E-08  | 9.62969E-07 |
| TR27102-c0_g2 | 27 | 0 | 5.754887502 | 7.0801E-08  | 9.62969E-07 |
| TR14759-c1_g1 | 53 | 1 | 5.727920455 | 4.34578E-14 | 1.10605E-12 |
| TR15887-c0_g1 | 26 | 0 | 5.700439718 | 1.23766E-07 | 1.64261E-06 |
| TR26530-c0_g1 | 26 | 0 | 5.700439718 | 1.23766E-07 | 1.64261E-06 |
| TR11027-c0_g2 | 25 | 0 | 5.64385619  | 2.17058E-07 | 2.78933E-06 |
| TR15603-c0_g1 | 25 | 0 | 5.64385619  | 2.17058E-07 | 2.78933E-06 |
| TR24172-c0_g1 | 25 | 0 | 5.64385619  | 2.17058E-07 | 2.78933E-06 |
| TR4922-c0_g2  | 25 | 0 | 5.64385619  | 2.17058E-07 | 2.78933E-06 |
| TR7513-c0_g1  | 25 | 0 | 5.64385619  | 2.17058E-07 | 2.78933E-06 |
| TR9819-c0_g2  | 25 | 0 | 5.64385619  | 2.17058E-07 | 2.78933E-06 |
| TR26147-c0_g1 | 49 | 1 | 5.614709844 | 3.96599E-13 | 9.40405E-12 |
| TR22378-c0_g2 | 24 | 0 | 5.584962501 | 3.81953E-07 | 4.73648E-06 |
| TR8143-c0_g1  | 24 | 0 | 5.584962501 | 3.81953E-07 | 4.73648E-06 |
| TR8765-c0_g2  | 24 | 0 | 5.584962501 | 3.81953E-07 | 4.73648E-06 |
| TR15995-c0_g1 | 46 | 1 | 5.523561956 | 2.11549E-12 | 4.75742E-11 |
| TR13570-c0_g1 | 23 | 0 | 5.523561956 | 6.74455E-07 | 8.07509E-06 |
| TR21948-c0_g1 | 23 | 0 | 5.523561956 | 6.74455E-07 | 8.07509E-06 |
| TR26215-c0_g1 | 23 | 0 | 5.523561956 | 6.74455E-07 | 8.07509E-06 |
| TR320-c0_g1   | 23 | 0 | 5.523561956 | 6.74455E-07 | 8.07509E-06 |
| TR717-c0_g1   | 23 | 0 | 5.523561956 | 6.74455E-07 | 8.07509E-06 |
| TR2944-c0_g1  | 45 | 1 | 5.491853096 | 3.70779E-12 | 8.17605E-11 |
| TR16877-c0_g1 | 44 | 1 | 5.459431619 | 6.50895E-12 | 1.4079E-10  |
| TR12524-c0_g1 | 22 | 0 | 5.459431619 | 1.19524E-06 | 1.36472E-05 |
| TR13134-c0_g1 | 22 | 0 | 5.459431619 | 1.19524E-06 | 1.36472E-05 |
| TR14559-c0_g1 | 22 | 0 | 5.459431619 | 1.19524E-06 | 1.36472E-05 |
| TR17253-c0_g1 | 22 | 0 | 5.459431619 | 1.19524E-06 | 1.36472E-05 |
| TR22955-c0_g1 | 22 | 0 | 5.459431619 | 1.19524E-06 | 1.36472E-05 |
| TR25733-c0_g1 | 22 | 0 | 5.459431619 | 1.19524E-06 | 1.36472E-05 |
| TR26963-c0_g1 | 22 | 0 | 5.459431619 | 1.19524E-06 | 1.36472E-05 |
| TR346-c0_g1   | 22 | 0 | 5.459431619 | 1.19524E-06 | 1.36472E-05 |
| TR10581-c0_g2 | 42 | 1 | 5.392317423 | 2.01565E-11 | 4.13373E-10 |
| TR11504-c0_g1 | 42 | 1 | 5.392317423 | 2.01565E-11 | 4.13373E-10 |
| TR18440-c0_g1 | 42 | 1 | 5.392317423 | 2.01565E-11 | 4.13373E-10 |
| TR23950-c0_g1 | 42 | 1 | 5.392317423 | 2.01565E-11 | 4.13373E-10 |
| TR14746-c0_g1 | 21 | 0 | 5.392317423 | 2.12606E-06 | 2.32449E-05 |
| TR17127-c0_g2 | 21 | 0 | 5.392317423 | 2.12606E-06 | 2.32449E-05 |
| TR21420-c0_g1 | 21 | 0 | 5.392317423 | 2.12606E-06 | 2.32449E-05 |
| TR25912-c0_g1 | 21 | 0 | 5.392317423 | 2.12606E-06 | 2.32449E-05 |
| TR27739-c0_g1 | 21 | 0 | 5.392317423 | 2.12606E-06 | 2.32449E-05 |
| TR5243-c0_g1  | 21 | 0 | 5.392317423 | 2.12606E-06 | 2.32449E-05 |
| TR7237-c0_g1  | 21 | 0 | 5.392317423 | 2.12606E-06 | 2.32449E-05 |
| TR9063-c0_g2  | 21 | 0 | 5.392317423 | 2.12606E-06 | 2.32449E-05 |

|               |     |    |             |             |             |
|---------------|-----|----|-------------|-------------|-------------|
| TR9714-c0_g1  | 21  | 0  | 5.392317423 | 2.12606E-06 | 2.32449E-05 |
| TR10581-c0_g1 | 41  | 1  | 5.357552005 | 3.55583E-11 | 7.1206E-10  |
| TR3404-c0_g1  | 361 | 9  | 5.325930025 | 7.07253E-86 | 1.29293E-83 |
| TR11504-c0_g2 | 40  | 1  | 5.321928095 | 6.28346E-11 | 1.22088E-09 |
| TR24263-c0_g1 | 40  | 1  | 5.321928095 | 6.28346E-11 | 1.22088E-09 |
| TR10887-c0_g1 | 20  | 0  | 5.321928095 | 3.79642E-06 | 3.9842E-05  |
| TR13759-c0_g1 | 20  | 0  | 5.321928095 | 3.79642E-06 | 3.9842E-05  |
| TR19042-c0_g1 | 20  | 0  | 5.321928095 | 3.79642E-06 | 3.9842E-05  |
| TR24172-c0_g3 | 20  | 0  | 5.321928095 | 3.79642E-06 | 3.9842E-05  |
| TR3542-c0_g1  | 20  | 0  | 5.321928095 | 3.79642E-06 | 3.9842E-05  |
| TR5346-c0_g2  | 20  | 0  | 5.321928095 | 3.79642E-06 | 3.9842E-05  |
| TR6213-c0_g1  | 588 | 15 | 5.292781749 | 1.622E-138  | 4.5206E-136 |
| TR18751-c0_g1 | 39  | 1  | 5.285402219 | 1.11224E-10 | 2.11044E-09 |
| TR4153-c0_g1  | 76  | 2  | 5.247927513 | 2.26989E-19 | 7.87575E-18 |
| TR3395-c0_g1  | 38  | 1  | 5.247927513 | 1.97218E-10 | 3.6485E-09  |
| TR10131-c0_g1 | 19  | 0  | 5.247927513 | 6.80635E-06 | 6.87155E-05 |
| TR10283-c1_g1 | 19  | 0  | 5.247927513 | 6.80635E-06 | 6.87155E-05 |
| TR15576-c0_g1 | 19  | 0  | 5.247927513 | 6.80635E-06 | 6.87155E-05 |
| TR22265-c0_g1 | 19  | 0  | 5.247927513 | 6.80635E-06 | 6.87155E-05 |
| TR24689-c0_g1 | 19  | 0  | 5.247927513 | 6.80635E-06 | 6.87155E-05 |
| TR26730-c0_g7 | 19  | 0  | 5.247927513 | 6.80635E-06 | 6.87155E-05 |
| TR4922-c0_g1  | 19  | 0  | 5.247927513 | 6.80635E-06 | 6.87155E-05 |
| TR22788-c0_g1 | 373 | 10 | 5.221103725 | 2.327E-88   | 4.49569E-86 |
| TR966-c0_g1   | 371 | 10 | 5.213347282 | 7.17482E-88 | 1.34045E-85 |
| TR3425-c0_g1  | 37  | 1  | 5.209453366 | 3.50315E-10 | 6.37668E-09 |
| TR21419-c0_g1 | 36  | 1  | 5.169925001 | 6.23365E-10 | 1.09824E-08 |
| TR23361-c0_g5 | 18  | 0  | 5.169925001 | 1.22537E-05 | 0.000117967 |
| TR25390-c0_g2 | 18  | 0  | 5.169925001 | 1.22537E-05 | 0.000117967 |
| TR26215-c0_g2 | 18  | 0  | 5.169925001 | 1.22537E-05 | 0.000117967 |
| TR26923-c0_g1 | 18  | 0  | 5.169925001 | 1.22537E-05 | 0.000117967 |
| TR27753-c0_g1 | 18  | 0  | 5.169925001 | 1.22537E-05 | 0.000117967 |
| TR3963-c0_g1  | 18  | 0  | 5.169925001 | 1.22537E-05 | 0.000117967 |
| TR5517-c0_g2  | 18  | 0  | 5.169925001 | 1.22537E-05 | 0.000117967 |
| TR8765-c0_g1  | 18  | 0  | 5.169925001 | 1.22537E-05 | 0.000117967 |
| TR9063-c0_g1  | 18  | 0  | 5.169925001 | 1.22537E-05 | 0.000117967 |
| TR24531-c0_g1 | 70  | 2  | 5.129283017 | 6.92045E-18 | 2.21576E-16 |
| TR20312-c0_g1 | 139 | 4  | 5.118941073 | 6.57389E-34 | 4.36581E-32 |
| TR15870-c0_g1 | 34  | 1  | 5.087462841 | 1.98459E-09 | 3.28536E-08 |
| TR26957-c0_g1 | 34  | 1  | 5.087462841 | 1.98459E-09 | 3.28536E-08 |
| TR14910-c0_g1 | 17  | 0  | 5.087462841 | 2.21569E-05 | 0.000203399 |
| TR15563-c0_g1 | 17  | 0  | 5.087462841 | 2.21569E-05 | 0.000203399 |
| TR15578-c0_g1 | 17  | 0  | 5.087462841 | 2.21569E-05 | 0.000203399 |
| TR26215-c0_g3 | 17  | 0  | 5.087462841 | 2.21569E-05 | 0.000203399 |
| TR5415-c0_g1  | 17  | 0  | 5.087462841 | 2.21569E-05 | 0.000203399 |

|               |     |   |             |             |             |
|---------------|-----|---|-------------|-------------|-------------|
| TR8717-c0_g2  | 17  | 0 | 5.087462841 | 2.21569E-05 | 0.000203399 |
| TR8765-c0_g3  | 17  | 0 | 5.087462841 | 2.21569E-05 | 0.000203399 |
| TR9146-c0_g1  | 17  | 0 | 5.087462841 | 2.21569E-05 | 0.000203399 |
| TR18454-c0_g1 | 67  | 2 | 5.06608919  | 3.86279E-17 | 1.19188E-15 |
| TR19907-c0_g1 | 33  | 1 | 5.044394119 | 3.55089E-09 | 5.70604E-08 |
| TR21047-c0_g1 | 33  | 1 | 5.044394119 | 3.55089E-09 | 5.70604E-08 |
| TR3016-c0_g1  | 33  | 1 | 5.044394119 | 3.55089E-09 | 5.70604E-08 |
| TR8070-c0_g1  | 33  | 1 | 5.044394119 | 3.55089E-09 | 5.70604E-08 |
| TR13662-c0_g1 | 161 | 5 | 5.008988783 | 8.42398E-39 | 6.22691E-37 |
| TR18723-c0_g1 | 32  | 1 | 5           | 6.36532E-09 | 9.92834E-08 |
| TR10096-c0_g1 | 16  | 0 | 5           | 4.02458E-05 | 0.000348564 |
| TR10323-c1_g1 | 16  | 0 | 5           | 4.02458E-05 | 0.000348564 |
| TR1144-c0_g1  | 16  | 0 | 5           | 4.02458E-05 | 0.000348564 |
| TR12096-c0_g1 | 16  | 0 | 5           | 4.02458E-05 | 0.000348564 |
| TR15901-c0_g1 | 16  | 0 | 5           | 4.02458E-05 | 0.000348564 |
| TR1723-c0_g1  | 16  | 0 | 5           | 4.02458E-05 | 0.000348564 |
| TR18574-c0_g1 | 16  | 0 | 5           | 4.02458E-05 | 0.000348564 |
| TR20766-c0_g2 | 16  | 0 | 5           | 4.02458E-05 | 0.000348564 |
| TR22373-c0_g1 | 16  | 0 | 5           | 4.02458E-05 | 0.000348564 |
| TR24873-c0_g1 | 16  | 0 | 5           | 4.02458E-05 | 0.000348564 |
| TR26992-c0_g1 | 16  | 0 | 5           | 4.02458E-05 | 0.000348564 |
| TR4367-c0_g1  | 16  | 0 | 5           | 4.02458E-05 | 0.000348564 |
| TR5776-c0_g1  | 16  | 0 | 5           | 4.02458E-05 | 0.000348564 |
| TR6064-c0_g1  | 16  | 0 | 5           | 4.02458E-05 | 0.000348564 |
| TR9776-c0_g1  | 16  | 0 | 5           | 4.02458E-05 | 0.000348564 |
| TR5331-c0_g1  | 63  | 2 | 4.977279923 | 3.86851E-16 | 1.12813E-14 |
| TR12818-c0_g1 | 157 | 5 | 4.972692654 | 8.31159E-38 | 6.09087E-36 |
| TR10021-c0_g1 | 125 | 4 | 4.965784285 | 1.95631E-30 | 1.14295E-28 |
| TR11143-c0_g1 | 31  | 1 | 4.95419631  | 1.14322E-08 | 1.72921E-07 |
| TR3458-c0_g1  | 31  | 1 | 4.95419631  | 1.14322E-08 | 1.72921E-07 |
| TR10323-c1_g2 | 15  | 0 | 4.906890596 | 7.34503E-05 | 0.000596633 |
| TR10486-c0_g1 | 15  | 0 | 4.906890596 | 7.34503E-05 | 0.000596633 |
| TR1701-c0_g1  | 15  | 0 | 4.906890596 | 7.34503E-05 | 0.000596633 |
| TR1723-c0_g2  | 15  | 0 | 4.906890596 | 7.34503E-05 | 0.000596633 |
| TR19390-c0_g1 | 15  | 0 | 4.906890596 | 7.34503E-05 | 0.000596633 |
| TR22688-c0_g1 | 15  | 0 | 4.906890596 | 7.34503E-05 | 0.000596633 |
| TR23323-c0_g1 | 15  | 0 | 4.906890596 | 7.34503E-05 | 0.000596633 |
| TR23527-c0_g3 | 15  | 0 | 4.906890596 | 7.34503E-05 | 0.000596633 |
| TR24994-c0_g1 | 15  | 0 | 4.906890596 | 7.34503E-05 | 0.000596633 |
| TR25859-c0_g1 | 15  | 0 | 4.906890596 | 7.34503E-05 | 0.000596633 |
| TR4266-c0_g1  | 15  | 0 | 4.906890596 | 7.34503E-05 | 0.000596633 |
| TR6528-c0_g1  | 15  | 0 | 4.906890596 | 7.34503E-05 | 0.000596633 |
| TR6664-c0_g1  | 15  | 0 | 4.906890596 | 7.34503E-05 | 0.000596633 |
| TR8264-c0_g4  | 15  | 0 | 4.906890596 | 7.34503E-05 | 0.000596633 |

|               |     |   |             |             |             |
|---------------|-----|---|-------------|-------------|-------------|
| TR971-c0_g1   | 15  | 0 | 4.906890596 | 7.34503E-05 | 0.000596633 |
| TR5850-c0_g1  | 29  | 1 | 4.857980995 | 3.70916E-08 | 5.30814E-07 |
| TR26349-c0_g1 | 114 | 4 | 4.832890014 | 1.10427E-27 | 5.83047E-26 |
| TR18233-c0_g1 | 85  | 3 | 4.824428435 | 4.84027E-21 | 1.84924E-19 |
| TR26282-c0_g3 | 28  | 1 | 4.807354922 | 6.7009E-08  | 9.15789E-07 |
| TR11766-c0_g2 | 14  | 0 | 4.807354922 | 0.000134718 | 0.001031243 |
| TR13279-c0_g1 | 14  | 0 | 4.807354922 | 0.000134718 | 0.001031243 |
| TR14077-c0_g1 | 14  | 0 | 4.807354922 | 0.000134718 | 0.001031243 |
| TR15167-c0_g1 | 14  | 0 | 4.807354922 | 0.000134718 | 0.001031243 |
| TR15230-c0_g3 | 14  | 0 | 4.807354922 | 0.000134718 | 0.001031243 |
| TR17569-c0_g1 | 14  | 0 | 4.807354922 | 0.000134718 | 0.001031243 |
| TR18877-c0_g1 | 14  | 0 | 4.807354922 | 0.000134718 | 0.001031243 |
| TR20561-c0_g1 | 14  | 0 | 4.807354922 | 0.000134718 | 0.001031243 |
| TR20991-c0_g1 | 14  | 0 | 4.807354922 | 0.000134718 | 0.001031243 |
| TR23265-c0_g3 | 14  | 0 | 4.807354922 | 0.000134718 | 0.001031243 |
| TR24661-c0_g1 | 14  | 0 | 4.807354922 | 0.000134718 | 0.001031243 |
| TR26699-c0_g1 | 14  | 0 | 4.807354922 | 0.000134718 | 0.001031243 |
| TR26730-c0_g5 | 14  | 0 | 4.807354922 | 0.000134718 | 0.001031243 |
| TR2688-c0_g1  | 14  | 0 | 4.807354922 | 0.000134718 | 0.001031243 |
| TR27393-c0_g1 | 14  | 0 | 4.807354922 | 0.000134718 | 0.001031243 |
| TR3914-c0_g1  | 14  | 0 | 4.807354922 | 0.000134718 | 0.001031243 |
| TR4364-c0_g1  | 14  | 0 | 4.807354922 | 0.000134718 | 0.001031243 |
| TR5760-c0_g1  | 14  | 0 | 4.807354922 | 0.000134718 | 0.001031243 |
| TR5850-c0_g2  | 14  | 0 | 4.807354922 | 0.000134718 | 0.001031243 |
| TR6091-c0_g1  | 14  | 0 | 4.807354922 | 0.000134718 | 0.001031243 |
| TR8264-c0_g5  | 14  | 0 | 4.807354922 | 0.000134718 | 0.001031243 |
| TR8446-c0_g1  | 14  | 0 | 4.807354922 | 0.000134718 | 0.001031243 |
| TR8829-c0_g1  | 14  | 0 | 4.807354922 | 0.000134718 | 0.001031243 |
| TR8958-c0_g1  | 14  | 0 | 4.807354922 | 0.000134718 | 0.001031243 |
| TR7721-c0_g1  | 53  | 2 | 4.727920455 | 1.30086E-13 | 3.21459E-12 |
| TR11887-c0_g2 | 26  | 1 | 4.700439718 | 2.20022E-07 | 2.81677E-06 |
| TR18262-c0_g1 | 26  | 1 | 4.700439718 | 2.20022E-07 | 2.81677E-06 |
| TR8119-c0_g1  | 26  | 1 | 4.700439718 | 2.20022E-07 | 2.81677E-06 |
| TR12338-c0_g4 | 13  | 0 | 4.700439718 | 0.000248387 | 0.001784075 |
| TR13705-c0_g1 | 13  | 0 | 4.700439718 | 0.000248387 | 0.001784075 |
| TR15791-c0_g1 | 13  | 0 | 4.700439718 | 0.000248387 | 0.001784075 |
| TR17055-c0_g1 | 13  | 0 | 4.700439718 | 0.000248387 | 0.001784075 |
| TR17235-c0_g1 | 13  | 0 | 4.700439718 | 0.000248387 | 0.001784075 |
| TR18372-c0_g1 | 13  | 0 | 4.700439718 | 0.000248387 | 0.001784075 |
| TR19202-c0_g1 | 13  | 0 | 4.700439718 | 0.000248387 | 0.001784075 |
| TR20028-c0_g1 | 13  | 0 | 4.700439718 | 0.000248387 | 0.001784075 |
| TR20237-c0_g2 | 13  | 0 | 4.700439718 | 0.000248387 | 0.001784075 |
| TR22130-c0_g1 | 13  | 0 | 4.700439718 | 0.000248387 | 0.001784075 |
| TR22808-c0_g1 | 13  | 0 | 4.700439718 | 0.000248387 | 0.001784075 |

|               |    |   |             |             |             |
|---------------|----|---|-------------|-------------|-------------|
| TR22870-c0_g1 | 13 | 0 | 4.700439718 | 0.000248387 | 0.001784075 |
| TR23457-c0_g1 | 13 | 0 | 4.700439718 | 0.000248387 | 0.001784075 |
| TR23894-c0_g1 | 13 | 0 | 4.700439718 | 0.000248387 | 0.001784075 |
| TR25192-c0_g1 | 13 | 0 | 4.700439718 | 0.000248387 | 0.001784075 |
| TR25209-c0_g1 | 13 | 0 | 4.700439718 | 0.000248387 | 0.001784075 |
| TR25422-c0_g1 | 13 | 0 | 4.700439718 | 0.000248387 | 0.001784075 |
| TR26730-c0_g4 | 13 | 0 | 4.700439718 | 0.000248387 | 0.001784075 |
| TR26730-c0_g8 | 13 | 0 | 4.700439718 | 0.000248387 | 0.001784075 |
| TR2720-c0_g1  | 13 | 0 | 4.700439718 | 0.000248387 | 0.001784075 |
| TR27220-c0_g1 | 13 | 0 | 4.700439718 | 0.000248387 | 0.001784075 |
| TR27653-c0_g1 | 13 | 0 | 4.700439718 | 0.000248387 | 0.001784075 |
| TR27883-c0_g2 | 13 | 0 | 4.700439718 | 0.000248387 | 0.001784075 |
| TR2852-c0_g1  | 13 | 0 | 4.700439718 | 0.000248387 | 0.001784075 |
| TR3616-c0_g1  | 13 | 0 | 4.700439718 | 0.000248387 | 0.001784075 |
| TR4622-c0_g1  | 13 | 0 | 4.700439718 | 0.000248387 | 0.001784075 |
| TR5958-c0_g1  | 13 | 0 | 4.700439718 | 0.000248387 | 0.001784075 |
| TR6643-c0_g1  | 13 | 0 | 4.700439718 | 0.000248387 | 0.001784075 |
| TR7905-c0_g1  | 13 | 0 | 4.700439718 | 0.000248387 | 0.001784075 |
| TR8181-c0_g10 | 13 | 0 | 4.700439718 | 0.000248387 | 0.001784075 |
| TR8993-c0_g1  | 13 | 0 | 4.700439718 | 0.000248387 | 0.001784075 |
| TR9146-c0_g2  | 13 | 0 | 4.700439718 | 0.000248387 | 0.001784075 |
| TR9833-c0_g1  | 13 | 0 | 4.700439718 | 0.000248387 | 0.001784075 |
| TR1006-c0_g1  | 76 | 3 | 4.662965013 | 9.12359E-19 | 3.02955E-17 |
| TR17566-c0_g1 | 76 | 3 | 4.662965013 | 9.12359E-19 | 3.02955E-17 |
| TR3456-c0_g1  | 76 | 3 | 4.662965013 | 9.12359E-19 | 3.02955E-17 |
| TR14134-c0_g1 | 25 | 1 | 4.64385619  | 3.99911E-07 | 4.94114E-06 |
| TR14722-c0_g1 | 25 | 1 | 4.64385619  | 3.99911E-07 | 4.94114E-06 |
| TR20625-c0_g1 | 25 | 1 | 4.64385619  | 3.99911E-07 | 4.94114E-06 |
| TR8006-c0_g2  | 49 | 2 | 4.614709844 | 1.36442E-12 | 3.11369E-11 |
| TR611-c0_g1   | 96 | 4 | 4.584962501 | 3.86556E-23 | 1.61473E-21 |
| TR13063-c0_g1 | 24 | 1 | 4.584962501 | 7.28378E-07 | 8.62181E-06 |
| TR15987-c0_g1 | 24 | 1 | 4.584962501 | 7.28378E-07 | 8.62181E-06 |
| TR1864-c0_g1  | 24 | 1 | 4.584962501 | 7.28378E-07 | 8.62181E-06 |
| TR14562-c0_g1 | 12 | 0 | 4.584962501 | 0.000460489 | 0.003071373 |
| TR15244-c0_g1 | 12 | 0 | 4.584962501 | 0.000460489 | 0.003071373 |
| TR17079-c0_g1 | 12 | 0 | 4.584962501 | 0.000460489 | 0.003071373 |
| TR17127-c0_g3 | 12 | 0 | 4.584962501 | 0.000460489 | 0.003071373 |
| TR17276-c0_g1 | 12 | 0 | 4.584962501 | 0.000460489 | 0.003071373 |
| TR17555-c0_g1 | 12 | 0 | 4.584962501 | 0.000460489 | 0.003071373 |
| TR18614-c0_g2 | 12 | 0 | 4.584962501 | 0.000460489 | 0.003071373 |
| TR198-c0_g1   | 12 | 0 | 4.584962501 | 0.000460489 | 0.003071373 |
| TR21628-c0_g1 | 12 | 0 | 4.584962501 | 0.000460489 | 0.003071373 |
| TR22712-c0_g1 | 12 | 0 | 4.584962501 | 0.000460489 | 0.003071373 |
| TR23257-c0_g1 | 12 | 0 | 4.584962501 | 0.000460489 | 0.003071373 |

|               |     |    |             |             |             |
|---------------|-----|----|-------------|-------------|-------------|
| TR23264-c0_g1 | 12  | 0  | 4.584962501 | 0.000460489 | 0.003071373 |
| TR23312-c0_g1 | 12  | 0  | 4.584962501 | 0.000460489 | 0.003071373 |
| TR24642-c0_g1 | 12  | 0  | 4.584962501 | 0.000460489 | 0.003071373 |
| TR24756-c0_g1 | 12  | 0  | 4.584962501 | 0.000460489 | 0.003071373 |
| TR25097-c0_g1 | 12  | 0  | 4.584962501 | 0.000460489 | 0.003071373 |
| TR25421-c0_g2 | 12  | 0  | 4.584962501 | 0.000460489 | 0.003071373 |
| TR25786-c0_g1 | 12  | 0  | 4.584962501 | 0.000460489 | 0.003071373 |
| TR26317-c0_g2 | 12  | 0  | 4.584962501 | 0.000460489 | 0.003071373 |
| TR26733-c0_g1 | 12  | 0  | 4.584962501 | 0.000460489 | 0.003071373 |
| TR26951-c0_g1 | 12  | 0  | 4.584962501 | 0.000460489 | 0.003071373 |
| TR27178-c0_g1 | 12  | 0  | 4.584962501 | 0.000460489 | 0.003071373 |
| TR27718-c0_g1 | 12  | 0  | 4.584962501 | 0.000460489 | 0.003071373 |
| TR3239-c0_g2  | 12  | 0  | 4.584962501 | 0.000460489 | 0.003071373 |
| TR3496-c0_g1  | 12  | 0  | 4.584962501 | 0.000460489 | 0.003071373 |
| TR5752-c0_g1  | 12  | 0  | 4.584962501 | 0.000460489 | 0.003071373 |
| TR6592-c0_g1  | 12  | 0  | 4.584962501 | 0.000460489 | 0.003071373 |
| TR717-c0_g2   | 12  | 0  | 4.584962501 | 0.000460489 | 0.003071373 |
| TR7436-c0_g1  | 12  | 0  | 4.584962501 | 0.000460489 | 0.003071373 |
| TR750-c0_g1   | 12  | 0  | 4.584962501 | 0.000460489 | 0.003071373 |
| TR8185-c1_g1  | 12  | 0  | 4.584962501 | 0.000460489 | 0.003071373 |
| TR8603-c0_g1  | 12  | 0  | 4.584962501 | 0.000460489 | 0.003071373 |
| TR9938-c0_g1  | 12  | 0  | 4.584962501 | 0.000460489 | 0.003071373 |
| TR22022-c0_g1 | 238 | 10 | 4.572889668 | 8.34159E-55 | 9.09091E-53 |
| TR12586-c0_g1 | 71  | 3  | 4.564784619 | 1.70521E-17 | 5.34886E-16 |
| TR13243-c0_g1 | 328 | 14 | 4.550197083 | 1.10553E-74 | 1.67817E-72 |
| TR10509-c0_g1 | 117 | 5  | 4.548436625 | 9.3599E-28  | 4.95734E-26 |
| TR12159-c0_g1 | 69  | 3  | 4.523561956 | 5.51924E-17 | 1.67277E-15 |
| TR14803-c0_g1 | 23  | 1  | 4.523561956 | 1.3294E-06  | 1.49778E-05 |
| TR25536-c0_g1 | 23  | 1  | 4.523561956 | 1.3294E-06  | 1.49778E-05 |
| TR7245-c0_g1  | 23  | 1  | 4.523561956 | 1.3294E-06  | 1.49778E-05 |
| TR8889-c0_g1  | 23  | 1  | 4.523561956 | 1.3294E-06  | 1.49778E-05 |
| TR22976-c0_g1 | 316 | 14 | 4.496425826 | 1.18645E-71 | 1.72404E-69 |
| TR20368-c0_g1 | 67  | 3  | 4.48112669  | 1.78973E-16 | 5.31954E-15 |
| TR15012-c0_g1 | 156 | 7  | 4.478047297 | 3.3062E-36  | 2.36175E-34 |
| TR18838-c0_g1 | 89  | 4  | 4.475733431 | 2.33077E-21 | 8.96521E-20 |
| TR2704-c0_g2  | 66  | 3  | 4.459431619 | 3.22506E-16 | 9.45349E-15 |
| TR2742-c0_g1  | 22  | 1  | 4.459431619 | 2.43145E-06 | 2.63634E-05 |
| TR3863-c0_g1  | 22  | 1  | 4.459431619 | 2.43145E-06 | 2.63634E-05 |
| TR10131-c0_g2 | 11  | 0  | 4.459431619 | 0.000858686 | 0.005274132 |
| TR10171-c0_g1 | 11  | 0  | 4.459431619 | 0.000858686 | 0.005274132 |
| TR1065-c0_g1  | 11  | 0  | 4.459431619 | 0.000858686 | 0.005274132 |
| TR10872-c0_g1 | 11  | 0  | 4.459431619 | 0.000858686 | 0.005274132 |
| TR10990-c0_g1 | 11  | 0  | 4.459431619 | 0.000858686 | 0.005274132 |
| TR11766-c0_g1 | 11  | 0  | 4.459431619 | 0.000858686 | 0.005274132 |



|               |     |   |             |             |             |
|---------------|-----|---|-------------|-------------|-------------|
| TR12679-c0_g1 | 11  | 0 | 4.459431619 | 0.000858686 | 0.005274132 |
| TR14077-c0_g2 | 11  | 0 | 4.459431619 | 0.000858686 | 0.005274132 |
| TR14720-c0_g2 | 11  | 0 | 4.459431619 | 0.000858686 | 0.005274132 |
| TR15981-c0_g1 | 11  | 0 | 4.459431619 | 0.000858686 | 0.005274132 |
| TR17347-c0_g1 | 11  | 0 | 4.459431619 | 0.000858686 | 0.005274132 |
| TR17421-c0_g1 | 11  | 0 | 4.459431619 | 0.000858686 | 0.005274132 |
| TR17747-c0_g1 | 11  | 0 | 4.459431619 | 0.000858686 | 0.005274132 |
| TR18018-c0_g1 | 11  | 0 | 4.459431619 | 0.000858686 | 0.005274132 |
| TR20049-c0_g1 | 11  | 0 | 4.459431619 | 0.000858686 | 0.005274132 |
| TR21087-c0_g1 | 11  | 0 | 4.459431619 | 0.000858686 | 0.005274132 |
| TR21087-c0_g2 | 11  | 0 | 4.459431619 | 0.000858686 | 0.005274132 |
| TR21200-c0_g1 | 11  | 0 | 4.459431619 | 0.000858686 | 0.005274132 |
| TR21428-c0_g1 | 11  | 0 | 4.459431619 | 0.000858686 | 0.005274132 |
| TR21813-c0_g1 | 11  | 0 | 4.459431619 | 0.000858686 | 0.005274132 |
| TR21957-c0_g1 | 11  | 0 | 4.459431619 | 0.000858686 | 0.005274132 |
| TR23024-c0_g1 | 11  | 0 | 4.459431619 | 0.000858686 | 0.005274132 |
| TR23110-c0_g3 | 11  | 0 | 4.459431619 | 0.000858686 | 0.005274132 |
| TR23500-c1_g1 | 11  | 0 | 4.459431619 | 0.000858686 | 0.005274132 |
| TR24507-c0_g1 | 11  | 0 | 4.459431619 | 0.000858686 | 0.005274132 |
| TR25097-c0_g2 | 11  | 0 | 4.459431619 | 0.000858686 | 0.005274132 |
| TR26283-c0_g2 | 11  | 0 | 4.459431619 | 0.000858686 | 0.005274132 |
| TR27021-c0_g1 | 11  | 0 | 4.459431619 | 0.000858686 | 0.005274132 |
| TR2765-c0_g3  | 11  | 0 | 4.459431619 | 0.000858686 | 0.005274132 |
| TR2893-c0_g1  | 11  | 0 | 4.459431619 | 0.000858686 | 0.005274132 |
| TR3511-c0_g1  | 11  | 0 | 4.459431619 | 0.000858686 | 0.005274132 |
| TR3854-c1_g1  | 11  | 0 | 4.459431619 | 0.000858686 | 0.005274132 |
| TR3921-c0_g1  | 11  | 0 | 4.459431619 | 0.000858686 | 0.005274132 |
| TR3982-c2_g1  | 11  | 0 | 4.459431619 | 0.000858686 | 0.005274132 |
| TR4541-c0_g1  | 11  | 0 | 4.459431619 | 0.000858686 | 0.005274132 |
| TR4728-c0_g1  | 11  | 0 | 4.459431619 | 0.000858686 | 0.005274132 |
| TR4745-c0_g1  | 11  | 0 | 4.459431619 | 0.000858686 | 0.005274132 |
| TR5104-c0_g1  | 11  | 0 | 4.459431619 | 0.000858686 | 0.005274132 |
| TR527-c0_g1   | 11  | 0 | 4.459431619 | 0.000858686 | 0.005274132 |
| TR5415-c0_g2  | 11  | 0 | 4.459431619 | 0.000858686 | 0.005274132 |
| TR5835-c0_g1  | 11  | 0 | 4.459431619 | 0.000858686 | 0.005274132 |
| TR5961-c0_g1  | 11  | 0 | 4.459431619 | 0.000858686 | 0.005274132 |
| TR6529-c0_g1  | 11  | 0 | 4.459431619 | 0.000858686 | 0.005274132 |
| TR7356-c0_g2  | 11  | 0 | 4.459431619 | 0.000858686 | 0.005274132 |
| TR753-c0_g2   | 11  | 0 | 4.459431619 | 0.000858686 | 0.005274132 |
| TR8181-c0_g2  | 11  | 0 | 4.459431619 | 0.000858686 | 0.005274132 |
| TR23624-c0_g1 | 175 | 8 | 4.451211112 | 2.66804E-40 | 2.03409E-38 |
| TR895-c0_g1   | 87  | 4 | 4.442943496 | 7.54048E-21 | 2.82375E-19 |
| TR12534-c0_g1 | 65  | 3 | 4.437405312 | 5.81408E-16 | 1.67822E-14 |
| TR27611-c0_g1 | 65  | 3 | 4.437405312 | 5.81408E-16 | 1.67822E-14 |

|               |      |    |             |             |             |
|---------------|------|----|-------------|-------------|-------------|
| TR842-c0_g1   | 43   | 2  | 4.426264755 | 4.748E-11   | 9.34286E-10 |
| TR20320-c2_g1 | 1180 | 56 | 4.397216222 | 1.5016E-259 | 9.4555E-257 |
| TR15689-c0_g1 | 147  | 7  | 4.392317423 | 6.38034E-34 | 4.25389E-32 |
| TR26177-c0_g1 | 42   | 2  | 4.392317423 | 8.60237E-11 | 1.64884E-09 |
| TR4887-c0_g2  | 42   | 2  | 4.392317423 | 8.60237E-11 | 1.64884E-09 |
| TR11557-c0_g1 | 21   | 1  | 4.392317423 | 4.45646E-06 | 4.61986E-05 |
| TR12683-c0_g1 | 21   | 1  | 4.392317423 | 4.45646E-06 | 4.61986E-05 |
| TR24844-c0_g1 | 21   | 1  | 4.392317423 | 4.45646E-06 | 4.61986E-05 |
| TR7955-c0_g1  | 21   | 1  | 4.392317423 | 4.45646E-06 | 4.61986E-05 |
| TR11184-c0_g1 | 712  | 34 | 4.38827059  | 2.9523E-157 | 9.8418E-155 |
| TR625-c0_g1   | 82   | 4  | 4.357552005 | 1.42693E-19 | 5.00201E-18 |
| TR842-c0_g2   | 41   | 2  | 4.357552005 | 1.55973E-10 | 2.91081E-09 |
| TR15481-c0_g1 | 81   | 4  | 4.339850003 | 2.57142E-19 | 8.88567E-18 |
| TR22237-c0_g1 | 80   | 4  | 4.321928095 | 4.63508E-19 | 1.57921E-17 |
| TR4887-c0_g1  | 40   | 2  | 4.321928095 | 2.83007E-10 | 5.19599E-09 |
| TR15679-c0_g1 | 20   | 1  | 4.321928095 | 8.18526E-06 | 8.12852E-05 |
| TR11058-c1_g1 | 10   | 0  | 4.321928095 | 0.001611108 | 0.009106037 |
| TR11928-c0_g1 | 10   | 0  | 4.321928095 | 0.001611108 | 0.009106037 |
| TR12210-c0_g1 | 10   | 0  | 4.321928095 | 0.001611108 | 0.009106037 |
| TR1355-c0_g1  | 10   | 0  | 4.321928095 | 0.001611108 | 0.009106037 |
| TR13720-c0_g1 | 10   | 0  | 4.321928095 | 0.001611108 | 0.009106037 |
| TR14241-c0_g1 | 10   | 0  | 4.321928095 | 0.001611108 | 0.009106037 |
| TR15082-c0_g1 | 10   | 0  | 4.321928095 | 0.001611108 | 0.009106037 |
| TR15631-c0_g1 | 10   | 0  | 4.321928095 | 0.001611108 | 0.009106037 |
| TR16486-c0_g1 | 10   | 0  | 4.321928095 | 0.001611108 | 0.009106037 |
| TR16498-c0_g1 | 10   | 0  | 4.321928095 | 0.001611108 | 0.009106037 |
| TR16948-c0_g1 | 10   | 0  | 4.321928095 | 0.001611108 | 0.009106037 |
| TR19133-c0_g1 | 10   | 0  | 4.321928095 | 0.001611108 | 0.009106037 |
| TR19573-c1_g1 | 10   | 0  | 4.321928095 | 0.001611108 | 0.009106037 |
| TR19820-c0_g1 | 10   | 0  | 4.321928095 | 0.001611108 | 0.009106037 |
| TR20034-c0_g1 | 10   | 0  | 4.321928095 | 0.001611108 | 0.009106037 |
| TR212-c0_g1   | 10   | 0  | 4.321928095 | 0.001611108 | 0.009106037 |
| TR21464-c0_g3 | 10   | 0  | 4.321928095 | 0.001611108 | 0.009106037 |
| TR21644-c0_g2 | 10   | 0  | 4.321928095 | 0.001611108 | 0.009106037 |
| TR23110-c0_g1 | 10   | 0  | 4.321928095 | 0.001611108 | 0.009106037 |
| TR23197-c0_g1 | 10   | 0  | 4.321928095 | 0.001611108 | 0.009106037 |
| TR2333-c0_g1  | 10   | 0  | 4.321928095 | 0.001611108 | 0.009106037 |
| TR23379-c0_g1 | 10   | 0  | 4.321928095 | 0.001611108 | 0.009106037 |
| TR24046-c0_g1 | 10   | 0  | 4.321928095 | 0.001611108 | 0.009106037 |
| TR24914-c0_g1 | 10   | 0  | 4.321928095 | 0.001611108 | 0.009106037 |
| TR25246-c0_g1 | 10   | 0  | 4.321928095 | 0.001611108 | 0.009106037 |
| TR26022-c0_g1 | 10   | 0  | 4.321928095 | 0.001611108 | 0.009106037 |
| TR26317-c0_g1 | 10   | 0  | 4.321928095 | 0.001611108 | 0.009106037 |
| TR26337-c0_g1 | 10   | 0  | 4.321928095 | 0.001611108 | 0.009106037 |

|               |     |    |             |             |             |
|---------------|-----|----|-------------|-------------|-------------|
| TR27386-c0_g1 | 10  | 0  | 4.321928095 | 0.001611108 | 0.009106037 |
| TR27883-c0_g1 | 10  | 0  | 4.321928095 | 0.001611108 | 0.009106037 |
| TR4591-c0_g2  | 10  | 0  | 4.321928095 | 0.001611108 | 0.009106037 |
| TR4859-c0_g1  | 10  | 0  | 4.321928095 | 0.001611108 | 0.009106037 |
| TR5191-c0_g1  | 10  | 0  | 4.321928095 | 0.001611108 | 0.009106037 |
| TR5364-c1_g1  | 10  | 0  | 4.321928095 | 0.001611108 | 0.009106037 |
| TR5821-c0_g2  | 10  | 0  | 4.321928095 | 0.001611108 | 0.009106037 |
| TR5917-c0_g1  | 10  | 0  | 4.321928095 | 0.001611108 | 0.009106037 |
| TR6685-c0_g1  | 10  | 0  | 4.321928095 | 0.001611108 | 0.009106037 |
| TR753-c0_g1   | 10  | 0  | 4.321928095 | 0.001611108 | 0.009106037 |
| TR90-c0_g2    | 10  | 0  | 4.321928095 | 0.001611108 | 0.009106037 |
| TR9180-c0_g1  | 10  | 0  | 4.321928095 | 0.001611108 | 0.009106037 |
| TR9572-c0_g1  | 10  | 0  | 4.321928095 | 0.001611108 | 0.009106037 |
| TR9655-c0_g2  | 10  | 0  | 4.321928095 | 0.001611108 | 0.009106037 |
| TR20352-c0_g1 | 705 | 36 | 4.291554446 | 5.1781E-154 | 1.6303E-151 |
| TR8516-c0_g1  | 117 | 6  | 4.285402219 | 5.06205E-27 | 2.55375E-25 |
| TR9354-c0_g2  | 39  | 2  | 4.285402219 | 5.1387E-10  | 9.17697E-09 |
| TR10737-c0_g1 | 19  | 1  | 4.247927513 | 1.50658E-05 | 0.000142616 |
| TR11286-c0_g1 | 19  | 1  | 4.247927513 | 1.50658E-05 | 0.000142616 |
| TR18430-c0_g1 | 19  | 1  | 4.247927513 | 1.50658E-05 | 0.000142616 |
| TR2782-c0_g2  | 19  | 1  | 4.247927513 | 1.50658E-05 | 0.000142616 |
| TR90-c0_g1    | 19  | 1  | 4.247927513 | 1.50658E-05 | 0.000142616 |
| TR9328-c0_g1  | 19  | 1  | 4.247927513 | 1.50658E-05 | 0.000142616 |
| TR7542-c0_g1  | 493 | 26 | 4.245004118 | 1.1206E-107 | 2.352E-105  |
| TR10161-c0_g1 | 604 | 32 | 4.238404739 | 2.2537E-131 | 5.8054E-129 |
| TR5649-c0_g1  | 93  | 5  | 4.217230716 | 1.22374E-21 | 4.78279E-20 |
| TR14545-c0_g1 | 130 | 7  | 4.215012891 | 1.36394E-29 | 7.70392E-28 |
| TR14914-c0_g1 | 464 | 25 | 4.214124805 | 4.6095E-101 | 9.3295E-99  |
| TR12313-c0_g1 | 147 | 8  | 4.199672345 | 3.5305E-33  | 2.29096E-31 |
| TR13280-c0_g1 | 90  | 5  | 4.169925001 | 7.17063E-21 | 2.69117E-19 |
| TR7098-c0_g1  | 36  | 2  | 4.169925001 | 3.08878E-09 | 5.00605E-08 |
| TR15645-c0_g1 | 18  | 1  | 4.169925001 | 2.77885E-05 | 0.000249705 |
| TR18201-c0_g1 | 18  | 1  | 4.169925001 | 2.77885E-05 | 0.000249705 |
| TR22383-c0_g1 | 18  | 1  | 4.169925001 | 2.77885E-05 | 0.000249705 |
| TR22612-c0_g2 | 18  | 1  | 4.169925001 | 2.77885E-05 | 0.000249705 |
| TR5523-c0_g2  | 18  | 1  | 4.169925001 | 2.77885E-05 | 0.000249705 |
| TR5657-c0_g1  | 18  | 1  | 4.169925001 | 2.77885E-05 | 0.000249705 |
| TR786-c0_g1   | 18  | 1  | 4.169925001 | 2.77885E-05 | 0.000249705 |
| TR8806-c0_g1  | 18  | 1  | 4.169925001 | 2.77885E-05 | 0.000249705 |
| TR10000-c0_g1 | 9   | 0  | 4.169925001 | 0.003042725 | 0.015332054 |
| TR10171-c0_g2 | 9   | 0  | 4.169925001 | 0.003042725 | 0.015332054 |
| TR10427-c0_g1 | 9   | 0  | 4.169925001 | 0.003042725 | 0.015332054 |
| TR10610-c0_g1 | 9   | 0  | 4.169925001 | 0.003042725 | 0.015332054 |
| TR11382-c0_g1 | 9   | 0  | 4.169925001 | 0.003042725 | 0.015332054 |

|               |   |   |             |             |             |
|---------------|---|---|-------------|-------------|-------------|
| TR11439-c0_g1 | 9 | 0 | 4.169925001 | 0.003042725 | 0.015332054 |
| TR11537-c0_g1 | 9 | 0 | 4.169925001 | 0.003042725 | 0.015332054 |
| TR12182-c0_g1 | 9 | 0 | 4.169925001 | 0.003042725 | 0.015332054 |
| TR12206-c0_g1 | 9 | 0 | 4.169925001 | 0.003042725 | 0.015332054 |
| TR13-c0_g1    | 9 | 0 | 4.169925001 | 0.003042725 | 0.015332054 |
| TR13675-c0_g1 | 9 | 0 | 4.169925001 | 0.003042725 | 0.015332054 |
| TR14285-c0_g1 | 9 | 0 | 4.169925001 | 0.003042725 | 0.015332054 |
| TR14666-c0_g1 | 9 | 0 | 4.169925001 | 0.003042725 | 0.015332054 |
| TR14666-c0_g2 | 9 | 0 | 4.169925001 | 0.003042725 | 0.015332054 |
| TR15230-c0_g1 | 9 | 0 | 4.169925001 | 0.003042725 | 0.015332054 |
| TR15230-c0_g2 | 9 | 0 | 4.169925001 | 0.003042725 | 0.015332054 |
| TR16112-c0_g1 | 9 | 0 | 4.169925001 | 0.003042725 | 0.015332054 |
| TR16538-c0_g1 | 9 | 0 | 4.169925001 | 0.003042725 | 0.015332054 |
| TR16600-c0_g1 | 9 | 0 | 4.169925001 | 0.003042725 | 0.015332054 |
| TR16984-c0_g1 | 9 | 0 | 4.169925001 | 0.003042725 | 0.015332054 |
| TR17127-c0_g1 | 9 | 0 | 4.169925001 | 0.003042725 | 0.015332054 |
| TR18102-c0_g1 | 9 | 0 | 4.169925001 | 0.003042725 | 0.015332054 |
| TR18214-c0_g1 | 9 | 0 | 4.169925001 | 0.003042725 | 0.015332054 |
| TR18417-c0_g1 | 9 | 0 | 4.169925001 | 0.003042725 | 0.015332054 |
| TR18608-c0_g1 | 9 | 0 | 4.169925001 | 0.003042725 | 0.015332054 |
| TR18719-c0_g1 | 9 | 0 | 4.169925001 | 0.003042725 | 0.015332054 |
| TR19016-c0_g2 | 9 | 0 | 4.169925001 | 0.003042725 | 0.015332054 |
| TR19557-c0_g8 | 9 | 0 | 4.169925001 | 0.003042725 | 0.015332054 |
| TR19900-c0_g1 | 9 | 0 | 4.169925001 | 0.003042725 | 0.015332054 |
| TR2091-c0_g1  | 9 | 0 | 4.169925001 | 0.003042725 | 0.015332054 |
| TR23621-c0_g1 | 9 | 0 | 4.169925001 | 0.003042725 | 0.015332054 |
| TR23656-c0_g1 | 9 | 0 | 4.169925001 | 0.003042725 | 0.015332054 |
| TR23691-c0_g2 | 9 | 0 | 4.169925001 | 0.003042725 | 0.015332054 |
| TR24914-c0_g2 | 9 | 0 | 4.169925001 | 0.003042725 | 0.015332054 |
| TR25859-c0_g2 | 9 | 0 | 4.169925001 | 0.003042725 | 0.015332054 |
| TR26283-c0_g1 | 9 | 0 | 4.169925001 | 0.003042725 | 0.015332054 |
| TR26381-c0_g1 | 9 | 0 | 4.169925001 | 0.003042725 | 0.015332054 |
| TR27208-c0_g1 | 9 | 0 | 4.169925001 | 0.003042725 | 0.015332054 |
| TR27474-c2_g1 | 9 | 0 | 4.169925001 | 0.003042725 | 0.015332054 |
| TR2749-c0_g3  | 9 | 0 | 4.169925001 | 0.003042725 | 0.015332054 |
| TR27567-c0_g1 | 9 | 0 | 4.169925001 | 0.003042725 | 0.015332054 |
| TR27704-c0_g3 | 9 | 0 | 4.169925001 | 0.003042725 | 0.015332054 |
| TR3149-c0_g1  | 9 | 0 | 4.169925001 | 0.003042725 | 0.015332054 |
| TR3188-c0_g1  | 9 | 0 | 4.169925001 | 0.003042725 | 0.015332054 |
| TR3459-c0_g1  | 9 | 0 | 4.169925001 | 0.003042725 | 0.015332054 |
| TR42-c0_g1    | 9 | 0 | 4.169925001 | 0.003042725 | 0.015332054 |
| TR4700-c0_g1  | 9 | 0 | 4.169925001 | 0.003042725 | 0.015332054 |
| TR5045-c0_g1  | 9 | 0 | 4.169925001 | 0.003042725 | 0.015332054 |
| TR5140-c0_g1  | 9 | 0 | 4.169925001 | 0.003042725 | 0.015332054 |

|               |     |    |             |             |             |
|---------------|-----|----|-------------|-------------|-------------|
| TR5335-c0_g1  | 9   | 0  | 4.169925001 | 0.003042725 | 0.015332054 |
| TR5711-c0_g1  | 9   | 0  | 4.169925001 | 0.003042725 | 0.015332054 |
| TR6731-c0_g2  | 9   | 0  | 4.169925001 | 0.003042725 | 0.015332054 |
| TR6984-c0_g1  | 9   | 0  | 4.169925001 | 0.003042725 | 0.015332054 |
| TR7327-c0_g1  | 9   | 0  | 4.169925001 | 0.003042725 | 0.015332054 |
| TR8974-c0_g1  | 9   | 0  | 4.169925001 | 0.003042725 | 0.015332054 |
| TR9511-c0_g1  | 9   | 0  | 4.169925001 | 0.003042725 | 0.015332054 |
| TR9636-c0_g1  | 9   | 0  | 4.169925001 | 0.003042725 | 0.015332054 |
| TR9636-c0_g2  | 9   | 0  | 4.169925001 | 0.003042725 | 0.015332054 |
| TR9672-c0_g1  | 9   | 0  | 4.169925001 | 0.003042725 | 0.015332054 |
| TR2894-c0_g2  | 539 | 30 | 4.167250867 | 2.2627E-116 | 5.3429E-114 |
| TR1048-c0_g1  | 53  | 3  | 4.142957954 | 7.06989E-13 | 1.63757E-11 |
| TR7132-c0_g1  | 35  | 2  | 4.129283017 | 5.6232E-09  | 8.82749E-08 |
| TR18163-c0_g1 | 52  | 3  | 4.115477217 | 1.28074E-12 | 2.92665E-11 |
| TR1489-c0_g2  | 34  | 2  | 4.087462841 | 1.02431E-08 | 1.56045E-07 |
| TR13261-c0_g1 | 17  | 1  | 4.087462841 | 5.1362E-05  | 0.000433146 |
| TR21231-c0_g1 | 17  | 1  | 4.087462841 | 5.1362E-05  | 0.000433146 |
| TR22216-c0_g1 | 17  | 1  | 4.087462841 | 5.1362E-05  | 0.000433146 |
| TR25132-c0_g1 | 17  | 1  | 4.087462841 | 5.1362E-05  | 0.000433146 |
| TR27088-c0_g1 | 17  | 1  | 4.087462841 | 5.1362E-05  | 0.000433146 |
| TR2742-c0_g2  | 17  | 1  | 4.087462841 | 5.1362E-05  | 0.000433146 |
| TR3831-c0_g1  | 17  | 1  | 4.087462841 | 5.1362E-05  | 0.000433146 |
| TR5900-c0_g1  | 17  | 1  | 4.087462841 | 5.1362E-05  | 0.000433146 |
| TR2699-c0_g2  | 67  | 4  | 4.06608919  | 1.00342E-15 | 2.83381E-14 |
| TR24851-c0_g1 | 99  | 6  | 4.044394119 | 2.01515E-22 | 8.11854E-21 |
| TR6730-c0_g1  | 33  | 2  | 4.044394119 | 1.86689E-08 | 2.75517E-07 |
| TR15479-c0_g1 | 49  | 3  | 4.029747343 | 7.62548E-12 | 1.64522E-10 |
| TR2699-c0_g1  | 81  | 5  | 4.017921908 | 1.45153E-18 | 4.78255E-17 |
| TR2704-c0_g1  | 80  | 5  | 4           | 2.61962E-18 | 8.5157E-17  |
| TR13986-c0_g1 | 48  | 3  | 4           | 1.38268E-11 | 2.87026E-10 |
| TR15635-c0_g1 | 48  | 3  | 4           | 1.38268E-11 | 2.87026E-10 |
| TR12972-c0_g3 | 32  | 2  | 4           | 3.40428E-08 | 4.89655E-07 |
| TR1489-c0_g1  | 32  | 2  | 4           | 3.40428E-08 | 4.89655E-07 |
| TR14935-c0_g1 | 32  | 2  | 4           | 3.40428E-08 | 4.89655E-07 |
| TR927-c0_g1   | 32  | 2  | 4           | 3.40428E-08 | 4.89655E-07 |
| TR14258-c0_g1 | 16  | 1  | 4           | 9.51281E-05 | 0.000757753 |
| TR17111-c0_g1 | 16  | 1  | 4           | 9.51281E-05 | 0.000757753 |
| TR188-c0_g1   | 16  | 1  | 4           | 9.51281E-05 | 0.000757753 |
| TR3247-c0_g1  | 16  | 1  | 4           | 9.51281E-05 | 0.000757753 |
| TR5763-c0_g1  | 16  | 1  | 4           | 9.51281E-05 | 0.000757753 |
| TR14776-c0_g1 | 47  | 3  | 3.969626351 | 2.50757E-11 | 5.10563E-10 |
| TR5911-c0_g1  | 47  | 3  | 3.969626351 | 2.50757E-11 | 5.10563E-10 |
| TR7098-c0_g2  | 31  | 2  | 3.95419631  | 6.21057E-08 | 8.58802E-07 |
| TR5269-c0_g1  | 122 | 8  | 3.930737338 | 8.44413E-27 | 4.18547E-25 |

|               |      |     |             |             |             |
|---------------|------|-----|-------------|-------------|-------------|
| TR8581-c0_g1  | 406  | 27  | 3.910448415 | 7.5284E-85  | 1.34729E-82 |
| TR16020-c0_g1 | 30   | 2   | 3.906890596 | 1.13348E-07 | 1.50788E-06 |
| TR6154-c0_g1  | 30   | 2   | 3.906890596 | 1.13348E-07 | 1.50788E-06 |
| TR1143-c0_g1  | 15   | 1   | 3.906890596 | 0.00017654  | 0.001318142 |
| TR12711-c0_g2 | 15   | 1   | 3.906890596 | 0.00017654  | 0.001318142 |
| TR20105-c0_g1 | 15   | 1   | 3.906890596 | 0.00017654  | 0.001318142 |
| TR2091-c0_g2  | 15   | 1   | 3.906890596 | 0.00017654  | 0.001318142 |
| TR22946-c0_g1 | 15   | 1   | 3.906890596 | 0.00017654  | 0.001318142 |
| TR6156-c0_g1  | 15   | 1   | 3.906890596 | 0.00017654  | 0.001318142 |
| TR6391-c0_g1  | 15   | 1   | 3.906890596 | 0.00017654  | 0.001318142 |
| TR839-c0_g1   | 15   | 1   | 3.906890596 | 0.00017654  | 0.001318142 |
| TR18436-c0_g1 | 44   | 3   | 3.874469118 | 1.49681E-10 | 2.79645E-09 |
| TR15497-c0_g1 | 131  | 9   | 3.863498    | 2.37963E-28 | 1.27624E-26 |
| TR22915-c0_g1 | 160  | 11  | 3.862496476 | 3.00064E-34 | 2.0164E-32  |
| TR21278-c0_g1 | 28   | 2   | 3.807354922 | 3.77927E-07 | 4.71405E-06 |
| TR10155-c0_g1 | 14   | 1   | 3.807354922 | 0.000328256 | 0.002301372 |
| TR14402-c0_g1 | 14   | 1   | 3.807354922 | 0.000328256 | 0.002301372 |
| TR14506-c0_g1 | 14   | 1   | 3.807354922 | 0.000328256 | 0.002301372 |
| TR16038-c0_g1 | 14   | 1   | 3.807354922 | 0.000328256 | 0.002301372 |
| TR16186-c0_g1 | 14   | 1   | 3.807354922 | 0.000328256 | 0.002301372 |
| TR16674-c0_g1 | 14   | 1   | 3.807354922 | 0.000328256 | 0.002301372 |
| TR19555-c0_g1 | 14   | 1   | 3.807354922 | 0.000328256 | 0.002301372 |
| TR22274-c0_g1 | 14   | 1   | 3.807354922 | 0.000328256 | 0.002301372 |
| TR22691-c0_g1 | 14   | 1   | 3.807354922 | 0.000328256 | 0.002301372 |
| TR23552-c0_g1 | 14   | 1   | 3.807354922 | 0.000328256 | 0.002301372 |
| TR23644-c0_g1 | 14   | 1   | 3.807354922 | 0.000328256 | 0.002301372 |
| TR6232-c0_g1  | 14   | 1   | 3.807354922 | 0.000328256 | 0.002301372 |
| TR9027-c0_g1  | 251  | 18  | 3.801618553 | 3.43825E-52 | 3.45887E-50 |
| TR1938-c0_g1  | 41   | 3   | 3.772589504 | 8.93798E-10 | 1.55854E-08 |
| TR10605-c0_g3 | 27   | 2   | 3.754887502 | 6.90328E-07 | 8.21884E-06 |
| TR12122-c1_g1 | 27   | 2   | 3.754887502 | 6.90328E-07 | 8.21884E-06 |
| TR12886-c0_g1 | 27   | 2   | 3.754887502 | 6.90328E-07 | 8.21884E-06 |
| TR13957-c0_g1 | 27   | 2   | 3.754887502 | 6.90328E-07 | 8.21884E-06 |
| TR14772-c0_g1 | 27   | 2   | 3.754887502 | 6.90328E-07 | 8.21884E-06 |
| TR22612-c0_g1 | 27   | 2   | 3.754887502 | 6.90328E-07 | 8.21884E-06 |
| TR4560-c0_g3  | 27   | 2   | 3.754887502 | 6.90328E-07 | 8.21884E-06 |
| TR10549-c0_g1 | 160  | 12  | 3.736965594 | 1.63737E-33 | 1.06657E-31 |
| TR5826-c0_g2  | 80   | 6   | 3.736965594 | 1.45916E-17 | 4.59401E-16 |
| TR19951-c0_g1 | 40   | 3   | 3.736965594 | 1.62137E-09 | 2.70781E-08 |
| TR8264-c0_g9  | 4325 | 326 | 3.729756263 | 0           | 0           |
| TR2579-c5_g1  | 670  | 51  | 3.715591943 | 4.8219E-134 | 1.2809E-131 |
| TR7780-c0_g1  | 65   | 5   | 3.700439718 | 1.83161E-14 | 4.76144E-13 |
| TR537-c0_g1   | 39   | 3   | 3.700439718 | 2.94082E-09 | 4.78448E-08 |
| TR26712-c1_g1 | 26   | 2   | 3.700439718 | 1.26112E-06 | 1.43034E-05 |

|               |     |    |             |             |             |
|---------------|-----|----|-------------|-------------|-------------|
| TR5431-c0_g1  | 26  | 2  | 3.700439718 | 1.26112E-06 | 1.43034E-05 |
| TR8106-c0_g1  | 26  | 2  | 3.700439718 | 1.26112E-06 | 1.43034E-05 |
| TR870-c0_g1   | 26  | 2  | 3.700439718 | 1.26112E-06 | 1.43034E-05 |
| TR16233-c0_g2 | 13  | 1  | 3.700439718 | 0.000611466 | 0.003949748 |
| TR18031-c0_g1 | 13  | 1  | 3.700439718 | 0.000611466 | 0.003949748 |
| TR1811-c0_g1  | 13  | 1  | 3.700439718 | 0.000611466 | 0.003949748 |
| TR20681-c0_g1 | 13  | 1  | 3.700439718 | 0.000611466 | 0.003949748 |
| TR21303-c0_g2 | 13  | 1  | 3.700439718 | 0.000611466 | 0.003949748 |
| TR25240-c0_g1 | 13  | 1  | 3.700439718 | 0.000611466 | 0.003949748 |
| TR26880-c1_g1 | 13  | 1  | 3.700439718 | 0.000611466 | 0.003949748 |
| TR27646-c0_g1 | 13  | 1  | 3.700439718 | 0.000611466 | 0.003949748 |
| TR27707-c0_g2 | 13  | 1  | 3.700439718 | 0.000611466 | 0.003949748 |
| TR2848-c0_g1  | 13  | 1  | 3.700439718 | 0.000611466 | 0.003949748 |
| TR5523-c0_g1  | 13  | 1  | 3.700439718 | 0.000611466 | 0.003949748 |
| TR6017-c0_g1  | 13  | 1  | 3.700439718 | 0.000611466 | 0.003949748 |
| TR71-c0_g1    | 13  | 1  | 3.700439718 | 0.000611466 | 0.003949748 |
| TR8314-c0_g2  | 13  | 1  | 3.700439718 | 0.000611466 | 0.003949748 |
| TR997-c0_g1   | 13  | 1  | 3.700439718 | 0.000611466 | 0.003949748 |
| TR12859-c6_g1 | 673 | 52 | 3.694022976 | 4.4776E-134 | 1.2083E-131 |
| TR25215-c0_g1 | 38  | 3  | 3.662965013 | 5.333E-09   | 8.38742E-08 |
| TR27791-c0_g1 | 38  | 3  | 3.662965013 | 5.333E-09   | 8.38742E-08 |
| TR4117-c0_g1  | 38  | 3  | 3.662965013 | 5.333E-09   | 8.38742E-08 |
| TR7217-c0_g1  | 38  | 3  | 3.662965013 | 5.333E-09   | 8.38742E-08 |
| TR17623-c0_g1 | 202 | 16 | 3.658211483 | 3.05671E-41 | 2.41712E-39 |
| TR13621-c0_g1 | 25  | 2  | 3.64385619  | 2.30394E-06 | 2.50287E-05 |
| TR19698-c0_g1 | 25  | 2  | 3.64385619  | 2.30394E-06 | 2.50287E-05 |
| TR20825-c0_g1 | 25  | 2  | 3.64385619  | 2.30394E-06 | 2.50287E-05 |
| TR3346-c0_g1  | 25  | 2  | 3.64385619  | 2.30394E-06 | 2.50287E-05 |
| TR870-c0_g2   | 25  | 2  | 3.64385619  | 2.30394E-06 | 2.50287E-05 |
| TR923-c0_g1   | 25  | 2  | 3.64385619  | 2.30394E-06 | 2.50287E-05 |
| TR21965-c0_g1 | 37  | 3  | 3.624490865 | 9.66866E-09 | 1.47426E-07 |
| TR22232-c0_g1 | 37  | 3  | 3.624490865 | 9.66866E-09 | 1.47426E-07 |
| TR3265-c0_g1  | 37  | 3  | 3.624490865 | 9.66866E-09 | 1.47426E-07 |
| TR623-c0_g1   | 37  | 3  | 3.624490865 | 9.66866E-09 | 1.47426E-07 |
| TR9354-c0_g1  | 37  | 3  | 3.624490865 | 9.66866E-09 | 1.47426E-07 |
| TR24223-c0_g1 | 49  | 4  | 3.614709844 | 4.26013E-11 | 8.45133E-10 |
| TR7682-c0_g1  | 193 | 16 | 3.592457037 | 5.73116E-39 | 4.27357E-37 |
| TR7284-c0_g1  | 60  | 5  | 3.584962501 | 3.47526E-13 | 8.3217E-12  |
| TR1878-c0_g1  | 36  | 3  | 3.584962501 | 1.75237E-08 | 2.59066E-07 |
| TR10978-c0_g1 | 24  | 2  | 3.584962501 | 4.20869E-06 | 4.37636E-05 |
| TR10978-c0_g2 | 24  | 2  | 3.584962501 | 4.20869E-06 | 4.37636E-05 |
| TR27553-c0_g1 | 24  | 2  | 3.584962501 | 4.20869E-06 | 4.37636E-05 |
| TR4925-c0_g1  | 24  | 2  | 3.584962501 | 4.20869E-06 | 4.37636E-05 |
| TR5431-c0_g2  | 24  | 2  | 3.584962501 | 4.20869E-06 | 4.37636E-05 |

|               |       |      |             |             |             |
|---------------|-------|------|-------------|-------------|-------------|
| TR14148-c0_g1 | 12    | 1    | 3.584962501 | 0.001140939 | 0.006775478 |
| TR16575-c0_g1 | 12    | 1    | 3.584962501 | 0.001140939 | 0.006775478 |
| TR17267-c0_g1 | 12    | 1    | 3.584962501 | 0.001140939 | 0.006775478 |
| TR18753-c0_g1 | 12    | 1    | 3.584962501 | 0.001140939 | 0.006775478 |
| TR19750-c0_g1 | 12    | 1    | 3.584962501 | 0.001140939 | 0.006775478 |
| TR19858-c0_g1 | 12    | 1    | 3.584962501 | 0.001140939 | 0.006775478 |
| TR20148-c0_g1 | 12    | 1    | 3.584962501 | 0.001140939 | 0.006775478 |
| TR2102-c0_g1  | 12    | 1    | 3.584962501 | 0.001140939 | 0.006775478 |
| TR2183-c0_g1  | 12    | 1    | 3.584962501 | 0.001140939 | 0.006775478 |
| TR25464-c0_g2 | 12    | 1    | 3.584962501 | 0.001140939 | 0.006775478 |
| TR8178-c1_g2  | 12    | 1    | 3.584962501 | 0.001140939 | 0.006775478 |
| TR8314-c0_g1  | 12    | 1    | 3.584962501 | 0.001140939 | 0.006775478 |
| TR5445-c0_g2  | 35    | 3    | 3.544320516 | 3.17482E-08 | 4.59763E-07 |
| TR7775-c0_g1  | 128   | 11   | 3.540568381 | 3.92784E-26 | 1.89174E-24 |
| TR13258-c0_g1 | 81    | 7    | 3.532495081 | 4.31371E-17 | 1.32381E-15 |
| TR15934-c0_g1 | 81    | 7    | 3.532495081 | 4.31371E-17 | 1.32381E-15 |
| TR4493-c0_g2  | 46    | 4    | 3.523561956 | 2.50216E-10 | 4.60391E-09 |
| TR14815-c0_g1 | 23    | 2    | 3.523561956 | 7.68658E-06 | 7.66914E-05 |
| TR22279-c0_g1 | 23    | 2    | 3.523561956 | 7.68658E-06 | 7.66914E-05 |
| TR24258-c0_g1 | 23    | 2    | 3.523561956 | 7.68658E-06 | 7.66914E-05 |
| TR27216-c1_g1 | 23    | 2    | 3.523561956 | 7.68658E-06 | 7.66914E-05 |
| TR27563-c0_g1 | 23    | 2    | 3.523561956 | 7.68658E-06 | 7.66914E-05 |
| TR379-c0_g1   | 23    | 2    | 3.523561956 | 7.68658E-06 | 7.66914E-05 |
| TR4061-c0_g1  | 23    | 2    | 3.523561956 | 7.68658E-06 | 7.66914E-05 |
| TR12824-c7_g1 | 16194 | 1418 | 3.513529945 | 0           | 0           |
| TR2894-c0_g1  | 251   | 22   | 3.512111935 | 2.62332E-49 | 2.51977E-47 |
| TR17479-c0_g1 | 68    | 6    | 3.502500341 | 1.6646E-14  | 4.34721E-13 |
| TR12850-c0_g1 | 34    | 3    | 3.502500341 | 5.74927E-08 | 8.0119E-07  |
| TR17957-c0_g1 | 34    | 3    | 3.502500341 | 5.74927E-08 | 8.0119E-07  |
| TR22295-c0_g1 | 34    | 3    | 3.502500341 | 5.74927E-08 | 8.0119E-07  |
| TR293-c0_g1   | 34    | 3    | 3.502500341 | 5.74927E-08 | 8.0119E-07  |
| TR17479-c0_g4 | 147   | 13   | 3.499232627 | 1.65964E-29 | 9.34306E-28 |
| TR15490-c0_g1 | 67    | 6    | 3.48112669  | 2.98625E-14 | 7.6692E-13  |
| TR1657-c0_g1  | 67    | 6    | 3.48112669  | 2.98625E-14 | 7.6692E-13  |
| TR22304-c0_g1 | 67    | 6    | 3.48112669  | 2.98625E-14 | 7.6692E-13  |
| TR10161-c0_g2 | 266   | 24   | 3.470319935 | 1.1453E-51  | 1.14539E-49 |
| TR22967-c0_g1 | 66    | 6    | 3.459431619 | 5.35484E-14 | 1.34475E-12 |
| TR4875-c0_g1  | 66    | 6    | 3.459431619 | 5.35484E-14 | 1.34475E-12 |
| TR4912-c0_g1  | 55    | 5    | 3.459431619 | 6.53481E-12 | 1.41169E-10 |
| TR13900-c0_g1 | 33    | 3    | 3.459431619 | 1.04057E-07 | 1.3908E-06  |
| TR17879-c0_g1 | 33    | 3    | 3.459431619 | 1.04057E-07 | 1.3908E-06  |
| TR653-c0_g1   | 33    | 3    | 3.459431619 | 1.04057E-07 | 1.3908E-06  |
| TR19688-c0_g1 | 22    | 2    | 3.459431619 | 1.40335E-05 | 0.000133738 |
| TR24255-c1_g1 | 22    | 2    | 3.459431619 | 1.40335E-05 | 0.000133738 |



|               |      |     |             |             |             |
|---------------|------|-----|-------------|-------------|-------------|
| TR26197-c0_g1 | 22   | 2   | 3.459431619 | 1.40335E-05 | 0.000133738 |
| TR1023-c0_g1  | 11   | 1   | 3.459431619 | 0.002132049 | 0.011448734 |
| TR1156-c0_g1  | 11   | 1   | 3.459431619 | 0.002132049 | 0.011448734 |
| TR14458-c0_g1 | 11   | 1   | 3.459431619 | 0.002132049 | 0.011448734 |
| TR15375-c0_g1 | 11   | 1   | 3.459431619 | 0.002132049 | 0.011448734 |
| TR15922-c0_g1 | 11   | 1   | 3.459431619 | 0.002132049 | 0.011448734 |
| TR16796-c0_g1 | 11   | 1   | 3.459431619 | 0.002132049 | 0.011448734 |
| TR17522-c0_g1 | 11   | 1   | 3.459431619 | 0.002132049 | 0.011448734 |
| TR18497-c0_g1 | 11   | 1   | 3.459431619 | 0.002132049 | 0.011448734 |
| TR19039-c0_g2 | 11   | 1   | 3.459431619 | 0.002132049 | 0.011448734 |
| TR19428-c0_g1 | 11   | 1   | 3.459431619 | 0.002132049 | 0.011448734 |
| TR1955-c0_g1  | 11   | 1   | 3.459431619 | 0.002132049 | 0.011448734 |
| TR20123-c0_g2 | 11   | 1   | 3.459431619 | 0.002132049 | 0.011448734 |
| TR20652-c0_g1 | 11   | 1   | 3.459431619 | 0.002132049 | 0.011448734 |
| TR22561-c0_g2 | 11   | 1   | 3.459431619 | 0.002132049 | 0.011448734 |
| TR23306-c0_g1 | 11   | 1   | 3.459431619 | 0.002132049 | 0.011448734 |
| TR23576-c0_g1 | 11   | 1   | 3.459431619 | 0.002132049 | 0.011448734 |
| TR24016-c0_g1 | 11   | 1   | 3.459431619 | 0.002132049 | 0.011448734 |
| TR25132-c0_g2 | 11   | 1   | 3.459431619 | 0.002132049 | 0.011448734 |
| TR25464-c0_g1 | 11   | 1   | 3.459431619 | 0.002132049 | 0.011448734 |
| TR25821-c0_g1 | 11   | 1   | 3.459431619 | 0.002132049 | 0.011448734 |
| TR26260-c0_g1 | 11   | 1   | 3.459431619 | 0.002132049 | 0.011448734 |
| TR27664-c0_g2 | 11   | 1   | 3.459431619 | 0.002132049 | 0.011448734 |
| TR27786-c0_g1 | 11   | 1   | 3.459431619 | 0.002132049 | 0.011448734 |
| TR3059-c0_g1  | 11   | 1   | 3.459431619 | 0.002132049 | 0.011448734 |
| TR3691-c0_g2  | 11   | 1   | 3.459431619 | 0.002132049 | 0.011448734 |
| TR732-c0_g2   | 11   | 1   | 3.459431619 | 0.002132049 | 0.011448734 |
| TR9130-c0_g1  | 11   | 1   | 3.459431619 | 0.002132049 | 0.011448734 |
| TR12854-c0_g1 | 120  | 11  | 3.447458977 | 4.07483E-24 | 1.7855E-22  |
| TR12265-c0_g2 | 54   | 5   | 3.432959407 | 1.17341E-11 | 2.46901E-10 |
| TR24933-c0_g1 | 268  | 25  | 3.422233001 | 1.7909E-51  | 1.78056E-49 |
| TR5151-c0_g1  | 32   | 3   | 3.415037499 | 1.88214E-07 | 2.44079E-06 |
| TR8507-c3_g2  | 1956 | 184 | 3.410128699 | 0           | 0           |
| TR13376-c0_g1 | 42   | 4   | 3.392317423 | 2.63296E-09 | 4.29594E-08 |
| TR16446-c0_g1 | 21   | 2   | 3.392317423 | 2.56081E-05 | 0.000232943 |
| TR19849-c0_g1 | 21   | 2   | 3.392317423 | 2.56081E-05 | 0.000232943 |
| TR22168-c0_g2 | 21   | 2   | 3.392317423 | 2.56081E-05 | 0.000232943 |
| TR11265-c0_g1 | 125  | 12  | 3.380821784 | 1.11781E-24 | 4.98797E-23 |
| TR8507-c3_g1  | 1916 | 184 | 3.38031989  | 0           | 0           |
| TR4493-c0_g1  | 52   | 5   | 3.378511623 | 3.77675E-11 | 7.53636E-10 |
| TR10283-c1_g3 | 31   | 3   | 3.36923381  | 3.40183E-07 | 4.26516E-06 |
| TR17111-c0_g2 | 31   | 3   | 3.36923381  | 3.40183E-07 | 4.26516E-06 |
| TR5696-c0_g1  | 31   | 3   | 3.36923381  | 3.40183E-07 | 4.26516E-06 |
| TR8264-c0_g7  | 102  | 10  | 3.350497247 | 2.73576E-20 | 9.89607E-19 |

|               |     |    |             |             |             |
|---------------|-----|----|-------------|-------------|-------------|
| TR12265-c0_g1 | 51  | 5  | 3.350497247 | 6.76905E-11 | 1.30627E-09 |
| TR3825-c0_g1  | 51  | 5  | 3.350497247 | 6.76905E-11 | 1.30627E-09 |
| TR8006-c0_g1  | 51  | 5  | 3.350497247 | 6.76905E-11 | 1.30627E-09 |
| TR14900-c0_g1 | 81  | 8  | 3.339850003 | 2.15847E-16 | 6.38206E-15 |
| TR7289-c0_g1  | 101 | 10 | 3.336283388 | 4.86992E-20 | 1.74306E-18 |
| TR11197-c0_g3 | 50  | 5  | 3.321928095 | 1.21234E-10 | 2.2775E-09  |
| TR10151-c0_g2 | 20  | 2  | 3.321928095 | 4.66961E-05 | 0.000397544 |
| TR13354-c0_g1 | 20  | 2  | 3.321928095 | 4.66961E-05 | 0.000397544 |
| TR14799-c0_g1 | 20  | 2  | 3.321928095 | 4.66961E-05 | 0.000397544 |
| TR14913-c0_g1 | 20  | 2  | 3.321928095 | 4.66961E-05 | 0.000397544 |
| TR17841-c1_g1 | 20  | 2  | 3.321928095 | 4.66961E-05 | 0.000397544 |
| TR26197-c0_g2 | 20  | 2  | 3.321928095 | 4.66961E-05 | 0.000397544 |
| TR26872-c0_g1 | 20  | 2  | 3.321928095 | 4.66961E-05 | 0.000397544 |
| TR4146-c0_g1  | 20  | 2  | 3.321928095 | 4.66961E-05 | 0.000397544 |
| TR9286-c0_g1  | 20  | 2  | 3.321928095 | 4.66961E-05 | 0.000397544 |
| TR1132-c0_g1  | 10  | 1  | 3.321928095 | 0.003988987 | 0.019376588 |
| TR12465-c0_g1 | 10  | 1  | 3.321928095 | 0.003988987 | 0.019376588 |
| TR1296-c0_g1  | 10  | 1  | 3.321928095 | 0.003988987 | 0.019376588 |
| TR14691-c0_g1 | 10  | 1  | 3.321928095 | 0.003988987 | 0.019376588 |
| TR15730-c0_g2 | 10  | 1  | 3.321928095 | 0.003988987 | 0.019376588 |
| TR17534-c0_g1 | 10  | 1  | 3.321928095 | 0.003988987 | 0.019376588 |
| TR18762-c0_g1 | 10  | 1  | 3.321928095 | 0.003988987 | 0.019376588 |
| TR18932-c0_g1 | 10  | 1  | 3.321928095 | 0.003988987 | 0.019376588 |
| TR205-c0_g1   | 10  | 1  | 3.321928095 | 0.003988987 | 0.019376588 |
| TR20838-c0_g2 | 10  | 1  | 3.321928095 | 0.003988987 | 0.019376588 |
| TR21387-c0_g1 | 10  | 1  | 3.321928095 | 0.003988987 | 0.019376588 |
| TR22412-c0_g1 | 10  | 1  | 3.321928095 | 0.003988987 | 0.019376588 |
| TR22561-c0_g1 | 10  | 1  | 3.321928095 | 0.003988987 | 0.019376588 |
| TR23224-c0_g1 | 10  | 1  | 3.321928095 | 0.003988987 | 0.019376588 |
| TR23628-c0_g1 | 10  | 1  | 3.321928095 | 0.003988987 | 0.019376588 |
| TR23924-c0_g1 | 10  | 1  | 3.321928095 | 0.003988987 | 0.019376588 |
| TR24172-c0_g2 | 10  | 1  | 3.321928095 | 0.003988987 | 0.019376588 |
| TR25829-c0_g1 | 10  | 1  | 3.321928095 | 0.003988987 | 0.019376588 |
| TR26049-c0_g1 | 10  | 1  | 3.321928095 | 0.003988987 | 0.019376588 |
| TR26358-c0_g1 | 10  | 1  | 3.321928095 | 0.003988987 | 0.019376588 |
| TR27146-c0_g1 | 10  | 1  | 3.321928095 | 0.003988987 | 0.019376588 |
| TR27251-c0_g1 | 10  | 1  | 3.321928095 | 0.003988987 | 0.019376588 |
| TR27468-c0_g3 | 10  | 1  | 3.321928095 | 0.003988987 | 0.019376588 |
| TR2848-c0_g2  | 10  | 1  | 3.321928095 | 0.003988987 | 0.019376588 |
| TR3783-c0_g1  | 10  | 1  | 3.321928095 | 0.003988987 | 0.019376588 |
| TR3783-c0_g2  | 10  | 1  | 3.321928095 | 0.003988987 | 0.019376588 |
| TR3812-c0_g1  | 10  | 1  | 3.321928095 | 0.003988987 | 0.019376588 |
| TR4902-c0_g1  | 10  | 1  | 3.321928095 | 0.003988987 | 0.019376588 |
| TR5437-c0_g2  | 10  | 1  | 3.321928095 | 0.003988987 | 0.019376588 |

|                |      |      |             |             |             |
|----------------|------|------|-------------|-------------|-------------|
| TR647-c0_g1    | 10   | 1    | 3.321928095 | 0.003988987 | 0.019376588 |
| TR8127-c0_g1   | 10   | 1    | 3.321928095 | 0.003988987 | 0.019376588 |
| TR9033-c0_g2   | 10   | 1    | 3.321928095 | 0.003988987 | 0.019376588 |
| TR11198-c0_g1  | 89   | 9    | 3.30580843  | 1.02454E-17 | 3.23764E-16 |
| TR21092-c0_g1  | 49   | 5    | 3.292781749 | 2.16964E-10 | 4.00508E-09 |
| TR8535-c0_g1   | 39   | 4    | 3.285402219 | 1.52695E-08 | 2.26925E-07 |
| TR16584-c0_g1  | 29   | 3    | 3.273018494 | 1.10835E-06 | 1.27766E-05 |
| TR19824-c0_g1  | 29   | 3    | 3.273018494 | 1.10835E-06 | 1.27766E-05 |
| TR24228-c0_g1  | 29   | 3    | 3.273018494 | 1.10835E-06 | 1.27766E-05 |
| TR10081-c0_g1  | 144  | 15   | 3.263034406 | 2.20448E-27 | 1.13918E-25 |
| TR10318-c1_g16 | 1581 | 165  | 3.260299438 | 1.3916E-282 | 1.0286E-279 |
| TR1450-c0_g2   | 19   | 2    | 3.247927513 | 8.50715E-05 | 0.000684166 |
| TR17241-c0_g1  | 19   | 2    | 3.247927513 | 8.50715E-05 | 0.000684166 |
| TR23265-c0_g2  | 19   | 2    | 3.247927513 | 8.50715E-05 | 0.000684166 |
| TR7662-c0_g1   | 19   | 2    | 3.247927513 | 8.50715E-05 | 0.000684166 |
| TR8179-c3_g8   | 19   | 2    | 3.247927513 | 8.50715E-05 | 0.000684166 |
| TR839-c0_g2    | 19   | 2    | 3.247927513 | 8.50715E-05 | 0.000684166 |
| TR9798-c0_g1   | 19   | 2    | 3.247927513 | 8.50715E-05 | 0.000684166 |
| TR27508-c0_g1  | 66   | 7    | 3.237039197 | 2.60879E-13 | 6.29118E-12 |
| TR9585-c0_g1   | 66   | 7    | 3.237039197 | 2.60879E-13 | 6.29118E-12 |
| TR4019-c0_g1   | 1302 | 139  | 3.22757266  | 5.3093E-231 | 2.9118E-228 |
| TR880-c0_g1    | 28   | 3    | 3.222392421 | 1.99742E-06 | 2.19656E-05 |
| TR23223-c0_g2  | 121  | 13   | 3.218423519 | 5.24887E-23 | 2.17653E-21 |
| TR2807-c0_g1   | 341  | 37   | 3.204174563 | 1.63884E-61 | 2.03376E-59 |
| TR9388-c1_g1   | 343  | 38   | 3.174137253 | 2.36985E-61 | 2.89861E-59 |
| TR4493-c0_g3   | 63   | 7    | 3.169925001 | 1.46378E-12 | 3.32704E-11 |
| TR14480-c0_g1  | 54   | 6    | 3.169925001 | 5.64586E-11 | 1.10203E-09 |
| TR18721-c0_g1  | 54   | 6    | 3.169925001 | 5.64586E-11 | 1.10203E-09 |
| TR22283-c0_g1  | 54   | 6    | 3.169925001 | 5.64586E-11 | 1.10203E-09 |
| TR19097-c0_g2  | 27   | 3    | 3.169925001 | 3.59515E-06 | 3.80587E-05 |
| TR20825-c0_g2  | 27   | 3    | 3.169925001 | 3.59515E-06 | 3.80587E-05 |
| TR3160-c0_g1   | 27   | 3    | 3.169925001 | 3.59515E-06 | 3.80587E-05 |
| TR6153-c0_g2   | 27   | 3    | 3.169925001 | 3.59515E-06 | 3.80587E-05 |
| TR6701-c0_g1   | 27   | 3    | 3.169925001 | 3.59515E-06 | 3.80587E-05 |
| TR9161-c0_g1   | 27   | 3    | 3.169925001 | 3.59515E-06 | 3.80587E-05 |
| TR10523-c0_g1  | 18   | 2    | 3.169925001 | 0.000154802 | 0.001173357 |
| TR24514-c0_g1  | 18   | 2    | 3.169925001 | 0.000154802 | 0.001173357 |
| TR833-c0_g2    | 457  | 51   | 3.163625013 | 6.85308E-81 | 1.14227E-78 |
| TR14478-c0_g1  | 80   | 9    | 3.152003093 | 1.78827E-15 | 5.00873E-14 |
| TR22384-c0_g3  | 62   | 7    | 3.146841388 | 2.59679E-12 | 5.79381E-11 |
| TR11702-c9_g1  | 9810 | 1113 | 3.139799544 | 0           | 0           |
| TR11197-c0_g1  | 44   | 5    | 3.137503524 | 3.92904E-09 | 6.29585E-08 |
| TR6703-c0_g1   | 79   | 9    | 3.133855747 | 3.16301E-15 | 8.75821E-14 |
| TR7512-c0_g1   | 140  | 16   | 3.129283017 | 9.72144E-26 | 4.57832E-24 |

|               |      |      |             |             |             |
|---------------|------|------|-------------|-------------|-------------|
| TR16338-c0_g1 | 35   | 4    | 3.129283017 | 1.5691E-07  | 2.06888E-06 |
| TR6217-c0_g1  | 35   | 4    | 3.129283017 | 1.5691E-07  | 2.06888E-06 |
| TR8135-c0_g1  | 35   | 4    | 3.129283017 | 1.5691E-07  | 2.06888E-06 |
| TR5152-c0_g3  | 96   | 11   | 3.125530882 | 3.93547E-18 | 1.27202E-16 |
| TR7303-c0_g1  | 148  | 17   | 3.121990524 | 4.63187E-27 | 2.34369E-25 |
| TR22299-c0_g1 | 182  | 21   | 3.115477217 | 7.80367E-33 | 4.95047E-31 |
| TR4863-c0_g1  | 458  | 53   | 3.111283334 | 7.49308E-80 | 1.22493E-77 |
| TR11248-c0_g1 | 43   | 5    | 3.10433666  | 6.99001E-09 | 1.0843E-07  |
| TR12931-c0_g1 | 17   | 2    | 3.087462841 | 0.000281275 | 0.001998436 |
| TR16657-c0_g2 | 17   | 2    | 3.087462841 | 0.000281275 | 0.001998436 |
| TR23265-c0_g1 | 17   | 2    | 3.087462841 | 0.000281275 | 0.001998436 |
| TR7884-c0_g1  | 17   | 2    | 3.087462841 | 0.000281275 | 0.001998436 |
| TR9506-c0_g1  | 17   | 2    | 3.087462841 | 0.000281275 | 0.001998436 |
| TR5826-c0_g1  | 118  | 14   | 3.075288127 | 1.28134E-21 | 4.99644E-20 |
| TR3987-c0_g1  | 84   | 10   | 3.070389328 | 8.11676E-16 | 2.30762E-14 |
| TR11197-c0_g2 | 42   | 5    | 3.070389328 | 1.24202E-08 | 1.86702E-07 |
| TR16323-c0_g1 | 42   | 5    | 3.070389328 | 1.24202E-08 | 1.86702E-07 |
| TR17319-c0_g1 | 42   | 5    | 3.070389328 | 1.24202E-08 | 1.86702E-07 |
| TR21295-c1_g1 | 42   | 5    | 3.070389328 | 1.24202E-08 | 1.86702E-07 |
| TR10318-c1_g9 | 842  | 101  | 3.05946494  | 5.9239E-143 | 1.707E-140  |
| TR9798-c0_g2  | 25   | 3    | 3.058893689 | 1.15953E-05 | 0.000112584 |
| TR4211-c0_g1  | 66   | 8    | 3.044394119 | 1.17034E-12 | 2.68158E-11 |
| TR13163-c0_g1 | 33   | 4    | 3.044394119 | 4.99122E-07 | 6.08297E-06 |
| TR27576-c0_g1 | 33   | 4    | 3.044394119 | 4.99122E-07 | 6.08297E-06 |
| TR6640-c0_g1  | 33   | 4    | 3.044394119 | 4.99122E-07 | 6.08297E-06 |
| TR2616-c3_g1  | 280  | 34   | 3.041820176 | 1.62737E-48 | 1.52859E-46 |
| TR18817-c0_g1 | 82   | 10   | 3.03562391  | 2.51513E-15 | 6.98701E-14 |
| TR9270-c0_g1  | 41   | 5    | 3.03562391  | 2.20394E-08 | 3.23575E-07 |
| TR14645-c0_g1 | 147  | 18   | 3.029747343 | 3.49865E-26 | 1.70246E-24 |
| TR10373-c3_g2 | 49   | 6    | 3.029747343 | 9.8971E-10  | 1.70826E-08 |
| TR12211-c0_g1 | 49   | 6    | 3.029747343 | 9.8971E-10  | 1.70826E-08 |
| TR14956-c0_g1 | 163  | 20   | 3.026800059 | 7.92366E-29 | 4.31771E-27 |
| TR10479-c0_g1 | 73   | 9    | 3.019899557 | 9.52368E-14 | 2.37412E-12 |
| TR11702-c0_g1 | 234  | 29   | 3.012383724 | 1.81418E-40 | 1.40838E-38 |
| TR12542-c2_g1 | 9022 | 1119 | 3.01123725  | 0           | 0           |
| TR2442-c0_g2  | 72   | 9    | 3           | 1.67461E-13 | 4.09649E-12 |
| TR12325-c0_g1 | 48   | 6    | 3           | 1.74876E-09 | 2.90343E-08 |
| TR26982-c0_g1 | 40   | 5    | 3           | 3.90529E-08 | 5.57474E-07 |
| TR16889-c0_g1 | 32   | 4    | 3           | 8.88102E-07 | 1.03701E-05 |
| TR25188-c0_g1 | 32   | 4    | 3           | 8.88102E-07 | 1.03701E-05 |
| TR15017-c0_g1 | 24   | 3    | 3           | 2.07697E-05 | 0.000191909 |
| TR325-c0_g1   | 24   | 3    | 3           | 2.07697E-05 | 0.000191909 |
| TR9166-c0_g1  | 24   | 3    | 3           | 2.07697E-05 | 0.000191909 |
| TR12711-c0_g1 | 16   | 2    | 3           | 0.00051015  | 0.003365626 |

|                |     |     |             |             |             |
|----------------|-----|-----|-------------|-------------|-------------|
| TR15977-c0_g1  | 16  | 2   | 3           | 0.00051015  | 0.003365626 |
| TR16023-c0_g1  | 16  | 2   | 3           | 0.00051015  | 0.003365626 |
| TR16657-c0_g1  | 16  | 2   | 3           | 0.00051015  | 0.003365626 |
| TR1991-c0_g1   | 16  | 2   | 3           | 0.00051015  | 0.003365626 |
| TR24749-c0_g1  | 16  | 2   | 3           | 0.00051015  | 0.003365626 |
| TR26151-c0_g1  | 16  | 2   | 3           | 0.00051015  | 0.003365626 |
| TR26201-c0_g1  | 16  | 2   | 3           | 0.00051015  | 0.003365626 |
| TR3754-c0_g1   | 16  | 2   | 3           | 0.00051015  | 0.003365626 |
| TR7352-c0_g2   | 16  | 2   | 3           | 0.00051015  | 0.003365626 |
| TR9708-c0_g1   | 16  | 2   | 3           | 0.00051015  | 0.003365626 |
| TR12265-c0_g3  | 71  | 9   | 2.979822118 | 2.94173E-13 | 7.05406E-12 |
| TR4594-c0_g1   | 47  | 6   | 2.969626351 | 3.08581E-09 | 5.00599E-08 |
| TR466-c0_g1    | 39  | 5   | 2.963474124 | 6.90947E-08 | 9.42022E-07 |
| TR25172-c0_g1  | 31  | 4   | 2.95419631  | 1.57745E-06 | 1.76671E-05 |
| TR3076-c0_g1   | 209 | 27  | 2.95247163  | 1.18191E-35 | 8.33776E-34 |
| TR13796-c0_g1  | 46  | 6   | 2.938599455 | 5.43743E-09 | 8.54376E-08 |
| TR1045-c0_g1   | 23  | 3   | 2.938599455 | 3.71273E-05 | 0.000327053 |
| TR24256-c0_g1  | 23  | 3   | 2.938599455 | 3.71273E-05 | 0.000327053 |
| TR9228-c0_g1   | 23  | 3   | 2.938599455 | 3.71273E-05 | 0.000327053 |
| TR19601-c0_g1  | 98  | 13  | 2.914270126 | 2.27119E-17 | 7.11108E-16 |
| TR26909-c0_g1  | 978 | 130 | 2.911322842 | 5.6239E-158 | 1.9513E-155 |
| TR26180-c0_g1  | 60  | 8   | 2.906890596 | 3.44966E-11 | 6.93248E-10 |
| TR14482-c0_g1  | 30  | 4   | 2.906890596 | 2.79649E-06 | 3.01676E-05 |
| TR15465-c0_g1  | 30  | 4   | 2.906890596 | 2.79649E-06 | 3.01676E-05 |
| TR12842-c0_g1  | 15  | 2   | 2.906890596 | 0.000923206 | 0.005629744 |
| TR14410-c0_g1  | 15  | 2   | 2.906890596 | 0.000923206 | 0.005629744 |
| TR18389-c0_g1  | 15  | 2   | 2.906890596 | 0.000923206 | 0.005629744 |
| TR20838-c0_g1  | 15  | 2   | 2.906890596 | 0.000923206 | 0.005629744 |
| TR3582-c1_g1   | 15  | 2   | 2.906890596 | 0.000923206 | 0.005629744 |
| TR6156-c0_g2   | 15  | 2   | 2.906890596 | 0.000923206 | 0.005629744 |
| TR6681-c0_g1   | 15  | 2   | 2.906890596 | 0.000923206 | 0.005629744 |
| TR7449-c0_g1   | 15  | 2   | 2.906890596 | 0.000923206 | 0.005629744 |
| TR7621-c0_g1   | 15  | 2   | 2.906890596 | 0.000923206 | 0.005629744 |
| TR786-c0_g2    | 15  | 2   | 2.906890596 | 0.000923206 | 0.005629744 |
| TR10321-c4_g3  | 179 | 24  | 2.898853277 | 2.99254E-30 | 1.73052E-28 |
| TR11135-c0_g1  | 929 | 125 | 2.893750502 | 2.9355E-149 | 8.9121E-147 |
| TR539-c3_g1    | 111 | 15  | 2.887525271 | 2.65634E-19 | 9.1605E-18  |
| TR13788-c0_g1  | 37  | 5   | 2.887525271 | 2.15204E-07 | 2.7781E-06  |
| TR4009-c0_g1   | 37  | 5   | 2.887525271 | 2.15204E-07 | 2.7781E-06  |
| TR10293-c0_g13 | 458 | 62  | 2.885007478 | 2.52301E-74 | 3.76267E-72 |
| TR7788-c0_g1   | 198 | 27  | 2.874469118 | 5.15636E-33 | 3.32064E-31 |
| TR8766-c0_g2   | 44  | 6   | 2.874469118 | 1.68056E-08 | 2.48883E-07 |
| TR13156-c0_g1  | 22  | 3   | 2.874469118 | 6.62154E-05 | 0.000545686 |
| TR1898-c0_g1   | 22  | 3   | 2.874469118 | 6.62154E-05 | 0.000545686 |

|               |     |     |             |             |             |
|---------------|-----|-----|-------------|-------------|-------------|
| TR21822-c0_g1 | 22  | 3   | 2.874469118 | 6.62154E-05 | 0.000545686 |
| TR22404-c0_g2 | 22  | 3   | 2.874469118 | 6.62154E-05 | 0.000545686 |
| TR24976-c0_g2 | 22  | 3   | 2.874469118 | 6.62154E-05 | 0.000545686 |
| TR7184-c0_g1  | 22  | 3   | 2.874469118 | 6.62154E-05 | 0.000545686 |
| TR15412-c0_g1 | 95  | 13  | 2.86941589  | 1.20084E-16 | 3.58804E-15 |
| TR10097-c2_g1 | 109 | 15  | 2.861293729 | 8.02963E-19 | 2.69791E-17 |
| TR17879-c1_g1 | 29  | 4   | 2.857980995 | 4.94726E-06 | 5.09757E-05 |
| TR22931-c0_g1 | 29  | 4   | 2.857980995 | 4.94726E-06 | 5.09757E-05 |
| TR23828-c0_g1 | 29  | 4   | 2.857980995 | 4.94726E-06 | 5.09757E-05 |
| TR27358-c0_g1 | 29  | 4   | 2.857980995 | 4.94726E-06 | 5.09757E-05 |
| TR16785-c0_g1 | 65  | 9   | 2.852442812 | 8.4516E-12  | 1.80968E-10 |
| TR15953-c4_g1 | 180 | 25  | 2.847996907 | 6.74764E-30 | 3.86258E-28 |
| TR17051-c0_g1 | 36  | 5   | 2.847996907 | 3.78758E-07 | 4.71841E-06 |
| TR7806-c0_g1  | 200 | 28  | 2.836501268 | 6.66149E-33 | 4.25768E-31 |
| TR6523-c0_g1  | 695 | 98  | 2.826159323 | 1.6104E-109 | 3.4656E-107 |
| TR21423-c0_g4 | 184 | 26  | 2.823122238 | 2.89387E-30 | 1.67917E-28 |
| TR5571-c0_g1  | 63  | 9   | 2.807354922 | 2.56376E-11 | 5.21379E-10 |
| TR6175-c0_g1  | 49  | 7   | 2.807354922 | 4.05164E-09 | 6.48008E-08 |
| TR13669-c0_g1 | 35  | 5   | 2.807354922 | 6.65278E-07 | 7.99336E-06 |
| TR261-c0_g1   | 35  | 5   | 2.807354922 | 6.65278E-07 | 7.99336E-06 |
| TR16434-c0_g1 | 28  | 4   | 2.807354922 | 8.73222E-06 | 8.60634E-05 |
| TR10334-c0_g3 | 21  | 3   | 2.807354922 | 0.000117788 | 0.000921561 |
| TR10592-c0_g1 | 21  | 3   | 2.807354922 | 0.000117788 | 0.000921561 |
| TR14823-c0_g1 | 21  | 3   | 2.807354922 | 0.000117788 | 0.000921561 |
| TR27638-c0_g1 | 21  | 3   | 2.807354922 | 0.000117788 | 0.000921561 |
| TR3922-c0_g1  | 21  | 3   | 2.807354922 | 0.000117788 | 0.000921561 |
| TR11683-c0_g1 | 14  | 2   | 2.807354922 | 0.001666191 | 0.009342828 |
| TR11736-c0_g1 | 14  | 2   | 2.807354922 | 0.001666191 | 0.009342828 |
| TR13245-c0_g1 | 14  | 2   | 2.807354922 | 0.001666191 | 0.009342828 |
| TR1450-c0_g1  | 14  | 2   | 2.807354922 | 0.001666191 | 0.009342828 |
| TR14632-c0_g1 | 14  | 2   | 2.807354922 | 0.001666191 | 0.009342828 |
| TR24819-c0_g1 | 14  | 2   | 2.807354922 | 0.001666191 | 0.009342828 |
| TR26156-c0_g1 | 14  | 2   | 2.807354922 | 0.001666191 | 0.009342828 |
| TR26743-c0_g1 | 14  | 2   | 2.807354922 | 0.001666191 | 0.009342828 |
| TR392-c0_g1   | 14  | 2   | 2.807354922 | 0.001666191 | 0.009342828 |
| TR5493-c0_g2  | 14  | 2   | 2.807354922 | 0.001666191 | 0.009342828 |
| TR6153-c0_g1  | 14  | 2   | 2.807354922 | 0.001666191 | 0.009342828 |
| TR1136-c0_g1  | 139 | 20  | 2.797012978 | 4.68403E-23 | 1.95183E-21 |
| TR9466-c1_g1  | 708 | 103 | 2.781105023 | 1.0294E-109 | 2.2438E-107 |
| TR16773-c0_g1 | 34  | 5   | 2.765534746 | 1.16603E-06 | 1.33856E-05 |
| TR9456-c0_g1  | 34  | 5   | 2.765534746 | 1.16603E-06 | 1.33856E-05 |
| TR157-c0_g1   | 27  | 4   | 2.754887502 | 1.53746E-05 | 0.000145216 |
| TR20732-c0_g1 | 27  | 4   | 2.754887502 | 1.53746E-05 | 0.000145216 |
| TR19680-c0_g1 | 121 | 18  | 2.748938236 | 6.13559E-20 | 2.17319E-18 |

|                |      |     |             |             |             |
|----------------|------|-----|-------------|-------------|-------------|
| TR24012-c0_g1  | 47   | 7   | 2.74723393  | 1.22934E-08 | 1.85452E-07 |
| TR21010-c0_g1  | 715  | 107 | 2.740332445 | 4.2805E-109 | 9.0967E-107 |
| TR16294-c0_g2  | 20   | 3   | 2.736965594 | 0.000208919 | 0.001545647 |
| TR2109-c0_g1   | 20   | 3   | 2.736965594 | 0.000208919 | 0.001545647 |
| TR2109-c0_g3   | 20   | 3   | 2.736965594 | 0.000208919 | 0.001545647 |
| TR23208-c0_g1  | 20   | 3   | 2.736965594 | 0.000208919 | 0.001545647 |
| TR27198-c0_g1  | 20   | 3   | 2.736965594 | 0.000208919 | 0.001545647 |
| TR4172-c0_g1   | 20   | 3   | 2.736965594 | 0.000208919 | 0.001545647 |
| TR526-c0_g1    | 20   | 3   | 2.736965594 | 0.000208919 | 0.001545647 |
| TR9501-c0_g1   | 20   | 3   | 2.736965594 | 0.000208919 | 0.001545647 |
| TR11293-c0_g1  | 53   | 8   | 2.727920455 | 1.68513E-09 | 2.80327E-08 |
| TR24175-c0_g1  | 53   | 8   | 2.727920455 | 1.68513E-09 | 2.80327E-08 |
| TR833-c0_g1    | 311  | 47  | 2.726181918 | 3.13494E-48 | 2.91246E-46 |
| TR24051-c0_g1  | 46   | 7   | 2.716207034 | 2.13557E-08 | 3.14079E-07 |
| TR2582-c4_g1   | 1107 | 170 | 2.703048571 | 1.9299E-165 | 7.1328E-163 |
| TR12558-c1_g1  | 78   | 12  | 2.700439718 | 3.58721E-13 | 8.57769E-12 |
| TR10293-c0_g17 | 39   | 6   | 2.700439718 | 2.73567E-07 | 3.46572E-06 |
| TR14866-c0_g1  | 26   | 4   | 2.700439718 | 2.69961E-05 | 0.000244263 |
| TR157-c0_g2    | 26   | 4   | 2.700439718 | 2.69961E-05 | 0.000244263 |
| TR6808-c0_g2   | 26   | 4   | 2.700439718 | 2.69961E-05 | 0.000244263 |
| TR10318-c2_g1  | 13   | 2   | 2.700439718 | 0.002997266 | 0.015332054 |
| TR11044-c0_g1  | 13   | 2   | 2.700439718 | 0.002997266 | 0.015332054 |
| TR11683-c0_g2  | 13   | 2   | 2.700439718 | 0.002997266 | 0.015332054 |
| TR12165-c0_g1  | 13   | 2   | 2.700439718 | 0.002997266 | 0.015332054 |
| TR14020-c0_g2  | 13   | 2   | 2.700439718 | 0.002997266 | 0.015332054 |
| TR14170-c0_g1  | 13   | 2   | 2.700439718 | 0.002997266 | 0.015332054 |
| TR14809-c0_g1  | 13   | 2   | 2.700439718 | 0.002997266 | 0.015332054 |
| TR15527-c0_g1  | 13   | 2   | 2.700439718 | 0.002997266 | 0.015332054 |
| TR16411-c0_g1  | 13   | 2   | 2.700439718 | 0.002997266 | 0.015332054 |
| TR22168-c0_g1  | 13   | 2   | 2.700439718 | 0.002997266 | 0.015332054 |
| TR24018-c0_g1  | 13   | 2   | 2.700439718 | 0.002997266 | 0.015332054 |
| TR24325-c0_g2  | 13   | 2   | 2.700439718 | 0.002997266 | 0.015332054 |
| TR25173-c0_g1  | 13   | 2   | 2.700439718 | 0.002997266 | 0.015332054 |
| TR25173-c0_g2  | 13   | 2   | 2.700439718 | 0.002997266 | 0.015332054 |
| TR26323-c0_g1  | 13   | 2   | 2.700439718 | 0.002997266 | 0.015332054 |
| TR347-c0_g1    | 13   | 2   | 2.700439718 | 0.002997266 | 0.015332054 |
| TR3756-c0_g1   | 13   | 2   | 2.700439718 | 0.002997266 | 0.015332054 |
| TR4068-c0_g1   | 13   | 2   | 2.700439718 | 0.002997266 | 0.015332054 |
| TR4847-c0_g1   | 13   | 2   | 2.700439718 | 0.002997266 | 0.015332054 |
| TR4847-c0_g2   | 13   | 2   | 2.700439718 | 0.002997266 | 0.015332054 |
| TR6154-c0_g2   | 13   | 2   | 2.700439718 | 0.002997266 | 0.015332054 |
| TR71-c0_g2     | 13   | 2   | 2.700439718 | 0.002997266 | 0.015332054 |
| TR8112-c0_g1   | 13   | 2   | 2.700439718 | 0.002997266 | 0.015332054 |
| TR9400-c0_g2   | 13   | 2   | 2.700439718 | 0.002997266 | 0.015332054 |

|               |     |    |             |             |             |
|---------------|-----|----|-------------|-------------|-------------|
| TR4863-c0_g2  | 310 | 48 | 2.691161905 | 1.92666E-47 | 1.76106E-45 |
| TR3949-c0_g1  | 64  | 10 | 2.678071905 | 5.52752E-11 | 1.08391E-09 |
| TR10321-c4_g1 | 211 | 33 | 2.676705069 | 1.1667E-32  | 7.31935E-31 |
| TR14515-c0_g1 | 38  | 6  | 2.662965013 | 4.74983E-07 | 5.80125E-06 |
| TR20177-c0_g1 | 19  | 3  | 2.662965013 | 0.00036934  | 0.002549442 |
| TR21734-c0_g1 | 19  | 3  | 2.662965013 | 0.00036934  | 0.002549442 |
| TR22384-c0_g1 | 19  | 3  | 2.662965013 | 0.00036934  | 0.002549442 |
| TR22654-c0_g2 | 19  | 3  | 2.662965013 | 0.00036934  | 0.002549442 |
| TR24524-c0_g1 | 19  | 3  | 2.662965013 | 0.00036934  | 0.002549442 |
| TR25298-c0_g1 | 19  | 3  | 2.662965013 | 0.00036934  | 0.002549442 |
| TR640-c0_g1   | 19  | 3  | 2.662965013 | 0.00036934  | 0.002549442 |
| TR9331-c0_g1  | 19  | 3  | 2.662965013 | 0.00036934  | 0.002549442 |
| TR942-c0_g1   | 19  | 3  | 2.662965013 | 0.00036934  | 0.002549442 |
| TR9865-c0_g1  | 19  | 3  | 2.662965013 | 0.00036934  | 0.002549442 |
| TR13310-c0_g1 | 44  | 7  | 2.652076697 | 6.40655E-08 | 8.81942E-07 |
| TR18947-c0_g1 | 44  | 7  | 2.652076697 | 6.40655E-08 | 8.81942E-07 |
| TR22951-c0_g1 | 50  | 8  | 2.64385619  | 8.70729E-09 | 1.3409E-07  |
| TR24126-c0_g4 | 25  | 4  | 2.64385619  | 4.72616E-05 | 0.000401755 |
| TR4288-c0_g1  | 25  | 4  | 2.64385619  | 4.72616E-05 | 0.000401755 |
| TR14955-c0_g1 | 131 | 21 | 2.641105579 | 1.29214E-20 | 4.78608E-19 |
| TR24332-c0_g2 | 31  | 5  | 2.632268215 | 6.1878E-06  | 6.28815E-05 |
| TR12181-c0_g1 | 37  | 6  | 2.624490865 | 8.22736E-07 | 9.66662E-06 |
| TR19926-c0_g1 | 37  | 6  | 2.624490865 | 8.22736E-07 | 9.66662E-06 |
| TR3112-c0_g1  | 37  | 6  | 2.624490865 | 8.22736E-07 | 9.66662E-06 |
| TR14819-c0_g1 | 49  | 8  | 2.614709844 | 1.49964E-08 | 2.23256E-07 |
| TR20289-c0_g1 | 120 | 20 | 2.584962501 | 1.32114E-18 | 4.36139E-17 |
| TR11118-c0_g1 | 84  | 14 | 2.584962501 | 1.76089E-13 | 4.29519E-12 |
| TR15031-c0_g1 | 48  | 8  | 2.584962501 | 2.57753E-08 | 3.74862E-07 |
| TR8163-c0_g1  | 48  | 8  | 2.584962501 | 2.57753E-08 | 3.74862E-07 |
| TR18042-c0_g1 | 36  | 6  | 2.584962501 | 1.4215E-06  | 1.5952E-05  |
| TR18067-c0_g1 | 36  | 6  | 2.584962501 | 1.4215E-06  | 1.5952E-05  |
| TR329-c0_g1   | 36  | 6  | 2.584962501 | 1.4215E-06  | 1.5952E-05  |
| TR6813-c0_g1  | 36  | 6  | 2.584962501 | 1.4215E-06  | 1.5952E-05  |
| TR23971-c0_g1 | 30  | 5  | 2.584962501 | 1.07345E-05 | 0.000104585 |
| TR9289-c0_g1  | 30  | 5  | 2.584962501 | 1.07345E-05 | 0.000104585 |
| TR13645-c0_g1 | 24  | 4  | 2.584962501 | 8.24713E-05 | 0.000666091 |
| TR19035-c0_g2 | 24  | 4  | 2.584962501 | 8.24713E-05 | 0.000666091 |
| TR25313-c0_g1 | 24  | 4  | 2.584962501 | 8.24713E-05 | 0.000666091 |
| TR4832-c0_g1  | 24  | 4  | 2.584962501 | 8.24713E-05 | 0.000666091 |
| TR11924-c0_g1 | 18  | 3  | 2.584962501 | 0.000650525 | 0.004168785 |
| TR14517-c0_g1 | 18  | 3  | 2.584962501 | 0.000650525 | 0.004168785 |
| TR14616-c0_g1 | 18  | 3  | 2.584962501 | 0.000650525 | 0.004168785 |
| TR14740-c0_g1 | 18  | 3  | 2.584962501 | 0.000650525 | 0.004168785 |
| TR14851-c0_g1 | 18  | 3  | 2.584962501 | 0.000650525 | 0.004168785 |



|               |     |    |             |             |             |
|---------------|-----|----|-------------|-------------|-------------|
| TR16945-c0_g1 | 18  | 3  | 2.584962501 | 0.000650525 | 0.004168785 |
| TR21232-c1_g1 | 18  | 3  | 2.584962501 | 0.000650525 | 0.004168785 |
| TR21984-c0_g1 | 18  | 3  | 2.584962501 | 0.000650525 | 0.004168785 |
| TR23616-c0_g1 | 18  | 3  | 2.584962501 | 0.000650525 | 0.004168785 |
| TR27350-c0_g1 | 18  | 3  | 2.584962501 | 0.000650525 | 0.004168785 |
| TR3607-c0_g2  | 18  | 3  | 2.584962501 | 0.000650525 | 0.004168785 |
| TR5181-c0_g1  | 18  | 3  | 2.584962501 | 0.000650525 | 0.004168785 |
| TR8033-c0_g1  | 18  | 3  | 2.584962501 | 0.000650525 | 0.004168785 |
| TR8264-c0_g3  | 18  | 3  | 2.584962501 | 0.000650525 | 0.004168785 |
| TR8766-c0_g1  | 18  | 3  | 2.584962501 | 0.000650525 | 0.004168785 |
| TR27329-c0_g1 | 71  | 12 | 2.564784619 | 1.56072E-11 | 3.22409E-10 |
| TR19883-c0_g1 | 47  | 8  | 2.554588852 | 4.4207E-08  | 6.25273E-07 |
| TR4072-c0_g1  | 129 | 22 | 2.551795637 | 1.27971E-19 | 4.4952E-18  |
| TR11250-c0_g1 | 41  | 7  | 2.550197083 | 3.27468E-07 | 4.11485E-06 |
| TR7253-c0_g1  | 41  | 7  | 2.550197083 | 3.27468E-07 | 4.11485E-06 |
| TR3454-c0_g1  | 76  | 13 | 2.547487795 | 3.68092E-12 | 8.12733E-11 |
| TR8513-c0_g1  | 76  | 13 | 2.547487795 | 3.68092E-12 | 8.12733E-11 |
| TR13673-c0_g1 | 29  | 5  | 2.5360529   | 1.85649E-05 | 0.000173422 |
| TR1458-c0_g1  | 29  | 5  | 2.5360529   | 1.85649E-05 | 0.000173422 |
| TR1515-c0_g1  | 29  | 5  | 2.5360529   | 1.85649E-05 | 0.000173422 |
| TR18160-c0_g1 | 29  | 5  | 2.5360529   | 1.85649E-05 | 0.000173422 |
| TR5272-c0_g1  | 29  | 5  | 2.5360529   | 1.85649E-05 | 0.000173422 |
| TR2946-c0_g1  | 69  | 12 | 2.523561956 | 4.52559E-11 | 8.95705E-10 |
| TR12317-c0_g1 | 23  | 4  | 2.523561956 | 0.0001434   | 0.001092289 |
| TR19035-c0_g1 | 23  | 4  | 2.523561956 | 0.0001434   | 0.001092289 |
| TR26980-c0_g1 | 23  | 4  | 2.523561956 | 0.0001434   | 0.001092289 |
| TR27215-c0_g1 | 23  | 4  | 2.523561956 | 0.0001434   | 0.001092289 |
| TR2982-c0_g1  | 23  | 4  | 2.523561956 | 0.0001434   | 0.001092289 |
| TR16294-c0_g1 | 40  | 7  | 2.514573173 | 5.61365E-07 | 6.82197E-06 |
| TR17979-c0_g1 | 119 | 21 | 2.502500341 | 7.46245E-18 | 2.3848E-16  |
| TR13709-c0_g1 | 34  | 6  | 2.502500341 | 4.2087E-06  | 4.37636E-05 |
| TR4938-c0_g1  | 34  | 6  | 2.502500341 | 4.2087E-06  | 4.37636E-05 |
| TR4959-c0_g1  | 34  | 6  | 2.502500341 | 4.2087E-06  | 4.37636E-05 |
| TR13343-c0_g1 | 17  | 3  | 2.502500341 | 0.001140981 | 0.006775478 |
| TR1363-c0_g1  | 17  | 3  | 2.502500341 | 0.001140981 | 0.006775478 |
| TR15915-c0_g1 | 17  | 3  | 2.502500341 | 0.001140981 | 0.006775478 |
| TR18194-c0_g1 | 17  | 3  | 2.502500341 | 0.001140981 | 0.006775478 |
| TR1990-c0_g1  | 17  | 3  | 2.502500341 | 0.001140981 | 0.006775478 |
| TR20177-c0_g2 | 17  | 3  | 2.502500341 | 0.001140981 | 0.006775478 |
| TR2109-c0_g2  | 17  | 3  | 2.502500341 | 0.001140981 | 0.006775478 |
| TR24062-c0_g1 | 17  | 3  | 2.502500341 | 0.001140981 | 0.006775478 |
| TR2428-c0_g1  | 17  | 3  | 2.502500341 | 0.001140981 | 0.006775478 |
| TR24332-c0_g1 | 17  | 3  | 2.502500341 | 0.001140981 | 0.006775478 |
| TR25734-c0_g2 | 17  | 3  | 2.502500341 | 0.001140981 | 0.006775478 |

|                |      |     |             |             |             |
|----------------|------|-----|-------------|-------------|-------------|
| TR3964-c0_g1   | 17   | 3   | 2.502500341 | 0.001140981 | 0.006775478 |
| TR485-c0_g1    | 17   | 3   | 2.502500341 | 0.001140981 | 0.006775478 |
| TR8365-c0_g1   | 17   | 3   | 2.502500341 | 0.001140981 | 0.006775478 |
| TR4912-c0_g2   | 62   | 11  | 2.494764692 | 5.58015E-10 | 9.872E-09   |
| TR10373-c3_g7  | 152  | 27  | 2.493040011 | 2.81269E-22 | 1.12516E-20 |
| TR626-c0_g1    | 140  | 25  | 2.485426827 | 1.40989E-20 | 5.21086E-19 |
| TR26401-c0_g1  | 84   | 15  | 2.485426827 | 5.87786E-13 | 1.36892E-11 |
| TR15176-c0_g1  | 28   | 5   | 2.485426827 | 3.20015E-05 | 0.000285001 |
| TR18851-c0_g1  | 28   | 5   | 2.485426827 | 3.20015E-05 | 0.000285001 |
| TR22373-c0_g3  | 28   | 5   | 2.485426827 | 3.20015E-05 | 0.000285001 |
| TR26915-c0_g1  | 28   | 5   | 2.485426827 | 3.20015E-05 | 0.000285001 |
| TR3276-c0_g1   | 28   | 5   | 2.485426827 | 3.20015E-05 | 0.000285001 |
| TR477-c0_g1    | 28   | 5   | 2.485426827 | 3.20015E-05 | 0.000285001 |
| TR3474-c0_g1   | 162  | 29  | 2.481869008 | 1.59587E-23 | 6.73249E-22 |
| TR15613-c0_g1  | 39   | 7   | 2.478047297 | 9.5978E-07  | 1.11764E-05 |
| TR26197-c1_g1  | 39   | 7   | 2.478047297 | 9.5978E-07  | 1.11764E-05 |
| TR1637-c0_g1   | 150  | 27  | 2.473931188 | 7.97349E-22 | 3.15255E-20 |
| TR19904-c0_g1  | 144  | 26  | 2.469485283 | 5.6414E-21  | 2.14567E-19 |
| TR3440-c0_g1   | 155  | 28  | 2.468769483 | 1.89665E-22 | 7.6775E-21  |
| TR16398-c0_g1  | 44   | 8   | 2.459431619 | 2.19956E-07 | 2.81677E-06 |
| TR6248-c0_g1   | 44   | 8   | 2.459431619 | 2.19956E-07 | 2.81677E-06 |
| TR15474-c0_g1  | 33   | 6   | 2.459431619 | 7.20961E-06 | 7.25283E-05 |
| TR1129-c0_g1   | 22   | 4   | 2.459431619 | 0.000248369 | 0.001784075 |
| TR13969-c0_g1  | 22   | 4   | 2.459431619 | 0.000248369 | 0.001784075 |
| TR16327-c0_g1  | 22   | 4   | 2.459431619 | 0.000248369 | 0.001784075 |
| TR17527-c0_g1  | 22   | 4   | 2.459431619 | 0.000248369 | 0.001784075 |
| TR2251-c1_g1   | 22   | 4   | 2.459431619 | 0.000248369 | 0.001784075 |
| TR5934-c0_g1   | 22   | 4   | 2.459431619 | 0.000248369 | 0.001784075 |
| TR3966-c0_g1   | 395  | 72  | 2.455783842 | 2.7969E-54  | 3.00956E-52 |
| TR20361-c0_g1  | 1484 | 272 | 2.447812535 | 4.5883E-198 | 2.0002E-195 |
| TR16136-c0_g1  | 60   | 11  | 2.447458977 | 1.6025E-09  | 2.68155E-08 |
| TR10321-c4_g10 | 321  | 59  | 2.443786438 | 3.37061E-44 | 2.8229E-42  |
| TR10321-c4_g12 | 54   | 10  | 2.432959407 | 1.16893E-08 | 1.76651E-07 |
| TR13393-c0_g1  | 27   | 5   | 2.432959407 | 5.4967E-05  | 0.00046126  |
| TR14465-c0_g1  | 43   | 8   | 2.426264755 | 3.73635E-07 | 4.66394E-06 |
| TR19761-c0_g1  | 43   | 8   | 2.426264755 | 3.73635E-07 | 4.66394E-06 |
| TR16168-c0_g1  | 64   | 12  | 2.415037499 | 6.28789E-10 | 1.10665E-08 |
| TR27483-c0_g1  | 48   | 9   | 2.415037499 | 8.5728E-08  | 1.1595E-06  |
| TR7545-c0_g1   | 48   | 9   | 2.415037499 | 8.5728E-08  | 1.1595E-06  |
| TR27804-c0_g1  | 32   | 6   | 2.415037499 | 1.23104E-05 | 0.000118378 |
| TR4959-c0_g2   | 32   | 6   | 2.415037499 | 1.23104E-05 | 0.000118378 |
| TR10742-c0_g1  | 16   | 3   | 2.415037499 | 0.001991715 | 0.010888033 |
| TR13688-c0_g1  | 16   | 3   | 2.415037499 | 0.001991715 | 0.010888033 |

|                |      |     |             |             |             |
|----------------|------|-----|-------------|-------------|-------------|
| TR17834-c0_g1  | 16   | 3   | 2.415037499 | 0.001991715 | 0.010888033 |
| TR18442-c0_g1  | 16   | 3   | 2.415037499 | 0.001991715 | 0.010888033 |
| TR19557-c0_g1  | 16   | 3   | 2.415037499 | 0.001991715 | 0.010888033 |
| TR24976-c0_g1  | 16   | 3   | 2.415037499 | 0.001991715 | 0.010888033 |
| TR25505-c0_g1  | 16   | 3   | 2.415037499 | 0.001991715 | 0.010888033 |
| TR27609-c0_g1  | 16   | 3   | 2.415037499 | 0.001991715 | 0.010888033 |
| TR3573-c0_g1   | 16   | 3   | 2.415037499 | 0.001991715 | 0.010888033 |
| TR5608-c0_g1   | 16   | 3   | 2.415037499 | 0.001991715 | 0.010888033 |
| TR7586-c0_g1   | 16   | 3   | 2.415037499 | 0.001991715 | 0.010888033 |
| TR18847-c0_g1  | 1463 | 275 | 2.411426246 | 6.3299E-192 | 2.6904E-189 |
| TR20314-c0_g1  | 74   | 14  | 2.402098444 | 3.41342E-11 | 6.86778E-10 |
| TR13200-c0_g1  | 37   | 7   | 2.402098444 | 2.78176E-06 | 3.00467E-05 |
| TR13810-c3_g3  | 37   | 7   | 2.402098444 | 2.78176E-06 | 3.00467E-05 |
| TR13765-c0_g1  | 63   | 12  | 2.392317423 | 1.05837E-09 | 1.81754E-08 |
| TR13727-c0_g1  | 42   | 8   | 2.392317423 | 6.32972E-07 | 7.65933E-06 |
| TR14652-c0_g2  | 21   | 4   | 2.392317423 | 0.000428331 | 0.002917546 |
| TR21311-c2_g2  | 21   | 4   | 2.392317423 | 0.000428331 | 0.002917546 |
| TR3591-c0_g1   | 21   | 4   | 2.392317423 | 0.000428331 | 0.002917546 |
| TR4176-c0_g1   | 21   | 4   | 2.392317423 | 0.000428331 | 0.002917546 |
| TR21952-c0_g1  | 52   | 10  | 2.378511623 | 3.32901E-08 | 4.80455E-07 |
| TR26394-c0_g1  | 26   | 5   | 2.378511623 | 9.40516E-05 | 0.00075141  |
| TR26874-c0_g1  | 26   | 5   | 2.378511623 | 9.40516E-05 | 0.00075141  |
| TR3538-c0_g1   | 26   | 5   | 2.378511623 | 9.40516E-05 | 0.00075141  |
| TR25382-c0_g2  | 291  | 56  | 2.377520421 | 5.3094E-39  | 3.97651E-37 |
| TR886-c0_g1    | 135  | 26  | 2.376375879 | 5.85255E-19 | 1.97423E-17 |
| TR10321-c5_g6  | 259  | 50  | 2.372952098 | 7.9805E-35  | 5.51541E-33 |
| TR17638-c0_g1  | 31   | 6   | 2.36923381  | 2.09475E-05 | 0.000193342 |
| TR406-c0_g1    | 31   | 6   | 2.36923381  | 2.09475E-05 | 0.000193342 |
| TR24235-c0_g1  | 797  | 155 | 2.362311509 | 6.4256E-103 | 1.3162E-100 |
| TR10106-c3_g1  | 413  | 81  | 2.350147969 | 6.84225E-54 | 7.13665E-52 |
| TR26149-c0_g1  | 56   | 11  | 2.347923303 | 1.2894E-08  | 1.93653E-07 |
| TR10365-c1_g4  | 183  | 36  | 2.345774837 | 9.02281E-25 | 4.04749E-23 |
| TR13814-c2_g5  | 620  | 122 | 2.345387068 | 8.40995E-80 | 1.36172E-77 |
| TR10587-c0_g4  | 578  | 114 | 2.342035668 | 2.1412E-74  | 3.22152E-72 |
| TR10321-c4_g13 | 166  | 33  | 2.330645312 | 1.86152E-22 | 7.55329E-21 |
| TR15872-c0_g1  | 166  | 33  | 2.330645312 | 1.86152E-22 | 7.55329E-21 |
| TR17611-c0_g1  | 375  | 75  | 2.321928095 | 2.06538E-48 | 1.92935E-46 |
| TR20311-c0_g3  | 85   | 17  | 2.321928095 | 3.39818E-12 | 7.5324E-11  |
| TR20641-c0_g1  | 65   | 13  | 2.321928095 | 1.15433E-09 | 1.9704E-08  |
| TR146-c0_g1    | 40   | 8   | 2.321928095 | 1.80093E-06 | 2.00256E-05 |
| TR26762-c0_g1  | 40   | 8   | 2.321928095 | 1.80093E-06 | 2.00256E-05 |
| TR4938-c0_g2   | 35   | 7   | 2.321928095 | 7.96246E-06 | 7.91651E-05 |
| TR8517-c3_g1   | 35   | 7   | 2.321928095 | 7.96246E-06 | 7.91651E-05 |
| TR9376-c0_g1   | 35   | 7   | 2.321928095 | 7.96246E-06 | 7.91651E-05 |

|               |     |     |             |             |             |
|---------------|-----|-----|-------------|-------------|-------------|
| TR10545-c0_g1 | 30  | 6   | 2.321928095 | 3.55138E-05 | 0.000314268 |
| TR3591-c0_g2  | 30  | 6   | 2.321928095 | 3.55138E-05 | 0.000314268 |
| TR578-c0_g1   | 30  | 6   | 2.321928095 | 3.55138E-05 | 0.000314268 |
| TR8803-c0_g1  | 30  | 6   | 2.321928095 | 3.55138E-05 | 0.000314268 |
| TR17454-c0_g1 | 25  | 5   | 2.321928095 | 0.000160261 | 0.001209342 |
| TR4678-c0_g1  | 25  | 5   | 2.321928095 | 0.000160261 | 0.001209342 |
| TR6808-c0_g1  | 25  | 5   | 2.321928095 | 0.000160261 | 0.001209342 |
| TR6963-c0_g1  | 25  | 5   | 2.321928095 | 0.000160261 | 0.001209342 |
| TR13503-c0_g1 | 20  | 4   | 2.321928095 | 0.000735202 | 0.004672677 |
| TR15295-c1_g2 | 20  | 4   | 2.321928095 | 0.000735202 | 0.004672677 |
| TR4080-c0_g1  | 20  | 4   | 2.321928095 | 0.000735202 | 0.004672677 |
| TR5066-c0_g1  | 20  | 4   | 2.321928095 | 0.000735202 | 0.004672677 |
| TR5945-c0_g1  | 20  | 4   | 2.321928095 | 0.000735202 | 0.004672677 |
| TR681-c0_g1   | 20  | 4   | 2.321928095 | 0.000735202 | 0.004672677 |
| TR10151-c0_g1 | 15  | 3   | 2.321928095 | 0.003458025 | 0.017261009 |
| TR16502-c0_g1 | 15  | 3   | 2.321928095 | 0.003458025 | 0.017261009 |
| TR18951-c0_g1 | 15  | 3   | 2.321928095 | 0.003458025 | 0.017261009 |
| TR25176-c0_g2 | 15  | 3   | 2.321928095 | 0.003458025 | 0.017261009 |
| TR25313-c0_g2 | 15  | 3   | 2.321928095 | 0.003458025 | 0.017261009 |
| TR26584-c0_g1 | 15  | 3   | 2.321928095 | 0.003458025 | 0.017261009 |
| TR8033-c0_g2  | 15  | 3   | 2.321928095 | 0.003458025 | 0.017261009 |
| TR8171-c0_g1  | 15  | 3   | 2.321928095 | 0.003458025 | 0.017261009 |
| TR610-c1_g1   | 184 | 37  | 2.31410859  | 1.61438E-24 | 7.12899E-23 |
| TR10319-c3_g1 | 49  | 10  | 2.292781749 | 1.57097E-07 | 2.06888E-06 |
| TR22908-c0_g1 | 44  | 9   | 2.289506617 | 6.87217E-07 | 8.21884E-06 |
| TR13359-c3_g1 | 361 | 74  | 2.286401661 | 7.79573E-46 | 6.86724E-44 |
| TR22065-c0_g1 | 439 | 90  | 2.286224033 | 2.37658E-55 | 2.67582E-53 |
| TR13659-c0_g1 | 78  | 16  | 2.285402219 | 4.01981E-11 | 7.9839E-10  |
| TR10293-c0_g3 | 107 | 22  | 2.282035368 | 1.09951E-14 | 2.90718E-13 |
| TR24758-c0_g1 | 97  | 20  | 2.277984747 | 1.99386E-13 | 4.84261E-12 |
| TR3161-c0_g1  | 58  | 12  | 2.273018494 | 1.38538E-08 | 2.06971E-07 |
| TR14833-c0_g1 | 29  | 6   | 2.273018494 | 5.99729E-05 | 0.000500058 |
| TR18785-c0_g1 | 29  | 6   | 2.273018494 | 5.99729E-05 | 0.000500058 |
| TR24474-c0_g1 | 29  | 6   | 2.273018494 | 5.99729E-05 | 0.000500058 |
| TR27114-c0_g1 | 193 | 40  | 2.270528942 | 4.36063E-25 | 1.98226E-23 |
| TR3954-c3_g1  | 702 | 146 | 2.265502661 | 1.8145E-86  | 3.35315E-84 |
| TR12317-c0_g2 | 24  | 5   | 2.263034406 | 0.000271856 | 0.001940348 |
| TR16176-c0_g1 | 24  | 5   | 2.263034406 | 0.000271856 | 0.001940348 |
| TR17371-c0_g1 | 24  | 5   | 2.263034406 | 0.000271856 | 0.001940348 |
| TR20202-c0_g2 | 24  | 5   | 2.263034406 | 0.000271856 | 0.001940348 |
| TR21563-c0_g1 | 24  | 5   | 2.263034406 | 0.000271856 | 0.001940348 |
| TR22084-c0_g1 | 24  | 5   | 2.263034406 | 0.000271856 | 0.001940348 |
| TR23665-c0_g3 | 24  | 5   | 2.263034406 | 0.000271856 | 0.001940348 |
| TR3789-c1_g1  | 24  | 5   | 2.263034406 | 0.000271856 | 0.001940348 |

|               |     |     |             |             |             |
|---------------|-----|-----|-------------|-------------|-------------|
| TR5199-c0_g1  | 91  | 19  | 2.259867127 | 1.40672E-12 | 3.2059E-11  |
| TR15136-c0_g1 | 158 | 33  | 2.259386629 | 1.03292E-20 | 3.84266E-19 |
| TR14757-c0_g1 | 43  | 9   | 2.256339753 | 1.14814E-06 | 1.32248E-05 |
| TR4652-c0_g1  | 358 | 75  | 2.254997087 | 9.88893E-45 | 8.36442E-43 |
| TR12837-c0_g1 | 57  | 12  | 2.247927513 | 2.30137E-08 | 3.37296E-07 |
| TR1049-c0_g1  | 38  | 8   | 2.247927513 | 5.06013E-06 | 5.19498E-05 |
| TR15605-c0_g1 | 38  | 8   | 2.247927513 | 5.06013E-06 | 5.19498E-05 |
| TR26291-c0_g2 | 38  | 8   | 2.247927513 | 5.06013E-06 | 5.19498E-05 |
| TR6132-c0_g1  | 38  | 8   | 2.247927513 | 5.06013E-06 | 5.19498E-05 |
| TR6839-c0_g1  | 38  | 8   | 2.247927513 | 5.06013E-06 | 5.19498E-05 |
| TR14652-c0_g1 | 19  | 4   | 2.247927513 | 0.001255357 | 0.007372276 |
| TR15295-c1_g5 | 19  | 4   | 2.247927513 | 0.001255357 | 0.007372276 |
| TR15332-c0_g1 | 19  | 4   | 2.247927513 | 0.001255357 | 0.007372276 |
| TR22654-c0_g1 | 19  | 4   | 2.247927513 | 0.001255357 | 0.007372276 |
| TR24899-c0_g1 | 19  | 4   | 2.247927513 | 0.001255357 | 0.007372276 |
| TR26439-c0_g1 | 19  | 4   | 2.247927513 | 0.001255357 | 0.007372276 |
| TR26442-c0_g1 | 19  | 4   | 2.247927513 | 0.001255357 | 0.007372276 |
| TR27130-c0_g1 | 19  | 4   | 2.247927513 | 0.001255357 | 0.007372276 |
| TR3568-c0_g1  | 19  | 4   | 2.247927513 | 0.001255357 | 0.007372276 |
| TR6284-c0_g1  | 19  | 4   | 2.247927513 | 0.001255357 | 0.007372276 |
| TR8484-c0_g1  | 19  | 4   | 2.247927513 | 0.001255357 | 0.007372276 |
| TR9525-c0_g1  | 19  | 4   | 2.247927513 | 0.001255357 | 0.007372276 |
| TR15551-c0_g1 | 33  | 7   | 2.237039197 | 2.24755E-05 | 0.000206213 |
| TR14762-c2_g1 | 707 | 150 | 2.236747714 | 9.78206E-86 | 1.76923E-83 |
| TR3766-c0_g1  | 61  | 13  | 2.230297619 | 8.80662E-09 | 1.35375E-07 |
| TR10293-c0_g7 | 159 | 34  | 2.225420114 | 1.78259E-20 | 6.54564E-19 |
| TR7519-c0_g1  | 28  | 6   | 2.222392421 | 0.000100853 | 0.000799735 |
| TR8077-c0_g1  | 28  | 6   | 2.222392421 | 0.000100853 | 0.000799735 |
| TR14687-c0_g1 | 107 | 23  | 2.21790503  | 3.14655E-14 | 8.06871E-13 |
| TR10321-c4_g2 | 79  | 17  | 2.216317907 | 7.00293E-11 | 1.34988E-09 |
| TR12600-c0_g1 | 784 | 169 | 2.213830408 | 1.09659E-93 | 2.16784E-91 |
| TR20311-c0_g2 | 88  | 19  | 2.211504105 | 6.30045E-12 | 1.36628E-10 |
| TR19884-c0_g1 | 125 | 27  | 2.210896782 | 2.61718E-16 | 7.72492E-15 |
| TR7776-c0_g1  | 37  | 8   | 2.209453366 | 8.4386E-06  | 8.36057E-05 |
| TR16522-c0_g1 | 60  | 13  | 2.206450877 | 1.45529E-08 | 2.17225E-07 |
| TR15016-c0_g1 | 46  | 10  | 2.201633861 | 7.23444E-07 | 8.58305E-06 |
| TR10371-c0_g1 | 23  | 5   | 2.201633861 | 0.000458919 | 0.003071373 |
| TR11921-c0_g1 | 23  | 5   | 2.201633861 | 0.000458919 | 0.003071373 |
| TR22384-c0_g2 | 23  | 5   | 2.201633861 | 0.000458919 | 0.003071373 |
| TR25176-c0_g1 | 23  | 5   | 2.201633861 | 0.000458919 | 0.003071373 |
| TR2636-c0_g1  | 23  | 5   | 2.201633861 | 0.000458919 | 0.003071373 |
| TR5251-c0_g1  | 23  | 5   | 2.201633861 | 0.000458919 | 0.003071373 |
| TR14491-c0_g1 | 55  | 12  | 2.196397213 | 6.30333E-08 | 8.70552E-07 |
| TR13277-c0_g1 | 32  | 7   | 2.192645078 | 3.75436E-05 | 0.000330549 |

|                |     |     |             |             |             |
|----------------|-----|-----|-------------|-------------|-------------|
| TR21729-c0_g1  | 41  | 9   | 2.187627003 | 3.17448E-06 | 3.40507E-05 |
| TR8464-c0_g1   | 200 | 44  | 2.184424571 | 8.52959E-25 | 3.83636E-23 |
| TR19859-c0_g1  | 199 | 44  | 2.177193002 | 1.39002E-24 | 6.17027E-23 |
| TR8501-c0_g1   | 252 | 56  | 2.169925001 | 1.43243E-30 | 8.39768E-29 |
| TR10318-c1_g14 | 207 | 46  | 2.169925001 | 2.09308E-25 | 9.69623E-24 |
| TR15433-c0_g1  | 108 | 24  | 2.169925001 | 5.33596E-14 | 1.34398E-12 |
| TR17356-c0_g1  | 81  | 18  | 2.169925001 | 7.24931E-11 | 1.39421E-09 |
| TR26943-c0_g1  | 63  | 14  | 2.169925001 | 9.13756E-09 | 1.40208E-07 |
| TR19409-c0_g1  | 54  | 12  | 2.169925001 | 1.0391E-07  | 1.3908E-06  |
| TR17978-c0_g1  | 36  | 8   | 2.169925001 | 1.40214E-05 | 0.000133738 |
| TR3908-c0_g1   | 36  | 8   | 2.169925001 | 1.40214E-05 | 0.000133738 |
| TR13162-c0_g1  | 27  | 6   | 2.169925001 | 0.000168837 | 0.001268425 |
| TR8093-c0_g1   | 27  | 6   | 2.169925001 | 0.000168837 | 0.001268425 |
| TR13994-c0_g1  | 18  | 4   | 2.169925001 | 0.002131187 | 0.011448734 |
| TR15321-c0_g1  | 18  | 4   | 2.169925001 | 0.002131187 | 0.011448734 |
| TR19481-c0_g1  | 18  | 4   | 2.169925001 | 0.002131187 | 0.011448734 |
| TR21578-c0_g2  | 18  | 4   | 2.169925001 | 0.002131187 | 0.011448734 |
| TR23699-c0_g1  | 18  | 4   | 2.169925001 | 0.002131187 | 0.011448734 |
| TR3999-c0_g1   | 18  | 4   | 2.169925001 | 0.002131187 | 0.011448734 |
| TR7212-c0_g1   | 18  | 4   | 2.169925001 | 0.002131187 | 0.011448734 |
| TR7740-c0_g1   | 18  | 4   | 2.169925001 | 0.002131187 | 0.011448734 |
| TR9057-c0_g2   | 18  | 4   | 2.169925001 | 0.002131187 | 0.011448734 |
| TR9300-c0_g1   | 18  | 4   | 2.169925001 | 0.002131187 | 0.011448734 |
| TR11273-c0_g1  | 80  | 18  | 2.152003093 | 1.18619E-10 | 2.23953E-09 |
| TR26456-c0_g1  | 40  | 9   | 2.152003093 | 5.25193E-06 | 5.37891E-05 |
| TR14464-c0_g1  | 31  | 7   | 2.146841388 | 6.24534E-05 | 0.0005182   |
| TR26399-c0_g1  | 31  | 7   | 2.146841388 | 6.24534E-05 | 0.0005182   |
| TR27114-c0_g2  | 84  | 19  | 2.144389909 | 4.53997E-11 | 8.97506E-10 |
| TR22934-c0_g1  | 128 | 29  | 2.142019005 | 4.53026E-16 | 1.31884E-14 |
| TR5571-c0_g2   | 75  | 17  | 2.141355849 | 5.07144E-10 | 9.06637E-09 |
| TR15942-c0_g1  | 110 | 25  | 2.137503524 | 5.45778E-14 | 1.36858E-12 |
| TR24238-c0_g1  | 44  | 10  | 2.137503524 | 1.97234E-06 | 2.17319E-05 |
| TR11829-c0_g1  | 22  | 5   | 2.137503524 | 0.000770618 | 0.00487408  |
| TR20387-c0_g1  | 22  | 5   | 2.137503524 | 0.000770618 | 0.00487408  |
| TR359-c0_g1    | 22  | 5   | 2.137503524 | 0.000770618 | 0.00487408  |
| TR76-c0_g2     | 22  | 5   | 2.137503524 | 0.000770618 | 0.00487408  |
| TR10785-c0_g2  | 57  | 13  | 2.132450296 | 6.4698E-08  | 8.88168E-07 |
| TR13814-c2_g2  | 455 | 104 | 2.129283017 | 1.41891E-52 | 1.43591E-50 |
| TR21333-c0_g1  | 35  | 8   | 2.129283017 | 2.32081E-05 | 0.000212019 |
| TR4079-c0_g1   | 35  | 8   | 2.129283017 | 2.32081E-05 | 0.000212019 |
| TR8905-c0_g1   | 35  | 8   | 2.129283017 | 2.32081E-05 | 0.000212019 |
| TR3435-c0_g1   | 354 | 81  | 2.127755547 | 2.94942E-41 | 2.34318E-39 |
| TR13672-c0_g1  | 61  | 14  | 2.123382416 | 2.45369E-08 | 3.57464E-07 |
| TR22912-c0_g1  | 52  | 12  | 2.115477217 | 2.80039E-07 | 3.53718E-06 |

|                |     |     |             |             |             |
|----------------|-----|-----|-------------|-------------|-------------|
| TR11034-c0_g1  | 39  | 9   | 2.115477217 | 8.65783E-06 | 8.53867E-05 |
| TR15451-c0_g1  | 39  | 9   | 2.115477217 | 8.65783E-06 | 8.53867E-05 |
| TR16851-c0_g1  | 39  | 9   | 2.115477217 | 8.65783E-06 | 8.53867E-05 |
| TR11945-c0_g1  | 26  | 6   | 2.115477217 | 0.000281287 | 0.001998436 |
| TR24242-c0_g1  | 26  | 6   | 2.115477217 | 0.000281287 | 0.001998436 |
| TR12128-c0_g15 | 56  | 13  | 2.106915204 | 1.05825E-07 | 1.41215E-06 |
| TR7524-c0_g1   | 43  | 10  | 2.10433666  | 3.24056E-06 | 3.4631E-05  |
| TR19409-c0_g2  | 103 | 24  | 2.101538026 | 6.091E-13   | 1.41662E-11 |
| TR10560-c0_g1  | 60  | 14  | 2.099535674 | 4.00563E-08 | 5.70361E-07 |
| TR19465-c0_g2  | 30  | 7   | 2.099535674 | 0.000103433 | 0.000816385 |
| TR13814-c2_g8  | 268 | 63  | 2.088809267 | 6.073E-31   | 3.59753E-29 |
| TR8362-c0_g2   | 34  | 8   | 2.087462841 | 3.82578E-05 | 0.000335448 |
| TR16720-c0_g2  | 17  | 4   | 2.087462841 | 0.003594985 | 0.017762134 |
| TR20123-c0_g1  | 17  | 4   | 2.087462841 | 0.003594985 | 0.017762134 |
| TR21368-c0_g1  | 17  | 4   | 2.087462841 | 0.003594985 | 0.017762134 |
| TR21946-c0_g1  | 17  | 4   | 2.087462841 | 0.003594985 | 0.017762134 |
| TR24366-c0_g1  | 17  | 4   | 2.087462841 | 0.003594985 | 0.017762134 |
| TR24366-c0_g2  | 17  | 4   | 2.087462841 | 0.003594985 | 0.017762134 |
| TR2702-c0_g1   | 17  | 4   | 2.087462841 | 0.003594985 | 0.017762134 |
| TR3986-c0_g1   | 17  | 4   | 2.087462841 | 0.003594985 | 0.017762134 |
| TR6464-c0_g1   | 17  | 4   | 2.087462841 | 0.003594985 | 0.017762134 |
| TR8590-c0_g1   | 17  | 4   | 2.087462841 | 0.003594985 | 0.017762134 |
| TR10785-c0_g1  | 55  | 13  | 2.080919995 | 1.72613E-07 | 2.2505E-06  |
| TR471-c0_g1    | 604 | 143 | 2.078533403 | 3.84955E-67 | 5.11308E-65 |
| TR27130-c0_g2  | 38  | 9   | 2.078002512 | 1.42189E-05 | 0.000135353 |
| TR18843-c0_g1  | 59  | 14  | 2.075288127 | 6.52198E-08 | 8.92772E-07 |
| TR24205-c0_g1  | 59  | 14  | 2.075288127 | 6.52198E-08 | 8.92772E-07 |
| TR9482-c0_g1   | 59  | 14  | 2.075288127 | 6.52198E-08 | 8.92772E-07 |
| TR6488-c0_g1   | 42  | 10  | 2.070389328 | 5.30569E-06 | 5.43069E-05 |
| TR1307-c0_g2   | 21  | 5   | 2.070389328 | 0.001286609 | 0.007524612 |
| TR13710-c0_g1  | 21  | 5   | 2.070389328 | 0.001286609 | 0.007524612 |
| TR21729-c0_g2  | 21  | 5   | 2.070389328 | 0.001286609 | 0.007524612 |
| TR25208-c0_g1  | 21  | 5   | 2.070389328 | 0.001286609 | 0.007524612 |
| TR26981-c0_g1  | 21  | 5   | 2.070389328 | 0.001286609 | 0.007524612 |
| TR3912-c0_g1   | 21  | 5   | 2.070389328 | 0.001286609 | 0.007524612 |
| TR6454-c1_g1   | 595 | 142 | 2.066998739 | 1.05272E-65 | 1.37674E-63 |
| TR24038-c0_g1  | 46  | 11  | 2.064130337 | 1.98644E-06 | 2.1859E-05  |
| TR8068-c1_g2   | 46  | 11  | 2.064130337 | 1.98644E-06 | 2.1859E-05  |
| TR5613-c0_g1   | 146 | 35  | 2.060541542 | 2.63614E-17 | 8.22347E-16 |
| TR19694-c0_g1  | 100 | 24  | 2.058893689 | 2.57564E-12 | 5.75418E-11 |
| TR28-c0_g2     | 25  | 6   | 2.058893689 | 0.000466213 | 0.003103462 |
| TR2808-c0_g1   | 25  | 6   | 2.058893689 | 0.000466213 | 0.003103462 |
| TR3904-c0_g1   | 25  | 6   | 2.058893689 | 0.000466213 | 0.003103462 |
| TR916-c0_g1    | 25  | 6   | 2.058893689 | 0.000466213 | 0.003103462 |

|                |      |     |             |             |             |
|----------------|------|-----|-------------|-------------|-------------|
| TR23578-c0_g1  | 129  | 31  | 2.057030945 | 1.94377E-15 | 5.41748E-14 |
| TR26930-c0_g1  | 83   | 20  | 2.053111336 | 1.9559E-10  | 3.62233E-09 |
| TR1612-c0_g2   | 58   | 14  | 2.050626073 | 1.05903E-07 | 1.41215E-06 |
| TR19465-c0_g1  | 29   | 7   | 2.050626073 | 0.000170498 | 0.001278646 |
| TR26924-c0_g1  | 29   | 7   | 2.050626073 | 0.000170498 | 0.001278646 |
| TR21978-c0_g1  | 124  | 30  | 2.047305715 | 8.14624E-15 | 2.18105E-13 |
| TR27101-c0_g1  | 124  | 30  | 2.047305715 | 8.14624E-15 | 2.18105E-13 |
| TR18783-c0_g1  | 293  | 71  | 2.045009735 | 8.3901E-33  | 5.3027E-31  |
| TR3180-c0_g1   | 66   | 16  | 2.044394119 | 1.51525E-08 | 2.25382E-07 |
| TR16672-c0_g1  | 37   | 9   | 2.039528364 | 2.32599E-05 | 0.000212378 |
| TR10321-c4_g5  | 41   | 10  | 2.03562391  | 8.65517E-06 | 8.53867E-05 |
| TR12118-c0_g2  | 41   | 10  | 2.03562391  | 8.65517E-06 | 8.53867E-05 |
| TR8068-c0_g1   | 41   | 10  | 2.03562391  | 8.65517E-06 | 8.53867E-05 |
| TR11155-c0_g1  | 86   | 21  | 2.033947332 | 1.20188E-10 | 2.26035E-09 |
| TR26965-c0_g1  | 86   | 21  | 2.033947332 | 1.20188E-10 | 2.26035E-09 |
| TR620-c0_g1    | 86   | 21  | 2.033947332 | 1.20188E-10 | 2.26035E-09 |
| TR21423-c0_g5  | 135  | 33  | 2.032421478 | 7.39859E-16 | 2.11761E-14 |
| TR10092-c0_g1  | 45   | 11  | 2.032421478 | 3.23298E-06 | 3.4631E-05  |
| TR23993-c0_g1  | 45   | 11  | 2.032421478 | 3.23298E-06 | 3.4631E-05  |
| TR15997-c0_g1  | 49   | 12  | 2.029747343 | 1.21152E-06 | 1.38238E-05 |
| TR24205-c0_g3  | 57   | 14  | 2.025535092 | 1.71482E-07 | 2.23746E-06 |
| TR13979-c0_g1  | 61   | 15  | 2.023846742 | 6.47267E-08 | 8.88168E-07 |
| TR14779-c0_g1  | 61   | 15  | 2.023846742 | 6.47267E-08 | 8.88168E-07 |
| TR19551-c4_g1  | 61   | 15  | 2.023846742 | 6.47267E-08 | 8.88168E-07 |
| TR18728-c0_g1  | 65   | 16  | 2.022367813 | 2.44764E-08 | 3.56888E-07 |
| TR2565-c0_g1   | 65   | 16  | 2.022367813 | 2.44764E-08 | 3.56888E-07 |
| TR18770-c11_g1 | 2432 | 607 | 2.002374807 | 2.9266E-252 | 1.7157E-249 |
| TR9463-c0_g1   | 68   | 17  | 2           | 1.49239E-08 | 2.22371E-07 |
| TR1679-c0_g1   | 60   | 15  | 2           | 1.04388E-07 | 1.39414E-06 |
| TR10445-c0_g1  | 56   | 14  | 2           | 2.76865E-07 | 3.50228E-06 |
| TR16522-c0_g2  | 56   | 14  | 2           | 2.76865E-07 | 3.50228E-06 |
| TR15640-c0_g1  | 52   | 13  | 2           | 7.3597E-07  | 8.70129E-06 |
| TR15416-c1_g1  | 48   | 12  | 2           | 1.96144E-06 | 2.16258E-05 |
| TR27509-c0_g1  | 44   | 11  | 2           | 5.24316E-06 | 5.37316E-05 |
| TR16743-c0_g1  | 40   | 10  | 2           | 1.40653E-05 | 0.000133966 |
| TR18316-c0_g1  | 36   | 9   | 2           | 3.78919E-05 | 0.000333271 |
| TR27565-c0_g1  | 36   | 9   | 2           | 3.78919E-05 | 0.000333271 |
| TR24217-c0_g1  | 32   | 8   | 2           | 0.000102608 | 0.000810577 |
| TR24913-c0_g2  | 32   | 8   | 2           | 0.000102608 | 0.000810577 |
| TR25703-c0_g1  | 32   | 8   | 2           | 0.000102608 | 0.000810577 |
| TR4184-c0_g1   | 32   | 8   | 2           | 0.000102608 | 0.000810577 |
| TR13396-c0_g1  | 24   | 6   | 2           | 0.000768423 | 0.00486744  |
| TR1365-c0_g1   | 24   | 6   | 2           | 0.000768423 | 0.00486744  |
| TR23572-c0_g1  | 24   | 6   | 2           | 0.000768423 | 0.00486744  |



|               |      |     |             |             |             |
|---------------|------|-----|-------------|-------------|-------------|
| TR25019-c0_g1 | 24   | 6   | 2           | 0.000768423 | 0.00486744  |
| TR2636-c0_g2  | 24   | 6   | 2           | 0.000768423 | 0.00486744  |
| TR560-c0_g1   | 24   | 6   | 2           | 0.000768423 | 0.00486744  |
| TR76-c0_g1    | 24   | 6   | 2           | 0.000768423 | 0.00486744  |
| TR12740-c0_g1 | 20   | 5   | 2           | 0.002134686 | 0.011448734 |
| TR14904-c0_g1 | 20   | 5   | 2           | 0.002134686 | 0.011448734 |
| TR19025-c0_g2 | 20   | 5   | 2           | 0.002134686 | 0.011448734 |
| TR19609-c0_g1 | 20   | 5   | 2           | 0.002134686 | 0.011448734 |
| TR25233-c0_g1 | 20   | 5   | 2           | 0.002134686 | 0.011448734 |
| TR3209-c0_g1  | 20   | 5   | 2           | 0.002134686 | 0.011448734 |
| TR3439-c0_g1  | 20   | 5   | 2           | 0.002134686 | 0.011448734 |
| TR20834-c0_g1 | 63   | 16  | 1.977279923 | 6.33684E-08 | 8.7376E-07  |
| TR6075-c0_g1  | 63   | 16  | 1.977279923 | 6.33684E-08 | 8.7376E-07  |
| TR10682-c0_g2 | 55   | 14  | 1.974004791 | 4.45674E-07 | 5.47079E-06 |
| TR12128-c0_g5 | 39   | 10  | 1.963474124 | 2.27661E-05 | 0.000208429 |
| TR12269-c0_g1 | 39   | 10  | 1.963474124 | 2.27661E-05 | 0.000208429 |
| TR5938-c0_g1  | 39   | 10  | 1.963474124 | 2.27661E-05 | 0.000208429 |
| TR618-c6_g1   | 308  | 79  | 1.963005793 | 1.1375E-32  | 7.16262E-31 |
| TR11210-c0_g2 | 2237 | 575 | 1.959931395 | 1.0685E-225 | 5.3431E-223 |
| TR19449-c0_g2 | 284  | 73  | 1.959922561 | 3.4E-30     | 1.95285E-28 |
| TR25790-c0_g2 | 35   | 9   | 1.959358016 | 6.14597E-05 | 0.000510702 |
| TR26246-c0_g1 | 35   | 9   | 1.959358016 | 6.14597E-05 | 0.000510702 |
| TR3858-c1_g1  | 690  | 178 | 1.954719121 | 1.23357E-70 | 1.74769E-68 |
| TR16415-c0_g1 | 31   | 8   | 1.95419631  | 0.000166857 | 0.001254658 |
| TR16485-c0_g1 | 31   | 8   | 1.95419631  | 0.000166857 | 0.001254658 |
| TR3294-c0_g1  | 31   | 8   | 1.95419631  | 0.000166857 | 0.001254658 |
| TR381-c0_g1   | 31   | 8   | 1.95419631  | 0.000166857 | 0.001254658 |
| TR14687-c0_g2 | 58   | 15  | 1.9510904   | 2.69198E-07 | 3.41802E-06 |
| TR6632-c0_g1  | 85   | 22  | 1.949959318 | 4.8251E-10  | 8.64417E-09 |
| TR2214-c0_g1  | 27   | 7   | 1.94753258  | 0.000456224 | 0.003071373 |
| TR2218-c0_g1  | 27   | 7   | 1.94753258  | 0.000456224 | 0.003071373 |
| TR1612-c0_g1  | 50   | 13  | 1.943416472 | 1.90481E-06 | 2.10835E-05 |
| TR24205-c0_g2 | 50   | 13  | 1.943416472 | 1.90481E-06 | 2.10835E-05 |
| TR9645-c0_g2  | 276  | 72  | 1.938599455 | 5.4932E-29  | 3.02238E-27 |
| TR19834-c0_g1 | 92   | 24  | 1.938599455 | 1.1145E-10  | 2.11238E-09 |
| TR20791-c0_g2 | 69   | 18  | 1.938599455 | 2.31988E-08 | 3.39423E-07 |
| TR20834-c0_g2 | 69   | 18  | 1.938599455 | 2.31988E-08 | 3.39423E-07 |
| TR9575-c1_g1  | 46   | 12  | 1.938599455 | 5.08788E-06 | 5.22032E-05 |
| TR22230-c0_g1 | 23   | 6   | 1.938599455 | 0.001258959 | 0.007383226 |
| TR24073-c0_g1 | 23   | 6   | 1.938599455 | 0.001258959 | 0.007383226 |
| TR26630-c0_g1 | 23   | 6   | 1.938599455 | 0.001258959 | 0.007383226 |
| TR9324-c0_g1  | 23   | 6   | 1.938599455 | 0.001258959 | 0.007383226 |
| TR8568-c0_g1  | 88   | 23  | 1.935869663 | 2.92401E-10 | 5.36268E-09 |
| TR11210-c0_g1 | 2221 | 581 | 1.934599324 | 2.9962E-220 | 1.3767E-217 |

|                |      |     |             |             |             |
|----------------|------|-----|-------------|-------------|-------------|
| TR7250-c0_g1   | 61   | 16  | 1.930737338 | 1.62268E-07 | 2.12869E-06 |
| TR10483-c0_g1  | 19   | 5   | 1.925999419 | 0.003517639 | 0.017502052 |
| TR13678-c0_g1  | 19   | 5   | 1.925999419 | 0.003517639 | 0.017502052 |
| TR15668-c0_g1  | 19   | 5   | 1.925999419 | 0.003517639 | 0.017502052 |
| TR16133-c0_g1  | 19   | 5   | 1.925999419 | 0.003517639 | 0.017502052 |
| TR21402-c1_g1  | 19   | 5   | 1.925999419 | 0.003517639 | 0.017502052 |
| TR27253-c0_g2  | 19   | 5   | 1.925999419 | 0.003517639 | 0.017502052 |
| TR27787-c0_g1  | 19   | 5   | 1.925999419 | 0.003517639 | 0.017502052 |
| TR3945-c0_g1   | 19   | 5   | 1.925999419 | 0.003517639 | 0.017502052 |
| TR4121-c0_g1   | 19   | 5   | 1.925999419 | 0.003517639 | 0.017502052 |
| TR5734-c0_g1   | 19   | 5   | 1.925999419 | 0.003517639 | 0.017502052 |
| TR8474-c1_g1   | 300  | 79  | 1.925037942 | 4.40457E-31 | 2.62749E-29 |
| TR20748-c0_g1  | 102  | 27  | 1.91753784  | 1.56054E-11 | 3.22409E-10 |
| TR21238-c0_g1  | 34   | 9   | 1.91753784  | 9.92292E-05 | 0.000787963 |
| TR21971-c0_g1  | 34   | 9   | 1.91753784  | 9.92292E-05 | 0.000787963 |
| TR1679-c0_g2   | 83   | 22  | 1.915607813 | 1.21935E-09 | 2.07514E-08 |
| TR15672-c0_g1  | 64   | 17  | 1.912537159 | 9.76484E-08 | 1.31445E-06 |
| TR8487-c0_g1   | 64   | 17  | 1.912537159 | 9.76484E-08 | 1.31445E-06 |
| TR27395-c0_g2  | 79   | 21  | 1.911463325 | 3.20565E-09 | 5.18064E-08 |
| TR9359-c0_g2   | 60   | 16  | 1.906890596 | 2.58546E-07 | 3.29507E-06 |
| TR10373-c3_g5  | 206  | 55  | 1.905140814 | 1.43073E-21 | 5.56619E-20 |
| TR10132-c0_g1  | 101  | 27  | 1.903323981 | 2.46859E-11 | 5.03834E-10 |
| TR25078-c0_g2  | 41   | 11  | 1.898120386 | 2.18607E-05 | 0.000201552 |
| TR9535-c0_g1   | 108  | 29  | 1.896906507 | 5.70466E-12 | 1.24183E-10 |
| TR26906-c0_g1  | 186  | 50  | 1.895302621 | 1.67123E-19 | 5.82236E-18 |
| TR15261-c0_g1  | 26   | 7   | 1.893084796 | 0.000740075 | 0.00470189  |
| TR17635-c0_g1  | 85   | 23  | 1.88582898  | 1.16318E-09 | 1.98352E-08 |
| TR18856-c0_g1  | 576  | 156 | 1.884522783 | 1.73328E-56 | 2.00463E-54 |
| TR1962-c0_g1   | 48   | 13  | 1.884522783 | 4.86262E-06 | 5.02254E-05 |
| TR26919-c0_g1  | 107  | 29  | 1.883485991 | 8.99435E-12 | 1.91864E-10 |
| TR13321-c0_g1  | 1958 | 531 | 1.882596999 | 2.1649E-187 | 8.7634E-185 |
| TR17931-c0_g1  | 44   | 12  | 1.874469118 | 1.30035E-05 | 0.000124551 |
| TR21971-c0_g2  | 33   | 9   | 1.874469118 | 0.000159436 | 0.001205258 |
| TR10293-c0_g11 | 22   | 6   | 1.874469118 | 0.002049337 | 0.011156634 |
| TR22225-c0_g1  | 22   | 6   | 1.874469118 | 0.002049337 | 0.011156634 |
| TR25659-c0_g1  | 22   | 6   | 1.874469118 | 0.002049337 | 0.011156634 |
| TR26118-c0_g1  | 22   | 6   | 1.874469118 | 0.002049337 | 0.011156634 |
| TR3639-c0_g1   | 22   | 6   | 1.874469118 | 0.002049337 | 0.011156634 |
| TR4233-c0_g1   | 22   | 6   | 1.874469118 | 0.002049337 | 0.011156634 |
| TR7374-c0_g1   | 22   | 6   | 1.874469118 | 0.002049337 | 0.011156634 |
| TR9639-c0_g1   | 22   | 6   | 1.874469118 | 0.002049337 | 0.011156634 |
| TR9825-c0_g1   | 22   | 6   | 1.874469118 | 0.002049337 | 0.011156634 |
| TR3282-c0_g1   | 1812 | 495 | 1.872082525 | 3.0627E-172 | 1.1571E-169 |
| TR20791-c0_g1  | 62   | 17  | 1.866733469 | 2.45662E-07 | 3.13793E-06 |

|                |      |     |             |             |             |
|----------------|------|-----|-------------|-------------|-------------|
| TR16522-c0_g3  | 51   | 14  | 1.86507042  | 2.89792E-06 | 3.12221E-05 |
| TR21445-c0_g1  | 138  | 38  | 1.860596943 | 1.55901E-14 | 4.07772E-13 |
| TR22988-c0_g1  | 69   | 19  | 1.860596943 | 5.56492E-08 | 7.78692E-07 |
| TR25814-c0_g2  | 69   | 19  | 1.860596943 | 5.56492E-08 | 7.78692E-07 |
| TR20347-c0_g1  | 58   | 16  | 1.857980995 | 6.50425E-07 | 7.84261E-06 |
| TR26752-c0_g2  | 58   | 16  | 1.857980995 | 6.50425E-07 | 7.84261E-06 |
| TR8568-c0_g2   | 58   | 16  | 1.857980995 | 6.50425E-07 | 7.84261E-06 |
| TR253-c0_g1    | 29   | 8   | 1.857980995 | 0.000434416 | 0.002951899 |
| TR10682-c0_g1  | 47   | 13  | 1.854149134 | 7.7268E-06  | 7.70022E-05 |
| TR25078-c0_g1  | 47   | 13  | 1.854149134 | 7.7268E-06  | 7.70022E-05 |
| TR25286-c0_g1  | 54   | 15  | 1.847996907 | 1.72551E-06 | 1.92494E-05 |
| TR9645-c0_g1   | 93   | 26  | 1.838719093 | 3.9639E-10  | 7.17695E-09 |
| TR12117-c0_g1  | 25   | 7   | 1.836501268 | 0.001193247 | 0.007066102 |
| TR22552-c0_g2  | 25   | 7   | 1.836501268 | 0.001193247 | 0.007066102 |
| TR280-c0_g1    | 25   | 7   | 1.836501268 | 0.001193247 | 0.007066102 |
| TR19924-c0_g1  | 32   | 9   | 1.830074999 | 0.00025487  | 0.001826781 |
| TR5901-c0_g1   | 32   | 9   | 1.830074999 | 0.00025487  | 0.001826781 |
| TR6493-c0_g1   | 32   | 9   | 1.830074999 | 0.00025487  | 0.001826781 |
| TR11146-c0_g1  | 78   | 22  | 1.8259706   | 1.18955E-08 | 1.79609E-07 |
| TR10587-c0_g2  | 39   | 11  | 1.8259706   | 5.54697E-05 | 0.000464561 |
| TR16835-c0_g1  | 39   | 11  | 1.8259706   | 5.54697E-05 | 0.000464561 |
| TR26945-c0_g1  | 39   | 11  | 1.8259706   | 5.54697E-05 | 0.000464561 |
| TR24882-c0_g1  | 46   | 13  | 1.823122238 | 1.22309E-05 | 0.000117967 |
| TR6647-c0_g1   | 53   | 15  | 1.821029859 | 2.72293E-06 | 2.94488E-05 |
| TR13746-c4_g2  | 2023 | 573 | 1.819889276 | 8.0221E-185 | 3.0997E-182 |
| TR19449-c0_g1  | 127  | 36  | 1.818759685 | 4.01626E-13 | 9.50998E-12 |
| TR18898-c0_g1  | 141  | 40  | 1.817623258 | 2.15257E-14 | 5.57873E-13 |
| TR10318-c1_g17 | 133  | 38  | 1.807354922 | 1.4465E-13  | 3.54868E-12 |
| TR8158-c0_g1   | 91   | 26  | 1.807354922 | 9.69726E-10 | 1.67888E-08 |
| TR18850-c0_g1  | 84   | 24  | 1.807354922 | 4.24313E-09 | 6.76725E-08 |
| TR20355-c0_g1  | 84   | 24  | 1.807354922 | 4.24313E-09 | 6.76725E-08 |
| TR13291-c0_g1  | 77   | 22  | 1.807354922 | 1.86245E-08 | 2.751E-07   |
| TR13363-c0_g1  | 56   | 16  | 1.807354922 | 1.61553E-06 | 1.80699E-05 |
| TR24821-c0_g1  | 56   | 16  | 1.807354922 | 1.61553E-06 | 1.80699E-05 |
| TR4089-c0_g1   | 49   | 14  | 1.807354922 | 7.23706E-06 | 7.27614E-05 |
| TR6766-c0_g1   | 35   | 10  | 1.807354922 | 0.000149535 | 0.001136983 |
| TR2222-c0_g1   | 28   | 8   | 1.807354922 | 0.000695075 | 0.004437817 |
| TR6202-c0_g1   | 28   | 8   | 1.807354922 | 0.000695075 | 0.004437817 |
| TR9157-c0_g1   | 21   | 6   | 1.807354922 | 0.003312672 | 0.016608611 |
| TR8113-c0_g1   | 181  | 52  | 1.799406169 | 8.18097E-18 | 2.59491E-16 |
| TR11138-c1_g1  | 90   | 26  | 1.791413378 | 1.51181E-09 | 2.54718E-08 |
| TR26182-c0_g1  | 45   | 13  | 1.791413378 | 1.92835E-05 | 0.000179053 |
| TR11144-c0_g1  | 38   | 11  | 1.788495895 | 8.77623E-05 | 0.000704141 |
| TR18671-c0_g1  | 38   | 11  | 1.788495895 | 8.77623E-05 | 0.000704141 |

|                |      |     |             |             |             |
|----------------|------|-----|-------------|-------------|-------------|
| TR26125-c0_g1  | 38   | 11  | 1.788495895 | 8.77623E-05 | 0.000704141 |
| TR1020-c0_g1   | 31   | 9   | 1.784271309 | 0.000405239 | 0.002781431 |
| TR10519-c0_g1  | 31   | 9   | 1.784271309 | 0.000405239 | 0.002781431 |
| TR15638-c0_g1  | 31   | 9   | 1.784271309 | 0.000405239 | 0.002781431 |
| TR18310-c0_g1  | 31   | 9   | 1.784271309 | 0.000405239 | 0.002781431 |
| TR18774-c0_g1  | 31   | 9   | 1.784271309 | 0.000405239 | 0.002781431 |
| TR9527-c0_g1   | 55   | 16  | 1.781359714 | 2.5333E-06  | 2.74327E-05 |
| TR349-c0_g1    | 48   | 14  | 1.777607579 | 1.13722E-05 | 0.000110481 |
| TR21066-c0_g1  | 24   | 7   | 1.777607579 | 0.001911415 | 0.010512017 |
| TR1298-c0_g2   | 82   | 24  | 1.772589504 | 1.03043E-08 | 1.56697E-07 |
| TR21151-c0_g1  | 82   | 24  | 1.772589504 | 1.03043E-08 | 1.56697E-07 |
| TR21833-c0_g1  | 41   | 12  | 1.772589504 | 5.1533E-05  | 0.000434157 |
| TR9262-c0_g1   | 41   | 12  | 1.772589504 | 5.1533E-05  | 0.000434157 |
| TR15971-c0_g1  | 34   | 10  | 1.765534746 | 0.000236511 | 0.001729146 |
| TR9344-c0_g1   | 156  | 46  | 1.761840263 | 3.72599E-15 | 1.02669E-13 |
| TR12567-c0_g1  | 61   | 18  | 1.760812336 | 8.87075E-07 | 1.03701E-05 |
| TR17538-c0_g1  | 88   | 26  | 1.7589919   | 3.64973E-09 | 5.85933E-08 |
| TR8349-c0_g1   | 44   | 13  | 1.7589919   | 3.02769E-05 | 0.000270777 |
| TR488-c0_g1    | 179  | 53  | 1.755895323 | 4.32948E-17 | 1.32625E-15 |
| TR18471-c0_g1  | 27   | 8   | 1.754887502 | 0.001105394 | 0.006636004 |
| TR18683-c0_g1  | 27   | 8   | 1.754887502 | 0.001105394 | 0.006636004 |
| TR24637-c0_g1  | 27   | 8   | 1.754887502 | 0.001105394 | 0.006636004 |
| TR3431-c0_g1   | 27   | 8   | 1.754887502 | 0.001105394 | 0.006636004 |
| TR3988-c0_g1   | 64   | 19  | 1.752072487 | 5.25062E-07 | 6.38994E-06 |
| TR8811-c0_g1   | 64   | 19  | 1.752072487 | 5.25062E-07 | 6.38994E-06 |
| TR10318-c1_g5  | 188  | 56  | 1.74723393  | 9.30316E-18 | 2.94536E-16 |
| TR13656-c0_g1  | 94   | 28  | 1.74723393  | 1.29267E-09 | 2.18896E-08 |
| TR10360-c0_g13 | 47   | 14  | 1.74723393  | 1.77994E-05 | 0.000166913 |
| TR8068-c0_g2   | 47   | 14  | 1.74723393  | 1.77994E-05 | 0.000166913 |
| TR15935-c0_g1  | 57   | 17  | 1.745427173 | 2.33672E-06 | 2.53686E-05 |
| TR3724-c0_g2   | 77   | 23  | 1.743224585 | 4.17566E-08 | 5.91598E-07 |
| TR7996-c0_g2   | 77   | 23  | 1.743224585 | 4.17566E-08 | 5.91598E-07 |
| TR8075-c0_g1   | 294  | 88  | 1.740240726 | 9.91193E-27 | 4.89872E-25 |
| TR3724-c0_g1   | 90   | 27  | 1.736965594 | 3.359E-09   | 5.41817E-08 |
| TR15024-c0_g1  | 60   | 18  | 1.736965594 | 1.37988E-06 | 1.55362E-05 |
| TR22910-c0_g1  | 30   | 9   | 1.736965594 | 0.00064067  | 0.004128975 |
| TR9504-c3_g1   | 799  | 240 | 1.735161097 | 2.02745E-69 | 2.84871E-67 |
| TR27395-c0_g1  | 73   | 22  | 1.73039294  | 1.09028E-07 | 1.45268E-06 |
| TR15871-c0_g1  | 116  | 35  | 1.728697978 | 2.22621E-11 | 4.56007E-10 |
| TR9473-c10_g1  | 1332 | 402 | 1.728326676 | 6.969E-114  | 1.6011E-111 |
| TR8784-c0_g1   | 53   | 16  | 1.727920455 | 6.16326E-06 | 6.26696E-05 |
| TR25121-c0_g1  | 96   | 29  | 1.726981506 | 1.18706E-09 | 2.02221E-08 |
| TR23607-c0_g1  | 86   | 26  | 1.725825037 | 8.72947E-09 | 1.3431E-07  |
| TR17479-c0_g2  | 43   | 13  | 1.725825037 | 4.73329E-05 | 0.000402135 |

|               |      |     |             |             |             |
|---------------|------|-----|-------------|-------------|-------------|
| TR10318-c1_g4 | 284  | 86  | 1.723482365 | 1.51686E-25 | 7.06539E-24 |
| TR12916-c0_g1 | 33   | 10  | 1.722466024 | 0.000372084 | 0.002565258 |
| TR13718-c0_g1 | 33   | 10  | 1.722466024 | 0.000372084 | 0.002565258 |
| TR17958-c0_g1 | 33   | 10  | 1.722466024 | 0.000372084 | 0.002565258 |
| TR6501-c0_g1  | 155  | 47  | 1.721535554 | 1.2484E-14  | 3.29571E-13 |
| TR10360-c0_g5 | 122  | 37  | 1.721283972 | 7.90499E-12 | 1.70336E-10 |
| TR960-c9_g1   | 1332 | 404 | 1.721166884 | 3.1811E-113 | 7.1162E-111 |
| TR1124-c0_g1  | 23   | 7   | 1.716207034 | 0.003040506 | 0.015332054 |
| TR24394-c0_g1 | 23   | 7   | 1.716207034 | 0.003040506 | 0.015332054 |
| TR25044-c0_g2 | 23   | 7   | 1.716207034 | 0.003040506 | 0.015332054 |
| TR6491-c0_g1  | 23   | 7   | 1.716207034 | 0.003040506 | 0.015332054 |
| TR6745-c0_g2  | 23   | 7   | 1.716207034 | 0.003040506 | 0.015332054 |
| TR8167-c0_g1  | 23   | 7   | 1.716207034 | 0.003040506 | 0.015332054 |
| TR20328-c0_g1 | 108  | 33  | 1.710493383 | 1.48443E-10 | 2.77637E-09 |
| TR7734-c0_g1  | 36   | 11  | 1.710493383 | 0.000216503 | 0.001597584 |
| TR3752-c0_g1  | 85   | 26  | 1.708951218 | 1.34519E-08 | 2.01498E-07 |
| TR22003-c0_g1 | 49   | 15  | 1.707819249 | 1.6279E-05  | 0.000153187 |
| TR10891-c0_g1 | 75   | 23  | 1.705256734 | 9.96494E-08 | 1.33927E-06 |
| TR4867-c2_g1  | 91   | 28  | 1.700439718 | 4.73194E-09 | 7.4976E-08  |
| TR15025-c1_g1 | 65   | 20  | 1.700439718 | 7.44253E-07 | 8.79311E-06 |
| TR14539-c0_g1 | 39   | 12  | 1.700439718 | 0.000126191 | 0.000979639 |
| TR21125-c0_g1 | 39   | 12  | 1.700439718 | 0.000126191 | 0.000979639 |
| TR12707-c0_g2 | 26   | 8   | 1.700439718 | 0.001746598 | 0.009735893 |
| TR25119-c0_g1 | 26   | 8   | 1.700439718 | 0.001746598 | 0.009735893 |
| TR496-c2_g1   | 1953 | 601 | 1.700255053 | 2.3834E-162 | 8.6214E-160 |
| TR14997-c2_g1 | 1885 | 582 | 1.695473465 | 3.9084E-156 | 1.2778E-153 |
| TR7996-c0_g3  | 68   | 21  | 1.695145418 | 4.39326E-07 | 5.40458E-06 |
| TR8688-c0_g1  | 84   | 26  | 1.691877705 | 2.0678E-08  | 3.04638E-07 |
| TR3483-c0_g1  | 71   | 22  | 1.690315501 | 2.59459E-07 | 3.30423E-06 |
| TR18814-c0_g1 | 100  | 31  | 1.689659879 | 9.88933E-10 | 1.70826E-08 |
| TR14566-c0_g1 | 58   | 18  | 1.688055994 | 3.30533E-06 | 3.52983E-05 |
| TR1594-c0_g2  | 29   | 9   | 1.688055994 | 0.001006804 | 0.006116087 |
| TR4650-c0_g1  | 45   | 14  | 1.684498174 | 4.3064E-05  | 0.000371082 |
| TR5978-c0_g1  | 45   | 14  | 1.684498174 | 4.3064E-05  | 0.000371082 |
| TR8996-c0_g1  | 45   | 14  | 1.684498174 | 4.3064E-05  | 0.000371082 |
| TR15448-c0_g3 | 61   | 19  | 1.682809824 | 1.94574E-06 | 2.14871E-05 |
| TR5973-c0_g1  | 61   | 19  | 1.682809824 | 1.94574E-06 | 2.14871E-05 |
| TR525-c5_g1   | 443  | 138 | 1.682638432 | 1.16965E-37 | 8.53461E-36 |
| TR4104-c0_g1  | 77   | 24  | 1.68182404  | 9.06217E-08 | 1.22374E-06 |
| TR18252-c0_g1 | 80   | 25  | 1.678071905 | 5.35915E-08 | 7.52375E-07 |
| TR19857-c0_g1 | 80   | 25  | 1.678071905 | 5.35915E-08 | 7.52375E-07 |
| TR13039-c0_g1 | 32   | 10  | 1.678071905 | 0.000582093 | 0.00379316  |
| TR13833-c0_g1 | 32   | 10  | 1.678071905 | 0.000582093 | 0.00379316  |
| TR14522-c0_g1 | 32   | 10  | 1.678071905 | 0.000582093 | 0.00379316  |

|               |      |     |             |             |             |
|---------------|------|-----|-------------|-------------|-------------|
| TR17931-c0_g2 | 32   | 10  | 1.678071905 | 0.000582093 | 0.00379316  |
| TR22221-c0_g1 | 32   | 10  | 1.678071905 | 0.000582093 | 0.00379316  |
| TR6075-c0_g2  | 32   | 10  | 1.678071905 | 0.000582093 | 0.00379316  |
| TR10141-c0_g1 | 99   | 31  | 1.67516031  | 1.51321E-09 | 2.54718E-08 |
| TR27706-c0_g1 | 70   | 22  | 1.669851398 | 3.98502E-07 | 4.93449E-06 |
| TR27395-c0_g3 | 89   | 28  | 1.668378509 | 1.11098E-08 | 1.68343E-07 |
| TR12118-c0_g4 | 143  | 45  | 1.66801824  | 4.46979E-13 | 1.05107E-11 |
| TR10587-c0_g1 | 1083 | 342 | 1.662965013 | 4.8582E-88  | 9.17732E-86 |
| TR10588-c0_g1 | 38   | 12  | 1.662965013 | 0.000196028 | 0.001457252 |
| TR13668-c0_g1 | 218  | 69  | 1.659659868 | 5.20795E-19 | 1.76379E-17 |
| TR24296-c0_g1 | 82   | 26  | 1.657112286 | 4.84889E-08 | 6.82995E-07 |
| TR25121-c0_g2 | 82   | 26  | 1.657112286 | 4.84889E-08 | 6.82995E-07 |
| TR13975-c0_g1 | 41   | 13  | 1.657112286 | 0.000114113 | 0.000896525 |
| TR899-c0_g1   | 249  | 79  | 1.656221184 | 1.98311E-21 | 7.64523E-20 |
| TR4894-c0_g1  | 66   | 21  | 1.652076697 | 1.0358E-06  | 1.19877E-05 |
| TR309-c0_g1   | 44   | 14  | 1.652076697 | 6.6546E-05  | 0.000548144 |
| TR10489-c0_g1 | 22   | 7   | 1.652076697 | 0.004800413 | 0.023074179 |
| TR15262-c0_g1 | 22   | 7   | 1.652076697 | 0.004800413 | 0.023074179 |
| TR17600-c0_g1 | 22   | 7   | 1.652076697 | 0.004800413 | 0.023074179 |
| TR22333-c0_g1 | 22   | 7   | 1.652076697 | 0.004800413 | 0.023074179 |
| TR25044-c0_g1 | 22   | 7   | 1.652076697 | 0.004800413 | 0.023074179 |
| TR25211-c0_g1 | 22   | 7   | 1.652076697 | 0.004800413 | 0.023074179 |
| TR26291-c0_g1 | 22   | 7   | 1.652076697 | 0.004800413 | 0.023074179 |
| TR12589-c0_g1 | 279  | 89  | 1.648387881 | 1.14951E-23 | 4.89806E-22 |
| TR10366-c5_g5 | 47   | 15  | 1.647698256 | 3.88678E-05 | 0.000340095 |
| TR16471-c0_g1 | 47   | 15  | 1.647698256 | 3.88678E-05 | 0.000340095 |
| TR24279-c0_g1 | 75   | 24  | 1.64385619  | 2.12197E-07 | 2.74345E-06 |
| TR9318-c0_g1  | 50   | 16  | 1.64385619  | 2.27338E-05 | 0.000208429 |
| TR11340-c0_g1 | 25   | 8   | 1.64385619  | 0.00274079  | 0.014421866 |
| TR25234-c0_g1 | 25   | 8   | 1.64385619  | 0.00274079  | 0.014421866 |
| TR25475-c0_g2 | 25   | 8   | 1.64385619  | 0.00274079  | 0.014421866 |
| TR13150-c0_g1 | 28   | 9   | 1.637429921 | 0.001572135 | 0.009011588 |
| TR20372-c0_g1 | 28   | 9   | 1.637429921 | 0.001572135 | 0.009011588 |
| TR25790-c0_g1 | 28   | 9   | 1.637429921 | 0.001572135 | 0.009011588 |
| TR7996-c0_g1  | 87   | 28  | 1.635588574 | 2.58318E-08 | 3.75363E-07 |
| TR12567-c0_g2 | 59   | 19  | 1.634715536 | 4.58182E-06 | 4.74114E-05 |
| TR12567-c0_g3 | 59   | 19  | 1.634715536 | 4.58182E-06 | 4.74114E-05 |
| TR15448-c0_g1 | 59   | 19  | 1.634715536 | 4.58182E-06 | 4.74114E-05 |
| TR26371-c0_g1 | 31   | 10  | 1.632268215 | 0.000905263 | 0.005542193 |
| TR3490-c0_g1  | 31   | 10  | 1.632268215 | 0.000905263 | 0.005542193 |
| TR8068-c1_g1  | 31   | 10  | 1.632268215 | 0.000905263 | 0.005542193 |
| TR11474-c0_g2 | 34   | 11  | 1.628031223 | 0.000522959 | 0.003441212 |
| TR631-c0_g1   | 284  | 92  | 1.626185163 | 1.27043E-23 | 5.38629E-22 |
| TR10373-c3_g1 | 108  | 35  | 1.625604485 | 6.58865E-10 | 1.15719E-08 |

|                |     |     |             |             |             |
|----------------|-----|-----|-------------|-------------|-------------|
| TR13741-c0_g1  | 111 | 36  | 1.624490865 | 3.90631E-10 | 7.08022E-09 |
| TR8491-c0_g1   | 37  | 12  | 1.624490865 | 0.000302943 | 0.002143337 |
| TR581-c0_g1    | 234 | 76  | 1.622437206 | 1.1064E-19  | 3.90256E-18 |
| TR15571-c0_g1  | 40  | 13  | 1.621488377 | 0.000175911 | 0.001318082 |
| TR3758-c0_g1   | 83  | 27  | 1.620151929 | 6.64293E-08 | 9.08597E-07 |
| TR10293-c0_g6  | 86  | 28  | 1.618909833 | 3.92416E-08 | 5.59697E-07 |
| TR17541-c0_g1  | 43  | 14  | 1.618909833 | 0.000102361 | 0.00081018  |
| TR3208-c0_g1   | 43  | 14  | 1.618909833 | 0.000102361 | 0.00081018  |
| TR9202-c0_g1   | 43  | 14  | 1.618909833 | 0.000102361 | 0.00081018  |
| TR25309-c0_g1  | 46  | 15  | 1.61667136  | 5.96719E-05 | 0.000498281 |
| TR27754-c0_g1  | 46  | 15  | 1.61667136  | 5.96719E-05 | 0.000498281 |
| TR15448-c0_g2  | 58  | 19  | 1.610053482 | 6.99353E-06 | 7.03963E-05 |
| TR5887-c0_g3   | 61  | 20  | 1.608809243 | 4.10415E-06 | 4.28862E-05 |
| TR10293-c0_g15 | 140 | 46  | 1.605721061 | 3.20625E-12 | 7.11625E-11 |
| TR13379-c0_g1  | 188 | 62  | 1.600392541 | 7.91012E-16 | 2.25264E-14 |
| TR21080-c1_g1  | 103 | 34  | 1.599037686 | 2.5432E-09  | 4.15349E-08 |
| TR10299-c2_g3  | 745 | 246 | 1.59858211  | 8.27158E-58 | 9.69847E-56 |
| TR9359-c0_g1   | 115 | 38  | 1.597562538 | 3.13462E-10 | 5.71197E-09 |
| TR25382-c0_g1  | 497 | 165 | 1.590779827 | 7.07488E-39 | 5.25251E-37 |
| TR6570-c0_g1   | 108 | 36  | 1.584962501 | 1.34432E-09 | 2.27415E-08 |
| TR10562-c0_g1  | 96  | 32  | 1.584962501 | 1.09522E-08 | 1.66103E-07 |
| TR23337-c0_g1  | 66  | 22  | 1.584962501 | 2.14996E-06 | 2.3476E-05  |
| TR14787-c0_g1  | 45  | 15  | 1.584962501 | 9.11987E-05 | 0.000730334 |
| TR16599-c0_g1  | 45  | 15  | 1.584962501 | 9.11987E-05 | 0.000730334 |
| TR2745-c0_g1   | 42  | 14  | 1.584962501 | 0.0001567   | 0.001185629 |
| TR27467-c0_g1  | 42  | 14  | 1.584962501 | 0.0001567   | 0.001185629 |
| TR10588-c0_g2  | 39  | 13  | 1.584962501 | 0.000269804 | 0.001933004 |
| TR15907-c0_g1  | 36  | 12  | 1.584962501 | 0.000465645 | 0.003103462 |
| TR10830-c0_g1  | 33  | 11  | 1.584962501 | 0.00080585  | 0.00504623  |
| TR11474-c0_g1  | 33  | 11  | 1.584962501 | 0.00080585  | 0.00504623  |
| TR12962-c0_g1  | 33  | 11  | 1.584962501 | 0.00080585  | 0.00504623  |
| TR15968-c0_g1  | 33  | 11  | 1.584962501 | 0.00080585  | 0.00504623  |
| TR14724-c0_g2  | 30  | 10  | 1.584962501 | 0.001399101 | 0.008139916 |
| TR483-c0_g1    | 30  | 10  | 1.584962501 | 0.001399101 | 0.008139916 |
| TR9337-c0_g1   | 30  | 10  | 1.584962501 | 0.001399101 | 0.008139916 |
| TR10591-c0_g1  | 27  | 9   | 1.584962501 | 0.002438394 | 0.012963077 |
| TR5131-c0_g1   | 27  | 9   | 1.584962501 | 0.002438394 | 0.012963077 |
| TR7054-c0_g1   | 27  | 9   | 1.584962501 | 0.002438394 | 0.012963077 |
| TR9182-c0_g1   | 27  | 9   | 1.584962501 | 0.002438394 | 0.012963077 |
| TR1190-c0_g1   | 24  | 8   | 1.584962501 | 0.004269387 | 0.020691343 |
| TR21232-c0_g1  | 629 | 211 | 1.575817018 | 4.30113E-48 | 3.97418E-46 |
| TR15980-c1_g1  | 333 | 112 | 1.572023445 | 3.63197E-26 | 1.75921E-24 |
| TR8037-c0_g2   | 95  | 32  | 1.569855608 | 1.6484E-08  | 2.44332E-07 |
| TR10098-c0_g1  | 68  | 23  | 1.563900885 | 1.90992E-06 | 2.11263E-05 |

|                |     |     |             |             |             |
|----------------|-----|-----|-------------|-------------|-------------|
| TR2665-c0_g1   | 53  | 18  | 1.557995453 | 2.75375E-05 | 0.000248896 |
| TR12128-c0_g9  | 50  | 17  | 1.556393349 | 4.71308E-05 | 0.000401044 |
| TR27784-c0_g1  | 44  | 15  | 1.552541023 | 0.000138731 | 0.001060527 |
| TR9242-c0_g1   | 44  | 15  | 1.552541023 | 0.000138731 | 0.001060527 |
| TR15009-c0_g1  | 82  | 28  | 1.550197083 | 2.03561E-07 | 2.63379E-06 |
| TR18220-c0_g1  | 79  | 27  | 1.548893246 | 3.4522E-07  | 4.32335E-06 |
| TR18749-c0_g1  | 114 | 39  | 1.547487795 | 9.4325E-10  | 1.63638E-08 |
| TR26896-c0_g1  | 38  | 13  | 1.547487795 | 0.000411626 | 0.002819846 |
| TR12836-c0_g1  | 321 | 110 | 1.545069774 | 1.10604E-24 | 4.94848E-23 |
| TR11167-c0_g1  | 70  | 24  | 1.544320516 | 1.69084E-06 | 1.8875E-05  |
| TR17232-c0_g1  | 35  | 12  | 1.544320516 | 0.000711689 | 0.004533404 |
| TR18844-c0_g1  | 32  | 11  | 1.540568381 | 0.001234235 | 0.007278403 |
| TR25814-c0_g1  | 32  | 11  | 1.540568381 | 0.001234235 | 0.007278403 |
| TR10321-c5_g5  | 151 | 52  | 1.537965021 | 2.38588E-12 | 5.34427E-11 |
| TR13019-c0_g1  | 29  | 10  | 1.5360529   | 0.002148158 | 0.011510093 |
| TR17931-c0_g3  | 29  | 10  | 1.5360529   | 0.002148158 | 0.011510093 |
| TR24165-c0_g1  | 29  | 10  | 1.5360529   | 0.002148158 | 0.011510093 |
| TR26529-c0_g1  | 52  | 18  | 1.530514717 | 4.15826E-05 | 0.000359592 |
| TR10109-c0_g1  | 26  | 9   | 1.530514717 | 0.003754985 | 0.018493544 |
| TR17209-c0_g2  | 26  | 9   | 1.530514717 | 0.003754985 | 0.018493544 |
| TR25119-c0_g2  | 26  | 9   | 1.530514717 | 0.003754985 | 0.018493544 |
| TR11116-c0_g1  | 75  | 26  | 1.528378972 | 8.78497E-07 | 1.02862E-05 |
| TR1347-c0_g1   | 49  | 17  | 1.527247003 | 7.12219E-05 | 0.000584216 |
| TR3261-c0_g1   | 46  | 16  | 1.523561956 | 0.000122188 | 0.000952043 |
| TR1858-c0_g1   | 66  | 23  | 1.520832163 | 4.31618E-06 | 4.48538E-05 |
| TR2580-c0_g1   | 63  | 22  | 1.517848305 | 7.35048E-06 | 7.38145E-05 |
| TR10321-c4_g11 | 123 | 43  | 1.516249751 | 3.85912E-10 | 7.00214E-09 |
| TR21998-c0_g1  | 80  | 28  | 1.514573173 | 4.56017E-07 | 5.58969E-06 |
| TR26434-c0_g1  | 60  | 21  | 1.514573173 | 1.25306E-05 | 0.00012036  |
| TR10373-c3_g6  | 277 | 97  | 1.513829324 | 6.40281E-21 | 2.41366E-19 |
| TR10318-c1_g2  | 208 | 73  | 1.510615159 | 4.75118E-16 | 1.37844E-14 |
| TR11823-c0_g1  | 187 | 66  | 1.502500341 | 1.77674E-14 | 4.62588E-13 |
| TR24044-c0_g1  | 34  | 12  | 1.502500341 | 0.001081311 | 0.006505208 |
| TR19958-c0_g1  | 48  | 17  | 1.497499659 | 0.000107145 | 0.000844511 |
| TR10830-c0_g2  | 31  | 11  | 1.494764692 | 0.001878293 | 0.010374743 |
| TR23091-c0_g1  | 31  | 11  | 1.494764692 | 0.001878293 | 0.010374743 |
| TR26233-c0_g3  | 31  | 11  | 1.494764692 | 0.001878293 | 0.010374743 |
| TR6177-c0_g1   | 183 | 65  | 1.493332025 | 4.40256E-14 | 1.11882E-12 |
| TR11134-c0_g1  | 121 | 43  | 1.492598483 | 8.48615E-10 | 1.48127E-08 |
| TR9586-c0_g2   | 45  | 16  | 1.491853096 | 0.000183922 | 0.001372058 |
| TR11232-c0_g1  | 42  | 15  | 1.485426827 | 0.000316322 | 0.002230565 |
| TR11892-c0_g1  | 28  | 10  | 1.485426827 | 0.003275405 | 0.016441165 |
| TR17232-c0_g2  | 28  | 10  | 1.485426827 | 0.003275405 | 0.016441165 |
| TR23976-c0_g1  | 28  | 10  | 1.485426827 | 0.003275405 | 0.016441165 |



|               |     |    |             |             |             |
|---------------|-----|----|-------------|-------------|-------------|
| TR7054-c0_g2  | 28  | 10 | 1.485426827 | 0.003275405 | 0.016441165 |
| TR10293-c0_g4 | 162 | 58 | 1.481869008 | 1.65385E-12 | 3.74903E-11 |
| TR4682-c0_g1  | 50  | 18 | 1.473931188 | 9.36012E-05 | 0.000748868 |
| TR16200-c0_g1 | 36  | 13 | 1.469485283 | 0.000942129 | 0.005738959 |
| TR25212-c0_g1 | 36  | 13 | 1.469485283 | 0.000942129 | 0.005738959 |
| TR2665-c0_g2  | 47  | 17 | 1.46712601  | 0.000160441 | 0.001210164 |
| TR13189-c0_g1 | 80  | 29 | 1.4639471   | 8.82491E-07 | 1.03259E-05 |
| TR22296-c0_g1 | 55  | 20 | 1.459431619 | 4.76889E-05 | 0.00040478  |
| TR11255-c0_g1 | 44  | 16 | 1.459431619 | 0.000275486 | 0.001963787 |
| TR25575-c0_g1 | 44  | 16 | 1.459431619 | 0.000275486 | 0.001963787 |
| TR1270-c0_g2  | 33  | 12 | 1.459431619 | 0.001632725 | 0.009206795 |
| TR19772-c0_g1 | 33  | 12 | 1.459431619 | 0.001632725 | 0.009206795 |
| TR26740-c0_g1 | 33  | 12 | 1.459431619 | 0.001632725 | 0.009206795 |
| TR15963-c0_g1 | 52  | 19 | 1.452512205 | 8.15043E-05 | 0.000659848 |
| TR14634-c0_g1 | 41  | 15 | 1.450661409 | 0.000473951 | 0.003151266 |
| TR323-c0_g1   | 41  | 15 | 1.450661409 | 0.000473951 | 0.003151266 |
| TR12688-c0_g1 | 30  | 11 | 1.447458977 | 0.002839259 | 0.014784427 |
| TR15962-c0_g1 | 30  | 11 | 1.447458977 | 0.002839259 | 0.014784427 |
| TR18238-c0_g1 | 30  | 11 | 1.447458977 | 0.002839259 | 0.014784427 |
| TR18409-c0_g1 | 30  | 11 | 1.447458977 | 0.002839259 | 0.014784427 |
| TR26914-c0_g1 | 30  | 11 | 1.447458977 | 0.002839259 | 0.014784427 |
| TR27792-c0_g1 | 30  | 11 | 1.447458977 | 0.002839259 | 0.014784427 |
| TR7310-c0_g1  | 30  | 11 | 1.447458977 | 0.002839259 | 0.014784427 |
| TR1601-c0_g1  | 38  | 14 | 1.440572591 | 0.000817208 | 0.005109828 |
| TR8529-c0_g1  | 38  | 14 | 1.440572591 | 0.000817208 | 0.005109828 |
| TR19701-c0_g1 | 65  | 24 | 1.437405312 | 1.24235E-05 | 0.000119398 |
| TR2055-c0_g2  | 73  | 27 | 1.434937057 | 3.74449E-06 | 3.94431E-05 |
| TR16209-c0_g1 | 27  | 10 | 1.432959407 | 0.004957615 | 0.023749229 |
| TR27481-c1_g1 | 27  | 10 | 1.432959407 | 0.004957615 | 0.023749229 |
| TR2793-c0_g1  | 27  | 10 | 1.432959407 | 0.004957615 | 0.023749229 |
| TR4210-c0_g1  | 27  | 10 | 1.432959407 | 0.004957615 | 0.023749229 |
| TR547-c0_g1   | 143 | 53 | 1.431950882 | 1.02488E-10 | 1.95779E-09 |
| TR7125-c0_g1  | 70  | 26 | 1.428843299 | 6.35205E-06 | 6.45121E-05 |
| TR18016-c0_g1 | 35  | 13 | 1.428843299 | 0.00141268  | 0.008210635 |
| TR1601-c0_g2  | 43  | 16 | 1.426264755 | 0.000410532 | 0.002815487 |
| TR24339-c0_g1 | 51  | 19 | 1.424497829 | 0.000120926 | 0.000942641 |
| TR11723-c0_g2 | 59  | 22 | 1.423211431 | 3.59735E-05 | 0.000317713 |
| TR15930-c0_g1 | 59  | 22 | 1.423211431 | 3.59735E-05 | 0.000317713 |
| TR13821-c0_g1 | 225 | 84 | 1.421463768 | 7.50175E-16 | 2.13993E-14 |
| TR8134-c0_g1  | 211 | 79 | 1.417318441 | 6.71786E-15 | 1.82157E-13 |
| TR26353-c0_g1 | 56  | 21 | 1.415037499 | 6.13012E-05 | 0.000510133 |
| TR4203-c0_g1  | 56  | 21 | 1.415037499 | 6.13012E-05 | 0.000510133 |
| TR10591-c0_g2 | 32  | 12 | 1.415037499 | 0.002449324 | 0.013000856 |
| TR17891-c0_g1 | 32  | 12 | 1.415037499 | 0.002449324 | 0.013000856 |

|               |      |     |             |             |             |
|---------------|------|-----|-------------|-------------|-------------|
| TR2602-c0_g1  | 32   | 12  | 1.415037499 | 0.002449324 | 0.013000856 |
| TR4110-c0_g1  | 32   | 12  | 1.415037499 | 0.002449324 | 0.013000856 |
| TR7395-c0_g1  | 32   | 12  | 1.415037499 | 0.002449324 | 0.013000856 |
| TR11823-c0_g2 | 93   | 35  | 1.409875794 | 2.60013E-07 | 3.30881E-06 |
| TR5642-c0_g1  | 53   | 20  | 1.40599236  | 0.000104572 | 0.000824996 |
| TR1231-c0_g1  | 45   | 17  | 1.404390255 | 0.00035454  | 0.00247136  |
| TR13307-c0_g1 | 37   | 14  | 1.402098444 | 0.001217733 | 0.007198123 |
| TR16559-c0_g1 | 37   | 14  | 1.402098444 | 0.001217733 | 0.007198123 |
| TR7578-c0_g1  | 37   | 14  | 1.402098444 | 0.001217733 | 0.007198123 |
| TR277-c0_g1   | 66   | 25  | 1.40053793  | 1.58477E-05 | 0.000149436 |
| TR4027-c0_g1  | 153  | 58  | 1.399406848 | 5.08505E-11 | 9.99453E-10 |
| TR10481-c0_g1 | 58   | 22  | 1.398549376 | 5.29842E-05 | 0.00044572  |
| TR2559-c0_g1  | 29   | 11  | 1.398549376 | 0.004261552 | 0.020665151 |
| TR5601-c0_g1  | 29   | 11  | 1.398549376 | 0.004261552 | 0.020665151 |
| TR15999-c0_g1 | 50   | 19  | 1.395928676 | 0.000178596 | 0.001332908 |
| TR17698-c0_g1 | 42   | 16  | 1.392317423 | 0.000608545 | 0.003949748 |
| TR10869-c0_g1 | 118  | 45  | 1.390789953 | 9.4189E-09  | 1.44395E-07 |
| TR3794-c0_g1  | 55   | 21  | 1.389042291 | 9.02348E-05 | 0.000723638 |
| TR7523-c0_g1  | 123  | 47  | 1.387925654 | 4.85917E-09 | 7.69202E-08 |
| TR24339-c0_g2 | 47   | 18  | 1.38466385  | 0.000305412 | 0.002155419 |
| TR13628-c0_g1 | 219  | 84  | 1.382469637 | 6.96322E-15 | 1.8821E-13  |
| TR7125-c0_g2  | 73   | 28  | 1.382469637 | 6.97631E-06 | 7.02645E-05 |
| TR15923-c1_g1 | 44   | 17  | 1.371968777 | 0.000523023 | 0.003441212 |
| TR921-c0_g1   | 44   | 17  | 1.371968777 | 0.000523023 | 0.003441212 |
| TR11723-c0_g1 | 62   | 24  | 1.36923381  | 3.93666E-05 | 0.000344105 |
| TR25894-c0_g1 | 62   | 24  | 1.36923381  | 3.93666E-05 | 0.000344105 |
| TR14531-c0_g1 | 31   | 12  | 1.36923381  | 0.003649302 | 0.017999121 |
| TR14981-c0_g1 | 31   | 12  | 1.36923381  | 0.003649302 | 0.017999121 |
| TR18257-c0_g1 | 31   | 12  | 1.36923381  | 0.003649302 | 0.017999121 |
| TR23634-c0_g1 | 31   | 12  | 1.36923381  | 0.003649302 | 0.017999121 |
| TR27763-c0_g1 | 31   | 12  | 1.36923381  | 0.003649302 | 0.017999121 |
| TR2612-c0_g1  | 80   | 31  | 1.367731785 | 3.07067E-06 | 3.29788E-05 |
| TR18863-c0_g1 | 149  | 58  | 1.361187525 | 2.2325E-10  | 4.11664E-09 |
| TR26888-c0_g1 | 1911 | 744 | 1.360953252 | 1.8264E-114 | 4.2537E-112 |
| TR22938-c0_g1 | 554  | 216 | 1.358854664 | 2.43329E-34 | 1.64163E-32 |
| TR13336-c0_g1 | 223  | 87  | 1.357956404 | 9.36653E-15 | 2.48818E-13 |
| TR1347-c0_g2  | 46   | 18  | 1.353636955 | 0.000448568 | 0.003046843 |
| TR20335-c0_g1 | 212  | 83  | 1.352881023 | 4.99601E-14 | 1.26397E-12 |
| TR13684-c0_g1 | 240  | 94  | 1.352301744 | 1.13369E-15 | 3.18583E-14 |
| TR313-c0_g1   | 51   | 20  | 1.350497247 | 0.000225246 | 0.001649926 |
| TR10293-c0_g2 | 698  | 274 | 1.349051143 | 2.30602E-42 | 1.84931E-40 |
| TR1298-c0_g1  | 33   | 13  | 1.343954401 | 0.003115819 | 0.015681776 |
| TR21295-c0_g1 | 33   | 13  | 1.343954401 | 0.003115819 | 0.015681776 |
| TR7771-c0_g1  | 38   | 15  | 1.341036918 | 0.001541529 | 0.008848086 |

|                |     |     |             |             |             |
|----------------|-----|-----|-------------|-------------|-------------|
| TR15923-c1_g2  | 43  | 17  | 1.338801913 | 0.000767464 | 0.00486744  |
| TR14783-c0_g1  | 58  | 23  | 1.334419039 | 9.72863E-05 | 0.00077398  |
| TR13814-c2_g15 | 247 | 98  | 1.333657387 | 9.00019E-16 | 2.55451E-14 |
| TR361-c0_g1    | 78  | 31  | 1.331205908 | 6.45081E-06 | 6.54369E-05 |
| TR18512-c0_g1  | 113 | 45  | 1.328325866 | 5.94288E-08 | 8.26139E-07 |
| TR24091-c0_g1  | 50  | 20  | 1.321928095 | 0.000328258 | 0.002301372 |
| TR25442-c0_g1  | 45  | 18  | 1.321928095 | 0.000655418 | 0.004198559 |
| TR15493-c0_g1  | 40  | 16  | 1.321928095 | 0.00131499  | 0.007685312 |
| TR24251-c0_g1  | 35  | 14  | 1.321928095 | 0.002654181 | 0.014013849 |
| TR13695-c0_g1  | 77  | 31  | 1.31259023  | 9.30431E-06 | 9.15426E-05 |
| TR10318-c1_g1  | 62  | 25  | 1.310340121 | 7.12078E-05 | 0.000584216 |
| TR4703-c0_g1   | 57  | 23  | 1.309328058 | 0.000141033 | 0.001077153 |
| TR23196-c0_g1  | 52  | 21  | 1.308122295 | 0.000280225 | 0.001996728 |
| TR11777-c0_g1  | 47  | 19  | 1.306661338 | 0.00055892  | 0.003661801 |
| TR25516-c0_g1  | 42  | 17  | 1.304854582 | 0.001119929 | 0.006716145 |
| TR13448-c0_g1  | 74  | 30  | 1.30256277  | 1.56494E-05 | 0.000147647 |
| TR13428-c0_g1  | 32  | 13  | 1.299560282 | 0.004580418 | 0.022116774 |
| TR1497-c0_g2   | 86  | 35  | 1.296981738 | 3.4726E-06  | 3.69454E-05 |
| TR10091-c0_g1  | 76  | 31  | 1.293731203 | 1.33752E-05 | 0.000127967 |
| TR22015-c0_g1  | 66  | 27  | 1.289506617 | 5.19153E-05 | 0.000437162 |
| TR11172-c0_g1  | 61  | 25  | 1.286881148 | 0.000102649 | 0.000810577 |
| TR2055-c0_g1   | 102 | 42  | 1.280107919 | 5.67673E-07 | 6.88879E-06 |
| TR10293-c0_g5  | 97  | 40  | 1.277984747 | 1.10847E-06 | 1.27766E-05 |
| TR11887-c0_g1  | 41  | 17  | 1.270089163 | 0.001624909 | 0.009180994 |
| TR15215-c0_g1  | 53  | 22  | 1.268488836 | 0.000344313 | 0.002405002 |
| TR15480-c0_g1  | 53  | 22  | 1.268488836 | 0.000344313 | 0.002405002 |
| TR13814-c2_g11 | 130 | 54  | 1.267480311 | 2.11088E-08 | 3.10717E-07 |
| TR22906-c0_g1  | 60  | 25  | 1.263034406 | 0.000147356 | 0.001121421 |
| TR7805-c0_g1   | 36  | 15  | 1.263034406 | 0.00328287  | 0.016473768 |
| TR11160-c1_g1  | 247 | 103 | 1.261866704 | 1.40398E-14 | 3.68927E-13 |
| TR21703-c0_g1  | 175 | 73  | 1.261386553 | 9.43762E-11 | 1.80689E-09 |
| TR4209-c0_g1   | 194 | 81  | 1.260062839 | 9.58852E-12 | 2.03772E-10 |
| TR3906-c0_g1   | 55  | 23  | 1.257797757 | 0.00029247  | 0.002070098 |
| TR10318-c1_g10 | 153 | 64  | 1.257387843 | 1.54485E-09 | 2.58764E-08 |
| TR15022-c0_g1  | 251 | 105 | 1.257298036 | 1.02846E-14 | 2.72354E-13 |
| TR7546-c0_g1   | 43  | 18  | 1.256339753 | 0.001376651 | 0.00802912  |
| TR19810-c0_g1  | 148 | 62  | 1.255257055 | 2.99155E-09 | 4.86237E-08 |
| TR3900-c0_g1   | 186 | 78  | 1.253756592 | 3.05399E-11 | 6.17383E-10 |
| TR12128-c0_g17 | 50  | 21  | 1.251538767 | 0.000582571 | 0.003793365 |
| TR14630-c0_g1  | 50  | 21  | 1.251538767 | 0.000582571 | 0.003793365 |
| TR3795-c0_g1   | 69  | 29  | 1.250543462 | 5.38873E-05 | 0.00045287  |
| TR14373-c0_g1  | 38  | 16  | 1.247927513 | 0.002774804 | 0.014567361 |

|               |      |     |             |             |             |
|---------------|------|-----|-------------|-------------|-------------|
| TR20682-c0_g1 | 140  | 59  | 1.246639968 | 9.58929E-09 | 1.46874E-07 |
| TR21589-c1_g1 | 500  | 211 | 1.244685096 | 2.42635E-27 | 1.24626E-25 |
| TR20775-c0_g2 | 187  | 79  | 1.243113712 | 3.67634E-11 | 7.35325E-10 |
| TR8508-c3_g1  | 1517 | 641 | 1.242824824 | 2.63425E-79 | 4.14682E-77 |
| TR26739-c0_g1 | 111  | 47  | 1.239827015 | 3.6437E-07  | 4.55833E-06 |
| TR1497-c0_g1  | 59   | 25  | 1.23878686  | 0.00021063  | 0.001557629 |
| TR17543-c0_g1 | 245  | 104 | 1.236198221 | 4.70082E-14 | 1.19106E-12 |
| TR18416-c0_g1 | 40   | 17  | 1.234465254 | 0.002343584 | 0.012494207 |
| TR19727-c0_g1 | 68   | 29  | 1.229481846 | 7.66667E-05 | 0.000621868 |
| TR13692-c0_g1 | 180  | 77  | 1.225066556 | 1.40018E-10 | 2.62748E-09 |
| TR3968-c0_g1  | 264  | 113 | 1.224215157 | 8.09819E-15 | 2.17504E-13 |
| TR18893-c0_g1 | 63   | 27  | 1.222392421 | 0.000151392 | 0.00115007  |
| TR16162-c0_g1 | 49   | 21  | 1.222392421 | 0.000833691 | 0.005210973 |
| TR10499-c0_g1 | 42   | 18  | 1.222392421 | 0.001978199 | 0.010859539 |
| TR7594-c0_g1  | 42   | 18  | 1.222392421 | 0.001978199 | 0.010859539 |
| TR3838-c0_g1  | 35   | 15  | 1.222392421 | 0.00474369  | 0.022853219 |
| TR10318-c1_g7 | 51   | 22  | 1.212993723 | 0.00070464  | 0.004493552 |
| TR15880-c0_g1 | 51   | 22  | 1.212993723 | 0.00070464  | 0.004493552 |
| TR5594-c0_g1  | 51   | 22  | 1.212993723 | 0.00070464  | 0.004493552 |
| TR6178-c0_g1  | 88   | 38  | 1.211504105 | 8.75696E-06 | 8.62572E-05 |
| TR15431-c0_g1 | 44   | 19  | 1.211504105 | 0.001669002 | 0.009349955 |
| TR14756-c0_g1 | 37   | 16  | 1.209453366 | 0.003992626 | 0.019388724 |
| TR6207-c1_g1  | 351  | 152 | 1.207399707 | 8.29445E-19 | 2.77592E-17 |
| TR11289-c1_g1 | 600  | 260 | 1.206450877 | 5.64979E-31 | 3.35853E-29 |
| TR15477-c0_g1 | 180  | 78  | 1.206450877 | 2.33861E-10 | 4.30763E-09 |
| TR14802-c0_g1 | 90   | 39  | 1.206450877 | 7.4327E-06  | 7.45521E-05 |
| TR14633-c0_g1 | 60   | 26  | 1.206450877 | 0.000253614 | 0.001820084 |
| TR4885-c0_g1  | 76   | 33  | 1.203533394 | 3.96348E-05 | 0.000345916 |
| TR6766-c0_g2  | 76   | 33  | 1.203533394 | 3.96348E-05 | 0.000345916 |
| TR18192-c0_g1 | 115  | 50  | 1.201633861 | 4.44352E-07 | 5.45851E-06 |
| TR26739-c1_g4 | 115  | 50  | 1.201633861 | 4.44352E-07 | 5.45851E-06 |
| TR11158-c1_g1 | 430  | 187 | 1.20129839  | 1.6307E-22  | 6.64848E-21 |
| TR15275-c1_g1 | 85   | 37  | 1.199937571 | 1.45327E-05 | 0.000138262 |
| TR13807-c2_g1 | 572  | 249 | 1.199869405 | 2.32281E-29 | 1.29904E-27 |
| TR342-c0_g1   | 39   | 17  | 1.197939378 | 0.003359277 | 0.016837311 |
| TR25894-c0_g2 | 71   | 31  | 1.195550809 | 7.78897E-05 | 0.000631186 |
| TR4885-c0_g2  | 73   | 32  | 1.189824559 | 6.59259E-05 | 0.000544884 |
| TR16137-c0_g1 | 41   | 18  | 1.187627003 | 0.002825697 | 0.014747006 |
| TR958-c0_g1   | 50   | 22  | 1.184424571 | 0.001000478 | 0.006083497 |
| TR14588-c0_g1 | 84   | 37  | 1.182864057 | 2.04098E-05 | 0.000188994 |
| TR6524-c2_g1  | 120  | 53  | 1.178970141 | 3.80225E-07 | 4.72884E-06 |
| TR13809-c0_g1 | 242  | 107 | 1.177396251 | 5.81421E-13 | 1.35596E-11 |
| TR10015-c0_g1 | 52   | 23  | 1.176877762 | 0.00084324  | 0.005268725 |
| TR14468-c0_g1 | 97   | 43  | 1.173648087 | 5.38437E-06 | 5.49469E-05 |

|               |      |      |             |             |             |
|---------------|------|------|-------------|-------------|-------------|
| TR6100-c0_g2  | 97   | 43   | 1.173648087 | 5.38437E-06 | 5.49469E-05 |
| TR6427-c0_g1  | 266  | 118  | 1.172639386 | 5.11763E-14 | 1.29281E-12 |
| TR593-c2_g1   | 286  | 127  | 1.17118665  | 6.23908E-15 | 1.69716E-13 |
| TR18147-c0_g1 | 54   | 24   | 1.169925001 | 0.00071063  | 0.004528353 |
| TR22030-c0_g1 | 45   | 20   | 1.169925001 | 0.001998478 | 0.010921494 |
| TR20324-c0_g1 | 247  | 110  | 1.167007518 | 4.95324E-13 | 1.15994E-11 |
| TR21402-c0_g2 | 47   | 21   | 1.162271429 | 0.001680518 | 0.009398366 |
| TR18254-c0_g1 | 38   | 17   | 1.160464672 | 0.004784337 | 0.023042511 |
| TR2070-c0_g1  | 96   | 43   | 1.158697746 | 7.50937E-06 | 7.52767E-05 |
| TR21589-c1_g2 | 569  | 255  | 1.157931405 | 1.14295E-27 | 6.01602E-26 |
| TR25280-c0_g1 | 87   | 39   | 1.157541277 | 2.04321E-05 | 0.000189098 |
| TR2070-c0_g2  | 58   | 26   | 1.157541277 | 0.000504581 | 0.003344463 |
| TR6100-c0_g1  | 58   | 26   | 1.157541277 | 0.000504581 | 0.003344463 |
| TR24883-c0_g1 | 524  | 235  | 1.156906055 | 1.41948E-25 | 6.62994E-24 |
| TR25928-c0_g2 | 69   | 31   | 1.154328146 | 0.000153543 | 0.001164854 |
| TR3412-c0_g1  | 405  | 182  | 1.153983458 | 4.723E-20   | 1.69762E-18 |
| TR4829-c0_g2  | 60   | 27   | 1.152003093 | 0.000425157 | 0.002900575 |
| TR950-c0_g1   | 71   | 32   | 1.14974712  | 0.000129564 | 0.001002921 |
| TR10136-c0_g1 | 144  | 65   | 1.147557188 | 5.25904E-08 | 7.39541E-07 |
| TR10559-c0_g1 | 42   | 19   | 1.144389909 | 0.00336374  | 0.016849746 |
| TR18790-c0_g1 | 42   | 19   | 1.144389909 | 0.00336374  | 0.016849746 |
| TR516-c1_g1   | 130  | 59   | 1.139724764 | 2.71748E-07 | 3.44525E-06 |
| TR8500-c1_g1  | 2812 | 1277 | 1.138838069 | 1.2678E-126 | 3.1237E-124 |
| TR15443-c0_g1 | 77   | 35   | 1.137503524 | 7.78372E-05 | 0.000631062 |
| TR3299-c0_g1  | 46   | 21   | 1.131244533 | 0.002366346 | 0.012607652 |
| TR529-c0_g1   | 179  | 82   | 1.126263773 | 2.29461E-09 | 3.77287E-08 |
| TR26368-c0_g1 | 85   | 39   | 1.123988717 | 3.94589E-05 | 0.000344735 |
| TR3893-c0_g1  | 50   | 23   | 1.120294234 | 0.001665895 | 0.009342828 |
| TR4091-c0_g1  | 50   | 23   | 1.120294234 | 0.001665895 | 0.009342828 |
| TR14474-c0_g1 | 252  | 116  | 1.119298928 | 1.73614E-12 | 3.93032E-11 |
| TR11137-c0_g1 | 89   | 41   | 1.118181426 | 2.80983E-05 | 0.000252355 |
| TR26278-c0_g1 | 115  | 53   | 1.117569596 | 1.94633E-06 | 2.14871E-05 |
| TR8526-c4_g1  | 295  | 136  | 1.117108303 | 2.53226E-14 | 6.55278E-13 |
| TR8065-c1_g1  | 117  | 54   | 1.115477217 | 1.64531E-06 | 1.83787E-05 |
| TR13810-c3_g2 | 52   | 24   | 1.115477217 | 0.001398164 | 0.008139916 |
| TR14882-c0_g1 | 52   | 24   | 1.115477217 | 0.001398164 | 0.008139916 |
| TR4039-c0_g1  | 212  | 98   | 1.11321061  | 1.18686E-10 | 2.23953E-09 |
| TR9522-c0_g1  | 54   | 25   | 1.111031312 | 0.001173693 | 0.006962435 |
| TR3242-c0_g1  | 41   | 19   | 1.109624491 | 0.004731848 | 0.022809107 |
| TR9464-c0_g1  | 41   | 19   | 1.109624491 | 0.004731848 | 0.022809107 |
| TR8688-c0_g2  | 226  | 105  | 1.105933445 | 3.72932E-11 | 7.45046E-10 |
| TR18171-c0_g1 | 43   | 20   | 1.10433666  | 0.003958635 | 0.019376588 |
| TR12918-c1_g1 | 60   | 28   | 1.099535674 | 0.000695117 | 0.004437817 |
| TR14544-c0_g1 | 77   | 36   | 1.096861539 | 0.0001259   | 0.000978278 |

|                |      |      |             |             |             |
|----------------|------|------|-------------|-------------|-------------|
| TR21688-c0_g1  | 62   | 29   | 1.096215315 | 0.000583975 | 0.00380105  |
| TR26938-c0_g1  | 47   | 22   | 1.095157233 | 0.002773658 | 0.014567361 |
| TR4829-c0_g1   | 79   | 37   | 1.094327383 | 0.000106014 | 0.000835985 |
| TR9524-c1_g1   | 2825 | 1324 | 1.093347745 | 4.4891E-119 | 1.0749E-116 |
| TR6495-c0_g1   | 64   | 30   | 1.093109404 | 0.000490696 | 0.003256235 |
| TR10299-c2_g2  | 1104 | 518  | 1.091716169 | 1.84599E-47 | 1.69644E-45 |
| TR27174-c1_g1  | 49   | 23   | 1.091147888 | 0.002322927 | 0.012387968 |
| TR21725-c0_g2  | 85   | 40   | 1.087462841 | 6.33381E-05 | 0.000525284 |
| TR8470-c0_g1   | 51   | 24   | 1.087462841 | 0.001946095 | 0.010693664 |
| TR20356-c0_g1  | 53   | 25   | 1.084064265 | 0.001630921 | 0.009205779 |
| TR12609-c0_g1  | 178  | 84   | 1.083416008 | 7.88533E-09 | 1.21763E-07 |
| TR21586-c0_g3  | 55   | 26   | 1.080919995 | 0.001367214 | 0.007985037 |
| TR14891-c2_g1  | 1120 | 532  | 1.074000581 | 6.99416E-47 | 6.25842E-45 |
| TR11123-c0_g1  | 80   | 38   | 1.074000581 | 0.000122713 | 0.00095526  |
| TR10360-c0_g12 | 141  | 67   | 1.073462162 | 3.45332E-07 | 4.32335E-06 |
| TR25850-c0_g2  | 61   | 29   | 1.072756342 | 0.000806872 | 0.005050772 |
| TR13725-c0_g1  | 84   | 40   | 1.070389328 | 8.69163E-05 | 0.000698342 |
| TR24338-c0_g1  | 84   | 40   | 1.070389328 | 8.69163E-05 | 0.000698342 |
| TR13421-c0_g1  | 69   | 33   | 1.064130337 | 0.000400884 | 0.00275822  |
| TR16170-c0_g1  | 71   | 34   | 1.062284278 | 0.000336765 | 0.002355186 |
| TR14145-c0_g1  | 50   | 24   | 1.058893689 | 0.002694322 | 0.014216957 |
| TR20348-c0_g1  | 52   | 25   | 1.056583528 | 0.002254571 | 0.012030978 |
| TR21586-c0_g2  | 54   | 26   | 1.054447784 | 0.001887373 | 0.010421513 |
| TR9369-c0_g1   | 58   | 28   | 1.050626073 | 0.001324173 | 0.007736324 |
| TR12598-c0_g1  | 120  | 58   | 1.0489096   | 3.98658E-06 | 4.1709E-05  |
| TR19797-c0_g1  | 120  | 58   | 1.0489096   | 3.98658E-06 | 4.1709E-05  |
| TR25626-c0_g3  | 60   | 29   | 1.0489096   | 0.00110974  | 0.006657389 |
| TR836-c0_g1    | 216  | 105  | 1.040641984 | 7.88391E-10 | 1.37756E-08 |
| TR12128-c0_g14 | 72   | 35   | 1.040641984 | 0.000386975 | 0.002664675 |
| TR20302-c0_g1  | 1129 | 549  | 1.040167432 | 7.04843E-45 | 6.02174E-43 |
| TR7752-c0_g1   | 80   | 39   | 1.036525876 | 0.000192712 | 0.001433853 |
| TR9534-c0_g1   | 209  | 102  | 1.03493379  | 1.75532E-09 | 2.91149E-08 |
| TR449-c0_g1    | 86   | 42   | 1.033947332 | 0.000114499 | 0.000898725 |
| TR16697-c0_g1  | 98   | 48   | 1.029747343 | 4.06167E-05 | 0.000351419 |
| TR13121-c0_g1  | 49   | 24   | 1.029747343 | 0.003709766 | 0.01828673  |
| TR21749-c0_g1  | 49   | 24   | 1.029747343 | 0.003709766 | 0.01828673  |
| TR3985-c0_g1   | 118  | 58   | 1.024662054 | 7.30385E-06 | 7.33895E-05 |
| TR9429-c0_g1   | 61   | 30   | 1.023846742 | 0.001272332 | 0.00745908  |
| TR21258-c0_g2  | 132  | 65   | 1.022026306 | 2.21235E-06 | 2.41263E-05 |
| TR10066-c0_g1  | 233  | 115  | 1.018696094 | 3.57976E-10 | 6.50916E-09 |
| TR19963-c0_g1  | 150  | 75   | 1           | 7.2874E-07  | 8.62181E-06 |
| TR21258-c0_g1  | 128  | 64   | 1           | 4.74343E-06 | 4.90538E-05 |
| TR16384-c0_g1  | 116  | 58   | 1           | 1.32445E-05 | 0.000126787 |

|               |      |      |              |             |             |
|---------------|------|------|--------------|-------------|-------------|
| TR25850-c0_g1 | 66   | 33   | 1            | 0.0010175   | 0.006153983 |
| TR25203-c0_g1 | 58   | 29   | 1            | 0.002069535 | 0.011259148 |
| TR7590-c0_g1  | 58   | 29   | 1            | 0.002069535 | 0.011259148 |
| TR25928-c0_g1 | 56   | 28   | 1            | 0.002474081 | 0.013111797 |
| TR12128-c0_g6 | 52   | 26   | 1            | 0.003541017 | 0.017608065 |
| TR12596-c3_g1 | 101  | 202  | -1           | 2.39556E-09 | 3.92367E-08 |
| TR484-c0_g1   | 48   | 96   | -1           | 3.88422E-05 | 0.000340095 |
| TR23194-c0_g1 | 41   | 82   | -1           | 0.000143293 | 0.001092289 |
| TR710-c0_g1   | 30   | 60   | -1           | 0.001143791 | 0.006789793 |
| TR13721-c0_g1 | 386  | 774  | -1.003732719 | 9.80163E-32 | 5.99427E-30 |
| TR856-c0_g1   | 92   | 185  | -1.007819504 | 9.04415E-09 | 1.389E-07   |
| TR460-c5_g1   | 154  | 310  | -1.009337865 | 9.33837E-14 | 2.33135E-12 |
| TR515-c2_g1   | 117  | 236  | -1.01227833  | 7.25946E-11 | 1.39458E-09 |
| TR2562-c3_g1  | 195  | 394  | -1.014721506 | 3.30121E-17 | 1.02231E-15 |
| TR2820-c0_g1  | 45   | 91   | -1.015941544 | 4.96794E-05 | 0.000421044 |
| TR1663-c0_g1  | 32   | 65   | -1.022367813 | 0.000568313 | 0.003717611 |
| TR21017-c0_g1 | 31   | 63   | -1.023083613 | 0.000686847 | 0.004391619 |
| TR13635-c1_g1 | 111  | 226  | -1.025763096 | 1.16414E-10 | 2.20155E-09 |
| TR21979-c0_g1 | 308  | 628  | -1.027834208 | 5.21331E-27 | 2.61455E-25 |
| TR3233-c1_g1  | 329  | 672  | -1.030373649 | 6.78219E-29 | 3.70759E-27 |
| TR531-c1_g1   | 244  | 499  | -1.032158668 | 6.28844E-22 | 2.49212E-20 |
| TR24479-c0_g1 | 22   | 45   | -1.032421478 | 0.003851035 | 0.018950126 |
| TR11269-c2_g1 | 322  | 661  | -1.037589583 | 9.4546E-29  | 5.13548E-27 |
| TR3223-c1_g1  | 158  | 325  | -1.04051516  | 5.40633E-15 | 1.48011E-13 |
| TR20334-c0_g1 | 162  | 334  | -1.04385429  | 1.94193E-15 | 5.41748E-14 |
| TR6726-c1_g2  | 64   | 132  | -1.044394119 | 5.84865E-07 | 7.09235E-06 |
| TR2820-c0_g2  | 48   | 99   | -1.044394119 | 1.51355E-05 | 0.000143192 |
| TR1001-c0_g1  | 77   | 159  | -1.046096415 | 4.00547E-08 | 5.70361E-07 |
| TR11272-c3_g1 | 197  | 407  | -1.046833165 | 1.48506E-18 | 4.88276E-17 |
| TR9360-c0_g2  | 44   | 91   | -1.048363022 | 3.17118E-05 | 0.000283312 |
| TR6726-c1_g1  | 58   | 120  | -1.0489096   | 1.75211E-06 | 1.95332E-05 |
| TR5188-c0_g1  | 28   | 58   | -1.050626073 | 0.000876422 | 0.005371424 |
| TR15859-c1_g1 | 108  | 224  | -1.05246742  | 5.79302E-11 | 1.12946E-09 |
| TR7803-c0_g1  | 26   | 54   | -1.054447784 | 0.001281899 | 0.007512572 |
| TR153-c0_g1   | 128  | 266  | -1.055282436 | 8.5504E-13  | 1.96976E-11 |
| TR3989-c1_g1  | 163  | 339  | -1.056413309 | 6.41018E-16 | 1.84402E-14 |
| TR8653-c0_g2  | 85   | 177  | -1.058214614 | 5.01228E-09 | 7.91229E-08 |
| TR8467-c0_g1  | 282  | 588  | -1.060120992 | 1.33974E-26 | 6.58304E-25 |
| TR23919-c0_g1 | 35   | 73   | -1.060541542 | 0.000169103 | 0.001269869 |
| TR11281-c0_g1 | 58   | 121  | -1.060882242 | 1.27417E-06 | 1.44418E-05 |
| TR25318-c0_g1 | 44   | 92   | -1.064130337 | 2.29731E-05 | 0.000210212 |
| TR11159-c0_g1 | 22   | 46   | -1.064130337 | 0.002756185 | 0.01449839  |
| TR523-c1_g1   | 692  | 1448 | -1.065217659 | 1.63066E-63 | 2.06891E-61 |
| TR851-c7_g1   | 1527 | 3204 | -1.069174086 | 2.5881E-139 | 7.3336E-137 |

|               |      |      |              |             |             |
|---------------|------|------|--------------|-------------|-------------|
| TR14638-c0_g1 | 20   | 42   | -1.070389328 | 0.004053274 | 0.019672004 |
| TR27084-c0_g1 | 20   | 42   | -1.070389328 | 0.004053274 | 0.019672004 |
| TR15279-c0_g1 | 29   | 61   | -1.072756342 | 0.000521002 | 0.003434557 |
| TR9366-c0_g1  | 29   | 61   | -1.072756342 | 0.000521002 | 0.003434557 |
| TR15969-c0_g1 | 19   | 40   | -1.074000581 | 0.004919496 | 0.023593771 |
| TR10100-c1_g1 | 244  | 514  | -1.074887212 | 6.08502E-24 | 2.65265E-22 |
| TR14606-c0_g1 | 28   | 59   | -1.075288127 | 0.000629036 | 0.004058612 |
| TR2429-c0_g1  | 37   | 78   | -1.075948853 | 8.39389E-05 | 0.000677622 |
| TR13285-c0_g1 | 26   | 55   | -1.080919995 | 0.000917748 | 0.005616608 |
| TR802-c0_g1   | 110  | 233  | -1.082826431 | 8.34293E-12 | 1.78866E-10 |
| TR24965-c0_g2 | 25   | 53   | -1.084064265 | 0.001109038 | 0.00665553  |
| TR3583-c0_g2  | 102  | 217  | -1.08912589  | 3.49197E-11 | 7.00095E-10 |
| TR20308-c4_g1 | 145  | 309  | -1.091553938 | 2.39356E-15 | 6.66019E-14 |
| TR3583-c0_g1  | 99   | 211  | -1.091742569 | 5.97392E-11 | 1.1634E-09  |
| TR153-c0_g2   | 105  | 224  | -1.093109404 | 1.48119E-11 | 3.071E-10   |
| TR18778-c3_g1 | 566  | 1211 | -1.097324907 | 6.75014E-56 | 7.7021E-54  |
| TR8653-c0_g1  | 85   | 182  | -1.098403704 | 1.01306E-09 | 1.74502E-08 |
| TR27634-c0_g1 | 77   | 165  | -1.099535674 | 5.89154E-09 | 9.23171E-08 |
| TR4056-c0_g1  | 21   | 45   | -1.099535674 | 0.002372996 | 0.012639118 |
| TR19746-c0_g1 | 57   | 123  | -1.109624491 | 4.16724E-07 | 5.1414E-06  |
| TR10058-c1_g1 | 106  | 229  | -1.111283334 | 4.69838E-12 | 1.03202E-10 |
| TR597-c8_g1   | 165  | 357  | -1.11345805  | 5.27871E-18 | 1.6933E-16  |
| TR856-c0_g2   | 84   | 182  | -1.115477217 | 6.31525E-10 | 1.11032E-08 |
| TR18185-c0_g1 | 30   | 65   | -1.115477217 | 0.000220395 | 0.001622963 |
| TR8123-c0_g1  | 24   | 52   | -1.115477217 | 0.00095194  | 0.005794572 |
| TR20344-c0_g1 | 100  | 217  | -1.117695043 | 1.3664E-11  | 2.84341E-10 |
| TR27501-c0_g2 | 64   | 139  | -1.118941073 | 6.09485E-08 | 8.45881E-07 |
| TR19925-c0_g1 | 60   | 131  | -1.126532406 | 1.25068E-07 | 1.6586E-06  |
| TR24965-c0_g1 | 21   | 46   | -1.131244533 | 0.001675259 | 0.00937512  |
| TR9360-c0_g1  | 36   | 79   | -1.133855747 | 3.69524E-05 | 0.000326019 |
| TR18848-c0_g1 | 231  | 507  | -1.134092896 | 1.3731E-25  | 6.44875E-24 |
| TR15926-c4_g1 | 158  | 347  | -1.135011104 | 4.92698E-18 | 1.58646E-16 |
| TR3873-c0_g1  | 343  | 754  | -1.136355947 | 2.31688E-37 | 1.68333E-35 |
| TR25519-c0_g1 | 50   | 110  | -1.137503524 | 1.05654E-06 | 1.22194E-05 |
| TR10518-c0_g1 | 54   | 119  | -1.139930261 | 3.6745E-07  | 4.59348E-06 |
| TR4012-c0_g1  | 353  | 778  | -1.140101972 | 1.09309E-38 | 8.04503E-37 |
| TR8549-c5_g1  | 143  | 316  | -1.143909411 | 9.56057E-17 | 2.87177E-15 |
| TR15478-c0_g1 | 57   | 126  | -1.144389909 | 1.53245E-07 | 2.02594E-06 |
| TR7581-c0_g1  | 33   | 73   | -1.14543044  | 6.39418E-05 | 0.000530032 |
| TR26986-c0_g1 | 73   | 162  | -1.150025444 | 2.30807E-09 | 3.79133E-08 |
| TR13660-c0_g1 | 224  | 501  | -1.161311871 | 3.338E-26   | 1.63076E-24 |
| TR10025-c6_g1 | 2444 | 5474 | -1.16335115  | 1.1304E-270 | 7.6873E-268 |
| TR6752-c1_g1  | 25   | 56   | -1.163498732 | 0.000393116 | 0.002705869 |
| TR13764-c1_g1 | 203  | 455  | -1.164386818 | 4.87891E-24 | 2.13234E-22 |



|               |      |      |              |             |             |
|---------------|------|------|--------------|-------------|-------------|
| TR25853-c0_g1 | 41   | 92   | -1.166009951 | 5.33667E-06 | 5.45911E-05 |
| TR15452-c0_g1 | 94   | 211  | -1.166510337 | 5.38386E-12 | 1.175E-10   |
| TR15719-c0_g1 | 68   | 153  | -1.169925001 | 3.98881E-09 | 6.3856E-08  |
| TR10037-c0_g1 | 24   | 54   | -1.169925001 | 0.000472625 | 0.003144911 |
| TR25115-c0_g1 | 16   | 36   | -1.169925001 | 0.004313343 | 0.020886512 |
| TR11288-c3_g1 | 103  | 232  | -1.171480468 | 4.04032E-13 | 9.55365E-12 |
| TR7766-c1_g1  | 102  | 230  | -1.173064709 | 4.81263E-13 | 1.12968E-11 |
| TR26351-c0_g1 | 23   | 52   | -1.176877762 | 0.000568175 | 0.003717611 |
| TR17465-c0_g3 | 19   | 43   | -1.178337241 | 0.001706967 | 0.009524354 |
| TR7758-c8_g1  | 2418 | 5490 | -1.182991905 | 1.3806E-278 | 9.7797E-276 |
| TR22943-c1_g1 | 103  | 234  | -1.183864192 | 2.051E-13   | 4.97428E-12 |
| TR2777-c0_g1  | 22   | 50   | -1.184424571 | 0.000682974 | 0.004370138 |
| TR26993-c0_g1 | 54   | 123  | -1.187627003 | 9.37901E-08 | 1.26552E-06 |
| TR7536-c0_g1  | 28   | 64   | -1.192645078 | 0.000111875 | 0.000880569 |
| TR491-c0_g1   | 38   | 87   | -1.195015982 | 6.44306E-06 | 6.53974E-05 |
| TR13770-c0_g1 | 55   | 126  | -1.19592021  | 5.5598E-08  | 7.78692E-07 |
| TR10987-c0_g2 | 17   | 39   | -1.197939378 | 0.002477054 | 0.013123464 |
| TR10710-c0_g1 | 145  | 333  | -1.199469277 | 8.53619E-19 | 2.85121E-17 |
| TR8509-c0_g1  | 20   | 46   | -1.201633861 | 0.000986365 | 0.005999826 |
| TR3221-c0_g1  | 16   | 37   | -1.209453366 | 0.00298309  | 0.015332054 |
| TR502-c3_g1   | 127  | 294  | -1.210987658 | 5.29472E-17 | 1.61321E-15 |
| TR3108-c0_g1  | 22   | 51   | -1.212993723 | 0.000475439 | 0.003159928 |
| TR25839-c0_g2 | 72   | 168  | -1.222392421 | 1.76714E-10 | 3.28706E-09 |
| TR9193-c0_g1  | 30   | 70   | -1.222392421 | 3.81751E-05 | 0.000335448 |
| TR2777-c0_g4  | 21   | 49   | -1.222392421 | 0.00056992  | 0.003726692 |
| TR22796-c0_g1 | 18   | 42   | -1.222392421 | 0.001423036 | 0.008265629 |
| TR12701-c0_g1 | 15   | 35   | -1.222392421 | 0.003591344 | 0.017762134 |
| TR17448-c0_g1 | 35   | 82   | -1.228268988 | 7.68168E-06 | 7.66914E-05 |
| TR2403-c0_g1  | 67   | 157  | -1.228531558 | 5.9486E-10  | 1.0502E-08  |
| TR25260-c0_g1 | 34   | 80   | -1.234465254 | 9.15783E-06 | 9.01536E-05 |
| TR3881-c0_g1  | 28   | 66   | -1.237039197 | 5.44201E-05 | 0.000457121 |
| TR26722-c0_g1 | 14   | 33   | -1.237039197 | 0.004321623 | 0.020920648 |
| TR6511-c0_g1  | 235  | 556  | -1.242424126 | 6.56745E-32 | 4.03088E-30 |
| TR12879-c3_g1 | 134  | 318  | -1.246793765 | 4.93717E-19 | 1.67877E-17 |
| TR12701-c0_g2 | 16   | 38   | -1.247927513 | 0.00204938  | 0.011156634 |
| TR8569-c0_g1  | 140  | 334  | -1.254421276 | 4.38544E-20 | 1.57962E-18 |
| TR11195-c0_g1 | 31   | 74   | -1.255257055 | 1.5481E-05  | 0.00014614  |
| TR8511-c0_g1  | 36   | 86   | -1.256339753 | 3.13002E-06 | 3.3595E-05  |
| TR11850-c4_g1 | 41   | 98   | -1.257157839 | 6.38269E-07 | 7.71794E-06 |
| TR25685-c0_g1 | 30   | 72   | -1.263034406 | 1.84249E-05 | 0.000172588 |
| TR22318-c0_g2 | 15   | 36   | -1.263034406 | 0.002456905 | 0.013024831 |
| TR10570-c0_g1 | 22   | 53   | -1.268488836 | 0.000226966 | 0.001661811 |
| TR2032-c0_g1  | 17   | 41   | -1.270089163 | 0.00117076  | 0.006947458 |
| TR7661-c0_g1  | 24   | 58   | -1.273018494 | 0.000109966 | 0.000865941 |

|               |     |      |              |             |             |
|---------------|-----|------|--------------|-------------|-------------|
| TR27305-c0_g1 | 19  | 46   | -1.275634443 | 0.000561367 | 0.003675003 |
| TR2653-c0_g1  | 21  | 51   | -1.280107919 | 0.00027052  | 0.001937322 |
| TR6452-c0_g1  | 170 | 414  | -1.284096021 | 2.39358E-25 | 1.09392E-23 |
| TR27571-c0_g1 | 16  | 39   | -1.285402219 | 0.001398932 | 0.008139916 |
| TR14962-c0_g1 | 18  | 44   | -1.289506617 | 0.000669522 | 0.004285675 |
| TR2777-c1_g1  | 18  | 44   | -1.289506617 | 0.000669522 | 0.004285675 |
| TR8154-c0_g1  | 44  | 108  | -1.295455884 | 8.87122E-08 | 1.19891E-06 |
| TR5876-c0_g1  | 22  | 54   | -1.295455884 | 0.000155691 | 0.001179044 |
| TR17936-c1_g1 | 48  | 118  | -1.297680549 | 2.16946E-08 | 3.18787E-07 |
| TR17590-c0_g1 | 13  | 32   | -1.299560282 | 0.003520349 | 0.017510414 |
| TR10507-c0_g1 | 15  | 37   | -1.30256277  | 0.001669662 | 0.009349955 |
| TR19056-c0_g1 | 15  | 37   | -1.30256277  | 0.001669662 | 0.009349955 |
| TR5498-c0_g2  | 15  | 37   | -1.30256277  | 0.001669662 | 0.009349955 |
| TR25444-c0_g1 | 17  | 42   | -1.304854582 | 0.000797652 | 0.005005959 |
| TR2653-c0_g2  | 21  | 52   | -1.308122295 | 0.000185    | 0.00137949  |
| TR20138-c0_g2 | 25  | 62   | -1.310340121 | 4.35803E-05 | 0.000375341 |
| TR8067-c0_g1  | 27  | 67   | -1.311201688 | 2.12449E-05 | 0.00019598  |
| TR10052-c0_g1 | 170 | 422  | -1.311708253 | 1.33522E-26 | 6.57984E-25 |
| TR17459-c0_g1 | 33  | 82   | -1.313157885 | 2.49382E-06 | 2.70224E-05 |
| TR17587-c0_g1 | 35  | 87   | -1.313660479 | 1.22539E-06 | 1.39353E-05 |
| TR26937-c5_g1 | 524 | 1308 | -1.319723824 | 1.39094E-79 | 2.21007E-77 |
| TR26416-c0_g1 | 54  | 135  | -1.321928095 | 1.26043E-09 | 2.13863E-08 |
| TR6483-c0_g1  | 44  | 110  | -1.321928095 | 4.22284E-08 | 5.97784E-07 |
| TR14586-c0_g1 | 36  | 90   | -1.321928095 | 7.1244E-07  | 8.46431E-06 |
| TR8111-c0_g1  | 36  | 90   | -1.321928095 | 7.1244E-07  | 8.46431E-06 |
| TR12422-c0_g1 | 18  | 45   | -1.321928095 | 0.000455393 | 0.003071373 |
| TR17993-c0_g2 | 18  | 45   | -1.321928095 | 0.000455393 | 0.003071373 |
| TR20153-c0_g1 | 18  | 45   | -1.321928095 | 0.000455393 | 0.003071373 |
| TR6151-c0_g2  | 14  | 35   | -1.321928095 | 0.001989951 | 0.010888033 |
| TR7526-c1_g1  | 213 | 533  | -1.323282103 | 1.38553E-33 | 9.05995E-32 |
| TR15864-c0_g1 | 85  | 213  | -1.325318684 | 2.12898E-14 | 5.52602E-13 |
| TR13773-c3_g1 | 495 | 1245 | -1.330645312 | 9.19174E-77 | 1.43368E-74 |
| TR11214-c0_g1 | 161 | 405  | -1.33086122  | 3.98108E-26 | 1.91197E-24 |
| TR10070-c0_g1 | 25  | 63   | -1.333423734 | 2.97604E-05 | 0.000266298 |
| TR27497-c0_g1 | 213 | 539  | -1.339431843 | 1.53519E-34 | 1.0482E-32  |
| TR20153-c0_g2 | 15  | 38   | -1.341036918 | 0.001127448 | 0.006756472 |
| TR6485-c0_g1  | 15  | 38   | -1.341036918 | 0.001127448 | 0.006756472 |
| TR25549-c0_g1 | 22  | 56   | -1.347923303 | 7.22614E-05 | 0.000591497 |
| TR12686-c0_g1 | 20  | 51   | -1.350497247 | 0.000148941 | 0.001132973 |
| TR851-c0_g1   | 190 | 485  | -1.351985329 | 1.15005E-31 | 7.00804E-30 |
| TR17577-c0_g1 | 38  | 97   | -1.351985329 | 1.64794E-07 | 2.15849E-06 |
| TR461-c0_g1   | 18  | 46   | -1.353636955 | 0.000308095 | 0.002173455 |
| TR3086-c0_g1  | 25  | 64   | -1.35614381  | 2.02428E-05 | 0.000187652 |
| TR27084-c0_g2 | 16  | 41   | -1.357552005 | 0.000640071 | 0.004126682 |

|               |     |      |              |             |             |
|---------------|-----|------|--------------|-------------|-------------|
| TR8287-c2_g3  | 110 | 282  | -1.358191639 | 3.30646E-19 | 1.13335E-17 |
| TR21311-c2_g1 | 184 | 473  | -1.362134417 | 2.96904E-31 | 1.78999E-29 |
| TR25083-c0_g1 | 268 | 689  | -1.362270982 | 9.28397E-45 | 7.89199E-43 |
| TR20363-c0_g1 | 33  | 85   | -1.364996817 | 7.97238E-07 | 9.393E-06   |
| TR4717-c0_g1  | 19  | 49   | -1.366782331 | 0.000175902 | 0.001318082 |
| TR19567-c0_g1 | 31  | 80   | -1.367731785 | 1.61992E-06 | 1.81071E-05 |
| TR1149-c0_g1  | 72  | 186  | -1.36923381  | 2.49629E-13 | 6.03701E-12 |
| TR5498-c0_g1  | 17  | 44   | -1.371968777 | 0.00036403  | 0.002532324 |
| TR7552-c0_g1  | 17  | 44   | -1.371968777 | 0.00036403  | 0.002532324 |
| TR1445-c0_g2  | 378 | 979  | -1.372922625 | 1.40846E-63 | 1.80043E-61 |
| TR3913-c4_g1  | 22  | 57   | -1.373458396 | 4.89058E-05 | 0.000414902 |
| TR3977-c0_g1  | 25  | 65   | -1.378511623 | 1.3716E-05  | 0.000131153 |
| TR451-c4_g1   | 143 | 372  | -1.379287474 | 2.26469E-25 | 1.03781E-23 |
| TR1445-c0_g1  | 404 | 1051 | -1.379335471 | 1.38043E-68 | 1.89267E-66 |
| TR18158-c0_g1 | 56  | 146  | -1.382469637 | 6.52363E-11 | 1.26322E-09 |
| TR15914-c0_g1 | 26  | 68   | -1.387023123 | 7.89256E-06 | 7.86081E-05 |
| TR13052-c0_g1 | 21  | 55   | -1.389042291 | 5.75385E-05 | 0.000481176 |
| TR2777-c0_g3  | 21  | 55   | -1.389042291 | 5.75385E-05 | 0.000481176 |
| TR15948-c7_g1 | 128 | 336  | -1.392317423 | 2.24312E-23 | 9.43959E-22 |
| TR3981-c0_g1  | 78  | 205  | -1.394077881 | 6.81595E-15 | 1.84523E-13 |
| TR22000-c0_g1 | 19  | 50   | -1.395928676 | 0.000118294 | 0.000925098 |
| TR17524-c0_g1 | 22  | 58   | -1.398549376 | 3.2959E-05  | 0.000293375 |
| TR10018-c2_g1 | 166 | 438  | -1.399747628 | 3.34529E-30 | 1.92794E-28 |
| TR25685-c0_g2 | 35  | 93   | -1.409875794 | 1.22798E-07 | 1.63231E-06 |
| TR8057-c0_g1  | 38  | 101  | -1.410283969 | 3.52183E-08 | 5.0528E-07  |
| TR15854-c0_g1 | 18  | 48   | -1.415037499 | 0.000138876 | 0.001061158 |
| TR7543-c0_g1  | 184 | 492  | -1.418952549 | 2.2492E-34  | 1.52348E-32 |
| TR25083-c0_g2 | 340 | 912  | -1.423499078 | 1.57188E-62 | 1.965E-60   |
| TR4134-c1_g1  | 171 | 459  | -1.424497829 | 2.33598E-32 | 1.44418E-30 |
| TR24927-c0_g1 | 16  | 43   | -1.426264755 | 0.000286263 | 0.002027853 |
| TR4082-c1_g1  | 374 | 1006 | -1.42752013  | 4.51784E-69 | 6.29584E-67 |
| TR11388-c0_g1 | 13  | 35   | -1.428843299 | 0.001049161 | 0.00632298  |
| TR15476-c2_g1 | 139 | 375  | -1.431805713 | 6.26745E-27 | 3.12478E-25 |
| TR10085-c1_g1 | 10  | 27   | -1.432959407 | 0.003922394 | 0.019251121 |
| TR5202-c0_g1  | 10  | 27   | -1.432959407 | 0.003922394 | 0.019251121 |
| TR18972-c1_g1 | 71  | 192  | -1.435215381 | 1.34832E-14 | 3.55398E-13 |
| TR3822-c0_g1  | 17  | 46   | -1.436099115 | 0.000162636 | 0.001226177 |
| TR2798-c0_g1  | 100 | 271  | -1.438292852 | 4.99133E-20 | 1.78276E-18 |
| TR9513-c2_g1  | 108 | 293  | -1.439869352 | 1.47394E-21 | 5.72123E-20 |
| TR8854-c0_g2  | 32  | 87   | -1.442943496 | 1.94729E-07 | 2.52336E-06 |
| TR19910-c0_g1 | 54  | 147  | -1.444784843 | 1.2748E-11  | 2.67571E-10 |
| TR957-c0_g1   | 22  | 60   | -1.447458977 | 1.47871E-05 | 0.000140526 |
| TR19056-c0_g2 | 11  | 30   | -1.447458977 | 0.002191132 | 0.01171083  |
| TR26392-c0_g1 | 15  | 41   | -1.450661409 | 0.000334937 | 0.002344329 |

|               |      |      |              |             |             |
|---------------|------|------|--------------|-------------|-------------|
| TR554-c2_g1   | 264  | 722  | -1.451460908 | 2.85958E-51 | 2.82655E-49 |
| TR16036-c1_g1 | 184  | 504  | -1.453717967 | 2.175E-36   | 1.56686E-34 |
| TR8196-c2_g2  | 109  | 299  | -1.455817349 | 2.67064E-22 | 1.07086E-20 |
| TR19773-c0_g1 | 16   | 44   | -1.459431619 | 0.000189912 | 0.001413639 |
| TR22894-c0_g1 | 16   | 44   | -1.459431619 | 0.000189912 | 0.001413639 |
| TR9148-c0_g1  | 16   | 44   | -1.459431619 | 0.000189912 | 0.001413639 |
| TR3163-c0_g1  | 12   | 33   | -1.459431619 | 0.001229055 | 0.007252883 |
| TR934-c1_g1   | 274  | 754  | -1.46038863  | 6.22364E-54 | 6.53149E-52 |
| TR24294-c0_g1 | 361  | 998  | -1.467040978 | 2.84718E-71 | 4.10219E-69 |
| TR23635-c0_g1 | 70   | 194  | -1.470629825 | 3.24236E-15 | 8.96333E-14 |
| TR26941-c2_g1 | 245  | 680  | -1.472752997 | 2.13896E-49 | 2.0662E-47  |
| TR8148-c0_g1  | 27   | 75   | -1.473931188 | 9.19859E-07 | 1.07336E-05 |
| TR27643-c0_g1 | 18   | 50   | -1.473931188 | 6.14024E-05 | 0.000510702 |
| TR11850-c3_g1 | 73   | 203  | -1.475511358 | 6.39408E-16 | 1.84251E-14 |
| TR15873-c5_g1 | 2824 | 7861 | -1.476972761 | 0           | 0           |
| TR5153-c0_g2  | 89   | 248  | -1.478462879 | 3.69341E-19 | 1.26344E-17 |
| TR16472-c0_g1 | 33   | 92   | -1.479167837 | 5.0347E-08  | 7.08581E-07 |
| TR11859-c0_g1 | 40   | 112  | -1.485426827 | 1.6193E-09  | 2.70701E-08 |
| TR11850-c2_g1 | 25   | 70   | -1.485426827 | 1.8549E-06  | 2.05578E-05 |
| TR450-c5_g1   | 25   | 70   | -1.485426827 | 1.8549E-06  | 2.05578E-05 |
| TR12105-c1_g2 | 20   | 56   | -1.485426827 | 1.99763E-05 | 0.000185283 |
| TR21849-c0_g1 | 10   | 28   | -1.485426827 | 0.00256237  | 0.013550132 |
| TR22497-c0_g1 | 10   | 28   | -1.485426827 | 0.00256237  | 0.013550132 |
| TR9341-c0_g1  | 10   | 28   | -1.485426827 | 0.00256237  | 0.013550132 |
| TR9302-c0_g1  | 27   | 76   | -1.493040011 | 6.12066E-07 | 7.41164E-06 |
| TR12107-c0_g1 | 11   | 31   | -1.494764692 | 0.001433231 | 0.008319161 |
| TR13068-c0_g1 | 11   | 31   | -1.494764692 | 0.001433231 | 0.008319161 |
| TR16480-c0_g1 | 17   | 48   | -1.497499659 | 7.12344E-05 | 0.000584216 |
| TR1052-c0_g1  | 18   | 51   | -1.502500341 | 4.05499E-05 | 0.00035102  |
| TR20351-c0_g1 | 27   | 77   | -1.511899039 | 4.06015E-07 | 5.01292E-06 |
| TR13700-c0_g1 | 217  | 622  | -1.519219538 | 2.39151E-47 | 2.17427E-45 |
| TR4660-c0_g1  | 15   | 43   | -1.519374159 | 0.000145074 | 0.001104546 |
| TR11267-c3_g2 | 40   | 115  | -1.523561956 | 4.78641E-10 | 8.58389E-09 |
| TR7791-c0_g1  | 25   | 72   | -1.526068812 | 8.13575E-07 | 9.57884E-06 |
| TR18583-c0_g1 | 9    | 26   | -1.530514717 | 0.002978146 | 0.015332054 |
| TR25602-c0_g2 | 9    | 26   | -1.530514717 | 0.002978146 | 0.015332054 |
| TR4003-c3_g1  | 2714 | 7844 | -1.531168815 | 0           | 0           |
| TR93-c0_g2    | 10   | 29   | -1.5360529   | 0.001661714 | 0.009342828 |
| TR8465-c0_g1  | 25   | 73   | -1.545968369 | 5.36235E-07 | 6.52125E-06 |
| TR12274-c2_g1 | 101  | 295  | -1.546359661 | 6.76792E-24 | 2.93942E-22 |
| TR6452-c1_g1  | 90   | 263  | -1.547065893 | 1.72115E-21 | 6.65043E-20 |
| TR11798-c0_g2 | 16   | 47   | -1.554588852 | 5.38246E-05 | 0.000452567 |
| TR14100-c0_g1 | 17   | 50   | -1.556393349 | 3.06292E-05 | 0.000273784 |
| TR5139-c1_g2  | 71   | 209  | -1.557612013 | 1.48296E-17 | 4.66032E-16 |

|               |     |      |              |             |             |
|---------------|-----|------|--------------|-------------|-------------|
| TR12593-c8_g1 | 143 | 421  | -1.557805086 | 9.74088E-34 | 6.41891E-32 |
| TR12805-c3_g1 | 356 | 1049 | -1.559065532 | 1.4909E-81  | 2.50964E-79 |
| TR15601-c6_g1 | 85  | 252  | -1.567888987 | 4.99582E-21 | 1.90438E-19 |
| TR568-c0_g1   | 45  | 134  | -1.574236094 | 5.95175E-12 | 1.29396E-10 |
| TR21504-c2_g1 | 45  | 135  | -1.584962501 | 3.92042E-12 | 8.63373E-11 |
| TR3798-c0_g1  | 39  | 117  | -1.584962501 | 1.04185E-10 | 1.98797E-09 |
| TR21990-c0_g1 | 36  | 108  | -1.584962501 | 5.39161E-10 | 9.54839E-09 |
| TR548-c0_g1   | 22  | 66   | -1.584962501 | 1.22014E-06 | 1.38849E-05 |
| TR17572-c0_g1 | 12  | 36   | -1.584962501 | 0.000338843 | 0.002368745 |
| TR1213-c0_g1  | 10  | 30   | -1.584962501 | 0.00107021  | 0.006442982 |
| TR1663-c0_g2  | 10  | 30   | -1.584962501 | 0.00107021  | 0.006442982 |
| TR20375-c0_g1 | 10  | 30   | -1.584962501 | 0.00107021  | 0.006442982 |
| TR11645-c0_g1 | 9   | 27   | -1.584962501 | 0.00191242  | 0.010512017 |
| TR17139-c0_g1 | 9   | 27   | -1.584962501 | 0.00191242  | 0.010512017 |
| TR2509-c0_g1  | 9   | 27   | -1.584962501 | 0.00191242  | 0.010512017 |
| TR27762-c0_g2 | 9   | 27   | -1.584962501 | 0.00191242  | 0.010512017 |
| TR9088-c0_g1  | 9   | 27   | -1.584962501 | 0.00191242  | 0.010512017 |
| TR12107-c0_g2 | 8   | 24   | -1.584962501 | 0.003433402 | 0.01717845  |
| TR18074-c1_g1 | 8   | 24   | -1.584962501 | 0.003433402 | 0.01717845  |
| TR3196-c0_g1  | 8   | 24   | -1.584962501 | 0.003433402 | 0.01717845  |
| TR562-c0_g1   | 8   | 24   | -1.584962501 | 0.003433402 | 0.01717845  |
| TR3982-c1_g1  | 81  | 244  | -1.590887335 | 8.31948E-21 | 3.10862E-19 |
| TR11169-c0_g1 | 32  | 97   | -1.599912842 | 3.17843E-09 | 5.14256E-08 |
| TR13256-c2_g1 | 627 | 1901 | -1.600221184 | 8.4355E-152 | 2.6075E-149 |
| TR16035-c0_g1 | 23  | 70   | -1.605721061 | 4.56537E-07 | 5.59202E-06 |
| TR3210-c0_g1  | 39  | 119  | -1.609415544 | 4.48446E-11 | 8.88598E-10 |
| TR19756-c0_g1 | 12  | 37   | -1.624490865 | 0.000217987 | 0.001607835 |
| TR16725-c0_g1 | 11  | 34   | -1.628031223 | 0.000385814 | 0.002657756 |
| TR1775-c0_g2  | 616 | 1906 | -1.629545863 | 4.1607E-156 | 1.3347E-153 |
| TR621-c5_g1   | 344 | 1066 | -1.631726968 | 2.87848E-88 | 5.49864E-86 |
| TR14386-c0_g1 | 10  | 31   | -1.632268215 | 0.000684764 | 0.004379946 |
| TR22538-c0_g1 | 107 | 332  | -1.633572445 | 1.00013E-28 | 5.41516E-27 |
| TR851-c6_g1   | 328 | 1019 | -1.635386332 | 1.02191E-84 | 1.79112E-82 |
| TR1104-c0_g1  | 9   | 28   | -1.637429921 | 0.001219352 | 0.007198123 |
| TR13784-c0_g1 | 9   | 28   | -1.637429921 | 0.001219352 | 0.007198123 |
| TR18277-c0_g1 | 9   | 28   | -1.637429921 | 0.001219352 | 0.007198123 |
| TR25876-c0_g1 | 9   | 28   | -1.637429921 | 0.001219352 | 0.007198123 |
| TR93-c0_g1    | 9   | 28   | -1.637429921 | 0.001219352 | 0.007198123 |
| TR1453-c0_g1  | 35  | 109  | -1.638901308 | 1.70617E-10 | 3.17713E-09 |
| TR25061-c0_g1 | 17  | 53   | -1.640457613 | 8.36367E-06 | 8.29117E-05 |
| TR546-c0_g1   | 17  | 53   | -1.640457613 | 8.36367E-06 | 8.29117E-05 |
| TR9369-c1_g1  | 17  | 53   | -1.640457613 | 8.36367E-06 | 8.29117E-05 |
| TR7782-c0_g1  | 16  | 50   | -1.64385619  | 1.4641E-05  | 0.000139215 |
| TR10358-c0_g1 | 8   | 25   | -1.64385619  | 0.002179766 | 0.011653747 |

|               |     |      |              |             |             |
|---------------|-----|------|--------------|-------------|-------------|
| TR12274-c1_g1 | 8   | 25   | -1.64385619  | 0.002179766 | 0.011653747 |
| TR22186-c0_g1 | 8   | 25   | -1.64385619  | 0.002179766 | 0.011653747 |
| TR24305-c0_g1 | 8   | 25   | -1.64385619  | 0.002179766 | 0.011653747 |
| TR8266-c0_g1  | 8   | 25   | -1.64385619  | 0.002179766 | 0.011653747 |
| TR13763-c6_g1 | 406 | 1270 | -1.645276864 | 5.1347E-106 | 1.0646E-103 |
| TR12810-c1_g1 | 43  | 135  | -1.650550842 | 9.18483E-13 | 2.11019E-11 |
| TR16039-c0_g1 | 43  | 135  | -1.650550842 | 9.18483E-13 | 2.11019E-11 |
| TR10563-c0_g1 | 7   | 22   | -1.652076697 | 0.003915043 | 0.019226144 |
| TR11843-c0_g1 | 7   | 22   | -1.652076697 | 0.003915043 | 0.019226144 |
| TR21451-c0_g1 | 7   | 22   | -1.652076697 | 0.003915043 | 0.019226144 |
| TR3674-c0_g1  | 7   | 22   | -1.652076697 | 0.003915043 | 0.019226144 |
| TR9234-c0_g1  | 7   | 22   | -1.652076697 | 0.003915043 | 0.019226144 |
| TR15437-c5_g1 | 57  | 180  | -1.658963082 | 1.26565E-16 | 3.77505E-15 |
| TR11798-c0_g1 | 25  | 79   | -1.659924558 | 4.12975E-08 | 5.8607E-07  |
| TR572-c4_g1   | 58  | 184  | -1.665580961 | 4.79491E-17 | 1.46618E-15 |
| TR21504-c2_g2 | 40  | 127  | -1.666756592 | 3.05969E-12 | 6.79983E-11 |
| TR10786-c0_g2 | 17  | 54   | -1.667424661 | 5.38287E-06 | 5.49469E-05 |
| TR12918-c0_g2 | 16  | 51   | -1.672425342 | 9.40699E-06 | 9.24992E-05 |
| TR24280-c0_g1 | 30  | 96   | -1.678071905 | 1.10895E-09 | 1.89865E-08 |
| TR4129-c0_g1  | 103 | 330  | -1.679821687 | 1.22565E-29 | 6.9459E-28  |
| TR25479-c0_g2 | 9   | 29   | -1.688055994 | 0.000772259 | 0.004880828 |
| TR299-c0_g1   | 9   | 29   | -1.688055994 | 0.000772259 | 0.004880828 |
| TR11839-c2_g1 | 39  | 126  | -1.691877705 | 2.21311E-12 | 4.96383E-11 |
| TR16222-c0_g1 | 16  | 52   | -1.700439718 | 6.02015E-06 | 6.12511E-05 |
| TR22426-c0_g1 | 16  | 52   | -1.700439718 | 6.02015E-06 | 6.12511E-05 |
| TR27762-c0_g1 | 8   | 26   | -1.700439718 | 0.001373799 | 0.008015239 |
| TR9461-c0_g1  | 8   | 26   | -1.700439718 | 0.001373799 | 0.008015239 |
| TR18966-c0_g1 | 44  | 144  | -1.710493383 | 3.9579E-14  | 1.00884E-12 |
| TR11215-c3_g1 | 40  | 131  | -1.711494907 | 5.36095E-13 | 1.25197E-11 |
| TR13439-c0_g1 | 7   | 23   | -1.716207034 | 0.002452562 | 0.013005865 |
| TR19705-c0_g1 | 7   | 23   | -1.716207034 | 0.002452562 | 0.013005865 |
| TR8753-c0_g2  | 7   | 23   | -1.716207034 | 0.002452562 | 0.013005865 |
| TR3829-c0_g1  | 10  | 33   | -1.722466024 | 0.000275267 | 0.001963787 |
| TR8287-c2_g1  | 49  | 162  | -1.725140159 | 7.11064E-16 | 2.04206E-14 |
| TR20298-c0_g1 | 16  | 53   | -1.727920455 | 3.83794E-06 | 4.02034E-05 |
| TR6438-c0_g1  | 16  | 53   | -1.727920455 | 3.83794E-06 | 4.02034E-05 |
| TR2626-c8_g1  | 88  | 292  | -1.73039294  | 1.86765E-27 | 9.74006E-26 |
| TR922-c0_g1   | 36  | 120  | -1.736965594 | 3.01577E-12 | 6.711E-11   |
| TR1059-c0_g1  | 15  | 50   | -1.736965594 | 6.68501E-06 | 6.77722E-05 |
| TR10714-c0_g1 | 9   | 30   | -1.736965594 | 0.000486017 | 0.003226446 |
| TR13226-c0_g1 | 9   | 30   | -1.736965594 | 0.000486017 | 0.003226446 |
| TR23370-c0_g1 | 9   | 30   | -1.736965594 | 0.000486017 | 0.003226446 |
| TR14516-c0_g1 | 6   | 20   | -1.736965594 | 0.004396589 | 0.021253291 |
| TR16332-c0_g1 | 6   | 20   | -1.736965594 | 0.004396589 | 0.021253291 |

|               |     |     |              |             |             |
|---------------|-----|-----|--------------|-------------|-------------|
| TR19535-c0_g1 | 6   | 20  | -1.736965594 | 0.004396589 | 0.021253291 |
| TR4005-c0_g1  | 17  | 57  | -1.745427173 | 1.40348E-06 | 1.57916E-05 |
| TR18966-c0_g2 | 45  | 151 | -1.746551643 | 3.95805E-15 | 1.08887E-13 |
| TR9467-c0_g1  | 14  | 47  | -1.74723393  | 1.16516E-05 | 0.000113067 |
| TR489-c12_g1  | 107 | 360 | -1.75038611  | 5.74108E-34 | 3.84275E-32 |
| TR11751-c0_g1 | 38  | 128 | -1.752072487 | 4.20398E-13 | 9.92683E-12 |
| TR15889-c0_g1 | 8   | 27  | -1.754887502 | 0.000859935 | 0.005276083 |
| TR16774-c0_g1 | 8   | 27  | -1.754887502 | 0.000859935 | 0.005276083 |
| TR676-c0_g1   | 8   | 27  | -1.754887502 | 0.000859935 | 0.005276083 |
| TR10975-c0_g1 | 29  | 98  | -1.756728849 | 2.09537E-10 | 3.87219E-09 |
| TR14986-c1_g1 | 13  | 44  | -1.7589919   | 2.03215E-05 | 0.000188279 |
| TR17558-c0_g1 | 36  | 122 | -1.760812336 | 1.23824E-12 | 2.83334E-11 |
| TR25331-c0_g1 | 12  | 41  | -1.772589504 | 3.54656E-05 | 0.000314268 |
| TR27019-c0_g1 | 12  | 41  | -1.772589504 | 3.54656E-05 | 0.000314268 |
| TR12123-c0_g3 | 7   | 24  | -1.777607579 | 0.001525    | 0.008759127 |
| TR21953-c0_g1 | 7   | 24  | -1.777607579 | 0.001525    | 0.008759127 |
| TR23627-c0_g1 | 7   | 24  | -1.777607579 | 0.001525    | 0.008759127 |
| TR8284-c0_g1  | 7   | 24  | -1.777607579 | 0.001525    | 0.008759127 |
| TR2127-c0_g2  | 44  | 151 | -1.778973121 | 1.78111E-15 | 4.99689E-14 |
| TR16349-c0_g1 | 18  | 62  | -1.784271309 | 3.25652E-07 | 4.10112E-06 |
| TR10741-c0_g2 | 9   | 31  | -1.784271309 | 0.000304052 | 0.002148438 |
| TR24931-c0_g1 | 9   | 31  | -1.784271309 | 0.000304052 | 0.002148438 |
| TR25331-c0_g2 | 11  | 38  | -1.788495895 | 6.19334E-05 | 0.000514387 |
| TR13907-c0_g1 | 13  | 45  | -1.791413378 | 1.28003E-05 | 0.000122673 |
| TR7155-c0_g1  | 10  | 35  | -1.807354922 | 0.000108212 | 0.000852525 |
| TR27762-c0_g3 | 8   | 28  | -1.807354922 | 0.000534836 | 0.003515818 |
| TR21312-c0_g1 | 6   | 21  | -1.807354922 | 0.002710859 | 0.014277628 |
| TR23637-c0_g1 | 6   | 21  | -1.807354922 | 0.002710859 | 0.014277628 |
| TR25876-c0_g2 | 6   | 21  | -1.807354922 | 0.002710859 | 0.014277628 |
| TR3634-c0_g2  | 6   | 21  | -1.807354922 | 0.002710859 | 0.014277628 |
| TR17965-c0_g2 | 19  | 67  | -1.818161677 | 7.52861E-08 | 1.02315E-06 |
| TR6628-c0_g1  | 153 | 541 | -1.822096941 | 6.77466E-53 | 6.93845E-51 |
| TR22807-c0_g1 | 13  | 46  | -1.823122238 | 8.0297E-06  | 7.9787E-05  |
| TR20778-c0_g1 | 22  | 78  | -1.8259706   | 5.89865E-09 | 9.23433E-08 |
| TR5607-c0_g2  | 11  | 39  | -1.8259706   | 3.87162E-05 | 0.000339292 |
| TR2583-c1_g1  | 54  | 192 | -1.830074999 | 5.97244E-20 | 2.11982E-18 |
| TR7575-c0_g1  | 32  | 114 | -1.832890014 | 1.74345E-12 | 3.94161E-11 |
| TR12123-c0_g1 | 7   | 25  | -1.836501268 | 0.000941696 | 0.005738959 |
| TR10078-c0_g1 | 213 | 765 | -1.844606317 | 2.96526E-75 | 4.54174E-73 |
| TR8301-c0_g1  | 20  | 72  | -1.847996907 | 1.73556E-08 | 2.56804E-07 |
| TR12918-c0_g1 | 10  | 36  | -1.847996907 | 6.73289E-05 | 0.000554056 |
| TR14888-c0_g1 | 5   | 18  | -1.847996907 | 0.004829757 | 0.023182455 |
| TR16215-c0_g1 | 5   | 18  | -1.847996907 | 0.004829757 | 0.023182455 |
| TR26249-c0_g1 | 5   | 18  | -1.847996907 | 0.004829757 | 0.023182455 |

|               |     |     |              |             |             |
|---------------|-----|-----|--------------|-------------|-------------|
| TR8191-c0_g2  | 5   | 18  | -1.847996907 | 0.004829757 | 0.023182455 |
| TR16774-c0_g2 | 23  | 83  | -1.851477475 | 1.36621E-09 | 2.30889E-08 |
| TR1624-c0_g1  | 18  | 65  | -1.852442812 | 8.13589E-08 | 1.1048E-06  |
| TR15918-c0_g1 | 24  | 87  | -1.857980995 | 5.02654E-10 | 8.99556E-09 |
| TR27536-c0_g3 | 16  | 58  | -1.857980995 | 3.83172E-07 | 4.74813E-06 |
| TR14555-c0_g1 | 8   | 29  | -1.857980995 | 0.000330641 | 0.002315215 |
| TR14664-c0_g1 | 8   | 29  | -1.857980995 | 0.000330641 | 0.002315215 |
| TR22326-c0_g1 | 8   | 29  | -1.857980995 | 0.000330641 | 0.002315215 |
| TR1624-c0_g2  | 22  | 80  | -1.862496476 | 2.33615E-09 | 3.83006E-08 |
| TR20299-c0_g1 | 54  | 197 | -1.867164317 | 6.08958E-21 | 2.30069E-19 |
| TR17258-c0_g1 | 12  | 44  | -1.874469118 | 8.65854E-06 | 8.53867E-05 |
| TR5607-c0_g1  | 12  | 44  | -1.874469118 | 8.65854E-06 | 8.53867E-05 |
| TR23553-c0_g1 | 9   | 33  | -1.874469118 | 0.000117037 | 0.000917795 |
| TR465-c0_g1   | 6   | 22  | -1.874469118 | 0.001658969 | 0.009342828 |
| TR5460-c0_g2  | 6   | 22  | -1.874469118 | 0.001658969 | 0.009342828 |
| TR13734-c0_g1 | 65  | 239 | -1.878498995 | 2.96783E-25 | 1.35274E-23 |
| TR17155-c0_g1 | 53  | 195 | -1.879409859 | 6.51207E-21 | 2.44942E-19 |
| TR26926-c0_g1 | 65  | 240 | -1.884522783 | 1.8729E-25  | 8.69992E-24 |
| TR22326-c0_g2 | 10  | 37  | -1.887525271 | 4.16915E-05 | 0.000359802 |
| TR4836-c0_g1  | 10  | 37  | -1.887525271 | 4.16915E-05 | 0.000359802 |
| TR8157-c0_g1  | 10  | 37  | -1.887525271 | 4.16915E-05 | 0.000359802 |
| TR17993-c0_g3 | 21  | 78  | -1.893084796 | 2.49797E-09 | 4.08353E-08 |
| TR14664-c0_g2 | 7   | 26  | -1.893084796 | 0.000577759 | 0.003773598 |
| TR5460-c0_g1  | 7   | 26  | -1.893084796 | 0.000577759 | 0.003773598 |
| TR5887-c0_g2  | 7   | 26  | -1.893084796 | 0.000577759 | 0.003773598 |
| TR2832-c0_g1  | 18  | 67  | -1.896164189 | 3.18097E-08 | 4.60262E-07 |
| TR11751-c0_g2 | 29  | 108 | -1.896906507 | 2.14919E-12 | 4.82683E-11 |
| TR7745-c1_g1  | 69  | 257 | -1.897100092 | 2.28915E-27 | 1.17935E-25 |
| TR56-c0_g2    | 22  | 82  | -1.898120386 | 9.16547E-10 | 1.59168E-08 |
| TR6431-c0_g1  | 63  | 236 | -1.905363126 | 2.11914E-25 | 9.79027E-24 |
| TR7598-c1_g1  | 176 | 660 | -1.906890596 | 4.9313E-68  | 6.70709E-66 |
| TR6545-c0_g2  | 40  | 150 | -1.906890596 | 9.79038E-17 | 2.93562E-15 |
| TR12974-c0_g1 | 12  | 45  | -1.906890596 | 5.36751E-06 | 5.48736E-05 |
| TR3903-c3_g1  | 174 | 654 | -1.91020333  | 1.39537E-67 | 1.88279E-65 |
| TR10786-c0_g1 | 17  | 64  | -1.912537159 | 5.42798E-08 | 7.6141E-07  |
| TR1192-c0_g1  | 9   | 34  | -1.91753784  | 7.20537E-05 | 0.000590081 |
| TR13863-c0_g1 | 9   | 34  | -1.91753784  | 7.20537E-05 | 0.000590081 |
| TR15956-c0_g1 | 9   | 34  | -1.91753784  | 7.20537E-05 | 0.000590081 |
| TR20281-c0_g1 | 62  | 235 | -1.922320636 | 1.40951E-25 | 6.60155E-24 |
| TR10079-c0_g1 | 25  | 95  | -1.925999419 | 2.84255E-11 | 5.76009E-10 |
| TR18972-c0_g1 | 10  | 38  | -1.925999419 | 2.56988E-05 | 0.000233519 |
| TR3190-c0_g1  | 10  | 38  | -1.925999419 | 2.56988E-05 | 0.000233519 |
| TR14928-c0_g1 | 5   | 19  | -1.925999419 | 0.002921433 | 0.015198354 |
| TR6482-c0_g1  | 184 | 701 | -1.929708678 | 2.95937E-73 | 4.37506E-71 |



|               |    |     |              |             |             |
|---------------|----|-----|--------------|-------------|-------------|
| TR2625-c2_g1  | 78 | 298 | -1.933766302 | 3.14789E-32 | 1.93907E-30 |
| TR13641-c0_g1 | 54 | 207 | -1.938599455 | 5.87731E-23 | 2.43119E-21 |
| TR3127-c0_g3  | 6  | 23  | -1.938599455 | 0.001008237 | 0.006116087 |
| TR5124-c0_g1  | 6  | 23  | -1.938599455 | 0.001008237 | 0.006116087 |
| TR345-c0_g1   | 20 | 77  | -1.944858446 | 1.6466E-09  | 2.74723E-08 |
| TR21760-c0_g1 | 14 | 54  | -1.94753258  | 4.33458E-07 | 5.33625E-06 |
| TR3234-c0_g1  | 14 | 54  | -1.94753258  | 4.33458E-07 | 5.33625E-06 |
| TR8256-c0_g3  | 14 | 54  | -1.94753258  | 4.33458E-07 | 5.33625E-06 |
| TR3983-c0_g1  | 53 | 205 | -1.951559645 | 6.17453E-23 | 2.54794E-21 |
| TR20343-c0_g1 | 16 | 62  | -1.95419631  | 5.72565E-08 | 8.00523E-07 |
| TR12118-c0_g1 | 9  | 35  | -1.959358016 | 4.41478E-05 | 0.000379652 |
| TR9369-c1_g2  | 9  | 35  | -1.959358016 | 4.41478E-05 | 0.000379652 |
| TR13815-c0_g1 | 66 | 258 | -1.966833136 | 1.01995E-28 | 5.50493E-27 |
| TR558-c3_g1   | 76 | 298 | -1.971241007 | 5.29579E-33 | 3.39757E-31 |
| TR15636-c0_g1 | 29 | 114 | -1.974909019 | 1.26336E-13 | 3.12646E-12 |
| TR24288-c0_g1 | 15 | 59  | -1.975752454 | 9.70756E-08 | 1.30881E-06 |
| TR12243-c0_g1 | 19 | 75  | -1.980891177 | 1.72318E-09 | 2.86377E-08 |
| TR14901-c1_g1 | 23 | 91  | -1.984232684 | 3.125E-11   | 6.30987E-10 |
| TR10054-c5_g1 | 14 | 56  | -2           | 1.64198E-07 | 2.15233E-06 |
| TR267-c1_g1   | 10 | 40  | -2           | 9.63981E-06 | 9.46244E-05 |
| TR25166-c0_g1 | 9  | 36  | -2           | 2.6927E-05  | 0.000244027 |
| TR2988-c0_g1  | 6  | 24  | -2           | 0.000608844 | 0.003949748 |
| TR797-c0_g1   | 6  | 24  | -2           | 0.000608844 | 0.003949748 |
| TR15975-c0_g1 | 5  | 20  | -2           | 0.001754078 | 0.009745637 |
| TR18109-c0_g1 | 5  | 20  | -2           | 0.001754078 | 0.009745637 |
| TR18411-c0_g1 | 5  | 20  | -2           | 0.001754078 | 0.009745637 |
| TR20861-c0_g2 | 5  | 20  | -2           | 0.001754078 | 0.009745637 |
| TR22060-c0_g1 | 5  | 20  | -2           | 0.001754078 | 0.009745637 |
| TR25857-c0_g1 | 5  | 20  | -2           | 0.001754078 | 0.009745637 |
| TR27289-c0_g1 | 5  | 20  | -2           | 0.001754078 | 0.009745637 |
| TR6649-c0_g1  | 5  | 20  | -2           | 0.001754078 | 0.009745637 |
| TR7462-c0_g2  | 5  | 20  | -2           | 0.001754078 | 0.009745637 |
| TR26281-c1_g1 | 40 | 161 | -2.008988783 | 5.39085E-19 | 1.8221E-17  |
| TR472-c4_g1   | 66 | 267 | -2.016301812 | 1.42049E-30 | 8.35649E-29 |
| TR19757-c0_g1 | 52 | 211 | -2.020659471 | 1.43514E-24 | 6.35396E-23 |
| TR10248-c0_g1 | 15 | 61  | -2.023846742 | 3.66263E-08 | 5.25038E-07 |
| TR499-c0_g1   | 24 | 98  | -2.029747343 | 2.70086E-12 | 6.01811E-11 |
| TR14739-c0_g1 | 9  | 37  | -2.039528364 | 1.63528E-05 | 0.000153517 |
| TR4573-c0_g1  | 8  | 33  | -2.044394119 | 4.57794E-05 | 0.000392689 |
| TR2731-c1_g1  | 44 | 182 | -2.048363022 | 9.23739E-22 | 3.63537E-20 |
| TR6634-c0_g1  | 14 | 58  | -2.050626073 | 6.14662E-08 | 8.52371E-07 |
| TR21056-c0_g1 | 7  | 29  | -2.050626073 | 0.00012889  | 0.000999222 |
| TR21056-c0_g2 | 7  | 29  | -2.050626073 | 0.00012889  | 0.000999222 |
| TR5619-c0_g1  | 7  | 29  | -2.050626073 | 0.00012889  | 0.000999222 |

|               |    |     |              |             |             |
|---------------|----|-----|--------------|-------------|-------------|
| TR8071-c0_g1  | 34 | 141 | -2.052088511 | 3.00788E-17 | 9.34881E-16 |
| TR13769-c1_g1 | 40 | 166 | -2.053111336 | 4.84122E-20 | 1.73644E-18 |
| TR567-c1_g1   | 13 | 54  | -2.054447784 | 1.68947E-07 | 2.20947E-06 |
| TR16397-c0_g1 | 12 | 50  | -2.058893689 | 4.6538E-07  | 5.69214E-06 |
| TR15260-c0_g1 | 6  | 25  | -2.058893689 | 0.00036549  | 0.002533146 |
| TR22033-c0_g1 | 6  | 25  | -2.058893689 | 0.00036549  | 0.002533146 |
| TR23606-c0_g1 | 6  | 25  | -2.058893689 | 0.00036549  | 0.002533146 |
| TR27536-c0_g1 | 6  | 25  | -2.058893689 | 0.00036549  | 0.002533146 |
| TR8914-c0_g1  | 6  | 25  | -2.058893689 | 0.00036549  | 0.002533146 |
| TR1449-c0_g2  | 11 | 46  | -2.064130337 | 1.28514E-06 | 1.4537E-05  |
| TR23653-c0_g1 | 11 | 46  | -2.064130337 | 1.28514E-06 | 1.4537E-05  |
| TR2577-c3_g1  | 61 | 256 | -2.069262662 | 2.58824E-30 | 1.50697E-28 |
| TR3113-c0_g1  | 10 | 42  | -2.070389328 | 3.55916E-06 | 3.78191E-05 |
| TR3172-c0_g1  | 5  | 21  | -2.070389328 | 0.001046083 | 0.006306663 |
| TR9515-c0_g1  | 5  | 21  | -2.070389328 | 0.001046083 | 0.006306663 |
| TR21631-c0_g2 | 9  | 38  | -2.078002512 | 9.89047E-06 | 9.69729E-05 |
| TR7593-c0_g1  | 16 | 68  | -2.087462841 | 3.04578E-09 | 4.94578E-08 |
| TR25166-c0_g2 | 8  | 34  | -2.087462841 | 2.75951E-05 | 0.000249019 |
| TR3946-c0_g1  | 8  | 34  | -2.087462841 | 2.75951E-05 | 0.000249019 |
| TR4573-c0_g2  | 8  | 34  | -2.087462841 | 2.75951E-05 | 0.000249019 |
| TR18983-c0_g1 | 4  | 17  | -2.087462841 | 0.00303182  | 0.015332054 |
| TR22548-c0_g1 | 4  | 17  | -2.087462841 | 0.00303182  | 0.015332054 |
| TR3250-c0_g1  | 4  | 17  | -2.087462841 | 0.00303182  | 0.015332054 |
| TR3257-c0_g1  | 4  | 17  | -2.087462841 | 0.00303182  | 0.015332054 |
| TR3297-c0_g1  | 4  | 17  | -2.087462841 | 0.00303182  | 0.015332054 |
| TR7516-c0_g1  | 4  | 17  | -2.087462841 | 0.00303182  | 0.015332054 |
| TR9296-c0_g1  | 4  | 17  | -2.087462841 | 0.00303182  | 0.015332054 |
| TR19767-c0_g1 | 6  | 26  | -2.115477217 | 0.0002182   | 0.001608014 |
| TR9207-c0_g1  | 6  | 26  | -2.115477217 | 0.0002182   | 0.001608014 |
| TR21-c0_g1    | 11 | 48  | -2.125530882 | 4.70183E-07 | 5.74675E-06 |
| TR26940-c0_g1 | 16 | 70  | -2.129283017 | 1.12334E-09 | 1.92136E-08 |
| TR10134-c0_g1 | 5  | 22  | -2.137503524 | 0.000620009 | 0.004001886 |
| TR12974-c0_g2 | 5  | 22  | -2.137503524 | 0.000620009 | 0.004001886 |
| TR14621-c0_g1 | 7  | 31  | -2.146841388 | 4.62242E-05 | 0.000395507 |
| TR4942-c0_g1  | 7  | 31  | -2.146841388 | 4.62242E-05 | 0.000395507 |
| TR9163-c0_g1  | 7  | 31  | -2.146841388 | 4.62242E-05 | 0.000395507 |
| TR22991-c0_g1 | 16 | 71  | -2.14974712  | 6.79925E-10 | 1.19171E-08 |
| TR7650-c0_g1  | 62 | 279 | -2.169925001 | 8.61837E-35 | 5.93213E-33 |
| TR14705-c0_g1 | 12 | 54  | -2.169925001 | 6.2132E-08  | 8.58802E-07 |
| TR24153-c0_g2 | 12 | 54  | -2.169925001 | 6.2132E-08  | 8.58802E-07 |
| TR5153-c0_g1  | 12 | 54  | -2.169925001 | 6.2132E-08  | 8.58802E-07 |
| TR26115-c0_g1 | 10 | 45  | -2.169925001 | 7.77446E-07 | 9.16617E-06 |
| TR5139-c1_g1  | 6  | 27  | -2.169925001 | 0.000129603 | 0.001002921 |
| TR11553-c0_g1 | 4  | 18  | -2.169925001 | 0.001778689 | 0.009850183 |

|               |     |     |              |             |             |
|---------------|-----|-----|--------------|-------------|-------------|
| TR13299-c0_g1 | 4   | 18  | -2.169925001 | 0.001778689 | 0.009850183 |
| TR13362-c0_g1 | 4   | 18  | -2.169925001 | 0.001778689 | 0.009850183 |
| TR22548-c0_g2 | 4   | 18  | -2.169925001 | 0.001778689 | 0.009850183 |
| TR26121-c0_g1 | 4   | 18  | -2.169925001 | 0.001778689 | 0.009850183 |
| TR3851-c0_g1  | 4   | 18  | -2.169925001 | 0.001778689 | 0.009850183 |
| TR5195-c0_g1  | 4   | 18  | -2.169925001 | 0.001778689 | 0.009850183 |
| TR7015-c0_g2  | 4   | 18  | -2.169925001 | 0.001778689 | 0.009850183 |
| TR13317-c0_g1 | 64  | 290 | -2.17990909  | 2.73029E-36 | 1.95859E-34 |
| TR21-c0_g2    | 11  | 50  | -2.184424571 | 1.69904E-07 | 2.22029E-06 |
| TR19918-c0_g1 | 104 | 473 | -2.185256655 | 2.94428E-58 | 3.47615E-56 |
| TR4701-c0_g1  | 47  | 214 | -2.186878135 | 2.55931E-27 | 1.31059E-25 |
| TR17258-c0_g2 | 9   | 41  | -2.187627003 | 2.13915E-06 | 2.3373E-05  |
| TR16433-c0_g1 | 108 | 493 | -2.190556334 | 8.07306E-61 | 9.80377E-59 |
| TR22067-c0_g1 | 7   | 32  | -2.192645078 | 2.74975E-05 | 0.000248667 |
| TR8473-c0_g1  | 40  | 183 | -2.193771743 | 1.10848E-23 | 4.75901E-22 |
| TR913-c0_g1   | 12  | 55  | -2.196397213 | 3.72944E-08 | 5.33266E-07 |
| TR2653-c0_g4  | 15  | 69  | -2.201633861 | 6.7027E-10  | 1.176E-08   |
| TR12991-c0_g2 | 5   | 23  | -2.201633861 | 0.000365399 | 0.002533146 |
| TR19400-c0_g1 | 5   | 23  | -2.201633861 | 0.000365399 | 0.002533146 |
| TR573-c0_g1   | 5   | 23  | -2.201633861 | 0.000365399 | 0.002533146 |
| TR8284-c0_g2  | 5   | 23  | -2.201633861 | 0.000365399 | 0.002533146 |
| TR8813-c0_g2  | 11  | 51  | -2.212993723 | 1.01691E-07 | 1.36563E-06 |
| TR11851-c0_g1 | 12  | 56  | -2.222392421 | 2.23274E-08 | 3.27519E-07 |
| TR5319-c0_g2  | 9   | 42  | -2.222392421 | 1.27514E-06 | 1.44431E-05 |
| TR1449-c0_g1  | 10  | 47  | -2.232660757 | 2.77488E-07 | 3.50756E-06 |
| TR12200-c0_g1 | 14  | 66  | -2.237039197 | 1.0875E-09  | 1.86569E-08 |
| TR2724-c0_g2  | 7   | 33  | -2.237039197 | 1.62906E-05 | 0.000153187 |
| TR3040-c0_g1  | 7   | 33  | -2.237039197 | 1.62906E-05 | 0.000153187 |
| TR4942-c0_g2  | 7   | 33  | -2.237039197 | 1.62906E-05 | 0.000153187 |
| TR840-c0_g1   | 7   | 33  | -2.237039197 | 1.62906E-05 | 0.000153187 |
| TR17965-c0_g1 | 47  | 222 | -2.239827015 | 4.60017E-29 | 2.53926E-27 |
| TR12551-c0_g1 | 12  | 57  | -2.247927513 | 1.33333E-08 | 1.99898E-07 |
| TR16788-c0_g1 | 12  | 57  | -2.247927513 | 1.33333E-08 | 1.99898E-07 |
| TR15620-c0_g1 | 8   | 38  | -2.247927513 | 3.49956E-06 | 3.72089E-05 |
| TR13221-c0_g1 | 4   | 19  | -2.247927513 | 0.001036953 | 0.006258281 |
| TR17985-c0_g1 | 4   | 19  | -2.247927513 | 0.001036953 | 0.006258281 |
| TR3820-c0_g1  | 4   | 19  | -2.247927513 | 0.001036953 | 0.006258281 |
| TR66-c0_g1    | 4   | 19  | -2.247927513 | 0.001036953 | 0.006258281 |
| TR8776-c0_g3  | 4   | 19  | -2.247927513 | 0.001036953 | 0.006258281 |
| TR3845-c0_g1  | 17  | 81  | -2.252387162 | 1.19159E-11 | 2.50416E-10 |
| TR17687-c0_g1 | 9   | 43  | -2.256339753 | 7.57666E-07 | 8.93915E-06 |
| TR27361-c0_g2 | 9   | 43  | -2.256339753 | 7.57666E-07 | 8.93915E-06 |
| TR9411-c0_g2  | 10  | 48  | -2.263034406 | 1.65049E-07 | 2.16016E-06 |
| TR11961-c0_g1 | 5   | 24  | -2.263034406 | 0.000214228 | 0.001581488 |

|               |    |     |              |             |             |
|---------------|----|-----|--------------|-------------|-------------|
| TR13302-c0_g1 | 5  | 24  | -2.263034406 | 0.000214228 | 0.001581488 |
| TR19722-c0_g1 | 5  | 24  | -2.263034406 | 0.000214228 | 0.001581488 |
| TR5579-c0_g1  | 5  | 24  | -2.263034406 | 0.000214228 | 0.001581488 |
| TR10047-c0_g1 | 24 | 116 | -2.273018494 | 3.35801E-16 | 9.80938E-15 |
| TR10671-c0_g1 | 6  | 29  | -2.273018494 | 4.50895E-05 | 0.000387358 |
| TR624-c0_g1   | 6  | 29  | -2.273018494 | 4.50895E-05 | 0.000387358 |
| TR24028-c0_g1 | 7  | 34  | -2.280107919 | 9.61401E-06 | 9.44257E-05 |
| TR24153-c0_g1 | 9  | 44  | -2.289506617 | 4.48812E-07 | 5.50533E-06 |
| TR9411-c0_g1  | 10 | 49  | -2.292781749 | 9.78977E-08 | 1.31677E-06 |
| TR11851-c0_g3 | 13 | 64  | -2.299560282 | 1.04212E-09 | 1.79325E-08 |
| TR56-c0_g1    | 52 | 259 | -2.31636857  | 6.17409E-35 | 4.2844E-33  |
| TR11621-c0_g1 | 13 | 65  | -2.321928095 | 6.18531E-10 | 1.09086E-08 |
| TR21235-c0_g2 | 8  | 40  | -2.321928095 | 1.21998E-06 | 1.38849E-05 |
| TR22285-c0_g1 | 8  | 40  | -2.321928095 | 1.21998E-06 | 1.38849E-05 |
| TR2724-c0_g1  | 8  | 40  | -2.321928095 | 1.21998E-06 | 1.38849E-05 |
| TR18853-c0_g1 | 6  | 30  | -2.321928095 | 2.64269E-05 | 0.000239623 |
| TR975-c0_g1   | 6  | 30  | -2.321928095 | 2.64269E-05 | 0.000239623 |
| TR12350-c0_g2 | 5  | 25  | -2.321928095 | 0.000124999 | 0.000971717 |
| TR22755-c0_g1 | 5  | 25  | -2.321928095 | 0.000124999 | 0.000971717 |
| TR3886-c0_g1  | 5  | 25  | -2.321928095 | 0.000124999 | 0.000971717 |
| TR12576-c0_g1 | 4  | 20  | -2.321928095 | 0.000601108 | 0.003909577 |
| TR12301-c0_g1 | 3  | 15  | -2.321928095 | 0.002964202 | 0.015332054 |
| TR21640-c0_g1 | 3  | 15  | -2.321928095 | 0.002964202 | 0.015332054 |
| TR21640-c0_g2 | 3  | 15  | -2.321928095 | 0.002964202 | 0.015332054 |
| TR21988-c0_g1 | 3  | 15  | -2.321928095 | 0.002964202 | 0.015332054 |
| TR9150-c0_g1  | 3  | 15  | -2.321928095 | 0.002964202 | 0.015332054 |
| TR918-c0_g1   | 3  | 15  | -2.321928095 | 0.002964202 | 0.015332054 |
| TR9836-c0_g2  | 13 | 66  | -2.343954401 | 3.6637E-10  | 6.65468E-09 |
| TR22354-c0_g1 | 12 | 61  | -2.345774837 | 1.6563E-09  | 2.76072E-08 |
| TR13327-c0_g1 | 23 | 117 | -2.346802764 | 6.75839E-17 | 2.04088E-15 |
| TR8813-c0_g1  | 10 | 51  | -2.350497247 | 3.41712E-08 | 4.90671E-07 |
| TR24234-c0_g1 | 8  | 41  | -2.357552005 | 7.16931E-07 | 8.51172E-06 |
| TR17615-c0_g1 | 15 | 77  | -2.359895945 | 1.06957E-11 | 2.2533E-10  |
| TR15933-c0_g1 | 7  | 36  | -2.362570079 | 3.31274E-06 | 3.53331E-05 |
| TR807-c0_g1   | 7  | 36  | -2.362570079 | 3.31274E-06 | 3.53331E-05 |
| TR4868-c0_g1  | 15 | 78  | -2.378511623 | 6.32449E-12 | 1.36974E-10 |
| TR10073-c0_g1 | 5  | 26  | -2.378511623 | 7.26135E-05 | 0.000594093 |
| TR2729-c0_g1  | 14 | 73  | -2.382469637 | 2.84011E-11 | 5.76009E-10 |
| TR17603-c0_g1 | 17 | 89  | -2.38827059  | 1.86409E-13 | 4.54039E-12 |
| TR16788-c0_g3 | 12 | 63  | -2.392317423 | 5.76223E-10 | 1.01835E-08 |
| TR12676-c0_g2 | 4  | 21  | -2.392317423 | 0.000346672 | 0.00241751  |
| TR20861-c0_g1 | 4  | 21  | -2.392317423 | 0.000346672 | 0.00241751  |
| TR6281-c0_g1  | 4  | 21  | -2.392317423 | 0.000346672 | 0.00241751  |
| TR9630-c0_g2  | 4  | 21  | -2.392317423 | 0.000346672 | 0.00241751  |

|               |     |     |              |             |             |
|---------------|-----|-----|--------------|-------------|-------------|
| TR12692-c0_g1 | 3   | 16  | -2.415037499 | 0.00169017  | 0.009436823 |
| TR13320-c0_g1 | 3   | 16  | -2.415037499 | 0.00169017  | 0.009436823 |
| TR8408-c0_g1  | 3   | 16  | -2.415037499 | 0.00169017  | 0.009436823 |
| TR9188-c0_g1  | 3   | 16  | -2.415037499 | 0.00169017  | 0.009436823 |
| TR470-c6_g1   | 152 | 811 | -2.415630591 | 8.7964E-111 | 1.9422E-108 |
| TR11851-c0_g2 | 14  | 75  | -2.421463768 | 9.85863E-12 | 2.0873E-10  |
| TR16788-c0_g2 | 14  | 75  | -2.421463768 | 9.85863E-12 | 2.0873E-10  |
| TR3409-c0_g1  | 22  | 118 | -2.423211431 | 1.29872E-17 | 4.09648E-16 |
| TR2327-c0_g1  | 19  | 102 | -2.424497829 | 1.9288E-15  | 5.39344E-14 |
| TR13301-c0_g1 | 21  | 113 | -2.42786154  | 5.76224E-17 | 1.74316E-15 |
| TR26990-c1_g1 | 18  | 97  | -2.429987841 | 8.5836E-15  | 2.28376E-13 |
| TR2609-c7_g1  | 135 | 728 | -2.430979043 | 2.3884E-100 | 4.7772E-98  |
| TR7059-c0_g2  | 16  | 87  | -2.442943496 | 1.70463E-13 | 4.16392E-12 |
| TR4868-c0_g2  | 15  | 82  | -2.450661409 | 7.6081E-13  | 1.75744E-11 |
| TR21235-c0_g1 | 6   | 33  | -2.459431619 | 5.20371E-06 | 5.33594E-05 |
| TR11676-c0_g2 | 4   | 22  | -2.459431619 | 0.000199008 | 0.001477466 |
| TR7015-c0_g1  | 4   | 22  | -2.459431619 | 0.000199008 | 0.001477466 |
| TR7059-c0_g1  | 15  | 83  | -2.468148836 | 4.4635E-13  | 1.05104E-11 |
| TR9836-c0_g1  | 15  | 83  | -2.468148836 | 4.4635E-13  | 1.05104E-11 |
| TR883-c0_g1   | 13  | 72  | -2.469485283 | 1.52092E-11 | 3.14954E-10 |
| TR4024-c0_g1  | 53  | 295 | -2.47665069  | 1.37067E-42 | 1.10968E-40 |
| TR10567-c0_g1 | 7   | 39  | -2.478047297 | 6.54236E-07 | 7.87182E-06 |
| TR25501-c0_g1 | 7   | 39  | -2.478047297 | 6.54236E-07 | 7.87182E-06 |
| TR27484-c0_g1 | 7   | 39  | -2.478047297 | 6.54236E-07 | 7.87182E-06 |
| TR15680-c0_g1 | 5   | 28  | -2.485426827 | 2.42138E-05 | 0.000220732 |
| TR4137-c0_g1  | 5   | 28  | -2.485426827 | 2.42138E-05 | 0.000220732 |
| TR6653-c0_g1  | 13  | 73  | -2.489384841 | 8.89547E-12 | 1.89993E-10 |
| TR11621-c0_g2 | 11  | 62  | -2.494764692 | 3.05712E-10 | 5.60076E-09 |
| TR10671-c0_g2 | 6   | 34  | -2.502500341 | 3.00737E-06 | 3.23398E-05 |
| TR12602-c0_g1 | 6   | 34  | -2.502500341 | 3.00737E-06 | 3.23398E-05 |
| TR807-c0_g2   | 6   | 34  | -2.502500341 | 3.00737E-06 | 3.23398E-05 |
| TR25479-c0_g1 | 3   | 17  | -2.502500341 | 0.00095864  | 0.00583327  |
| TR4218-c0_g1  | 7   | 40  | -2.514573173 | 3.78831E-07 | 4.71841E-06 |
| TR4896-c0_g1  | 12  | 69  | -2.523561956 | 2.31822E-11 | 4.73712E-10 |
| TR16532-c0_g1 | 8   | 46  | -2.523561956 | 4.82148E-08 | 6.80262E-07 |
| TR16829-c0_g2 | 4   | 23  | -2.523561956 | 0.000113761 | 0.000894168 |
| TR2638-c0_g2  | 4   | 23  | -2.523561956 | 0.000113761 | 0.000894168 |
| TR3797-c0_g1  | 4   | 23  | -2.523561956 | 0.000113761 | 0.000894168 |
| TR11241-c0_g1 | 41  | 236 | -2.525091045 | 3.93795E-35 | 2.74386E-33 |
| TR6486-c0_g1  | 21  | 121 | -2.526545814 | 8.16141E-19 | 2.73678E-17 |
| TR6502-c0_g1  | 52  | 301 | -2.533179959 | 1.74819E-44 | 1.47136E-42 |
| TR5840-c0_g1  | 5   | 29  | -2.5360529   | 1.39076E-05 | 0.00013291  |
| TR5221-c0_g1  | 12  | 70  | -2.544320516 | 1.34885E-11 | 2.8235E-10  |
| TR7566-c0_g1  | 12  | 70  | -2.544320516 | 1.34885E-11 | 2.8235E-10  |

|               |    |     |              |             |             |
|---------------|----|-----|--------------|-------------|-------------|
| TR14476-c0_g1 | 45 | 263 | -2.547065893 | 2.5891E-39  | 1.94771E-37 |
| TR16582-c0_g1 | 11 | 66  | -2.584962501 | 3.48374E-11 | 6.9927E-10  |
| TR3169-c0_g4  | 9  | 54  | -2.584962501 | 2.07173E-09 | 3.41963E-08 |
| TR13273-c0_g1 | 8  | 48  | -2.584962501 | 1.61032E-08 | 2.38896E-07 |
| TR19567-c0_g2 | 8  | 48  | -2.584962501 | 1.61032E-08 | 2.38896E-07 |
| TR10330-c0_g1 | 7  | 42  | -2.584962501 | 1.26051E-07 | 1.66903E-06 |
| TR8906-c0_g2  | 7  | 42  | -2.584962501 | 1.26051E-07 | 1.66903E-06 |
| TR24297-c0_g1 | 6  | 36  | -2.584962501 | 9.9572E-07  | 1.15711E-05 |
| TR22958-c0_g1 | 4  | 24  | -2.584962501 | 6.47821E-05 | 0.000535691 |
| TR16368-c0_g1 | 3  | 18  | -2.584962501 | 0.000541208 | 0.003549864 |
| TR24117-c0_g3 | 3  | 18  | -2.584962501 | 0.000541208 | 0.003549864 |
| TR784-c0_g1   | 3  | 18  | -2.584962501 | 0.000541208 | 0.003549864 |
| TR10649-c0_g1 | 2  | 12  | -2.584962501 | 0.004733192 | 0.022809107 |
| TR10649-c0_g2 | 2  | 12  | -2.584962501 | 0.004733192 | 0.022809107 |
| TR19864-c0_g1 | 2  | 12  | -2.584962501 | 0.004733192 | 0.022809107 |
| TR5617-c0_g1  | 2  | 12  | -2.584962501 | 0.004733192 | 0.022809107 |
| TR9592-c0_g1  | 19 | 115 | -2.597562538 | 1.82305E-18 | 5.96043E-17 |
| TR17763-c0_g1 | 16 | 98  | -2.614709844 | 4.5629E-16  | 1.32607E-14 |
| TR479-c0_g1   | 13 | 81  | -2.639410285 | 1.15415E-13 | 2.86035E-12 |
| TR8299-c1_g2  | 35 | 220 | -2.652076697 | 1.42035E-34 | 9.73703E-33 |
| TR25922-c0_g2 | 10 | 63  | -2.655351829 | 5.14817E-11 | 1.01069E-09 |
| TR946-c0_g1   | 25 | 158 | -2.659924558 | 2.25533E-25 | 1.03631E-23 |
| TR8906-c0_g1  | 6  | 38  | -2.662965013 | 3.26229E-07 | 4.10534E-06 |
| TR15119-c0_g2 | 3  | 19  | -2.662965013 | 0.000304296 | 0.002148438 |
| TR27356-c0_g2 | 3  | 19  | -2.662965013 | 0.000304296 | 0.002148438 |
| TR9630-c0_g1  | 3  | 19  | -2.662965013 | 0.000304296 | 0.002148438 |
| TR11261-c0_g1 | 19 | 123 | -2.694586992 | 2.30756E-20 | 8.40076E-19 |
| TR14676-c0_g2 | 6  | 39  | -2.700439718 | 1.86067E-07 | 2.4148E-06  |
| TR13371-c0_g1 | 2  | 13  | -2.700439718 | 0.002616324 | 0.013822549 |
| TR25092-c0_g1 | 2  | 13  | -2.700439718 | 0.002616324 | 0.013822549 |
| TR25092-c0_g2 | 2  | 13  | -2.700439718 | 0.002616324 | 0.013822549 |
| TR23591-c0_g1 | 27 | 176 | -2.704544116 | 1.51741E-28 | 8.1639E-27  |
| TR530-c0_g1   | 21 | 137 | -2.70571466  | 1.36771E-22 | 5.58963E-21 |
| TR26862-c0_g1 | 8  | 53  | -2.727920455 | 1.00233E-09 | 1.72829E-08 |
| TR1985-c0_g1  | 3  | 20  | -2.736965594 | 0.000170476 | 0.001278646 |
| TR27610-c0_g1 | 20 | 134 | -2.744161096 | 1.95707E-22 | 7.90328E-21 |
| TR25922-c0_g1 | 10 | 67  | -2.744161096 | 5.58346E-12 | 1.217E-10   |
| TR10744-c0_g1 | 23 | 155 | -2.752562449 | 8.97524E-26 | 4.23864E-24 |
| TR10343-c0_g1 | 4  | 27  | -2.754887502 | 1.17299E-05 | 0.000113567 |
| TR2638-c0_g1  | 4  | 27  | -2.754887502 | 1.17299E-05 | 0.000113567 |
| TR3959-c0_g1  | 4  | 27  | -2.754887502 | 1.17299E-05 | 0.000113567 |
| TR931-c0_g1   | 4  | 27  | -2.754887502 | 1.17299E-05 | 0.000113567 |
| TR8524-c0_g1  | 26 | 176 | -2.7589919   | 4.152E-29   | 2.29933E-27 |
| TR6777-c0_g1  | 23 | 156 | -2.761840263 | 5.16304E-26 | 2.45878E-24 |

|                |     |      |              |             |             |
|----------------|-----|------|--------------|-------------|-------------|
| TR13819-c0_g1  | 5   | 34   | -2.765534746 | 8.31855E-07 | 9.76402E-06 |
| TR10330-c0_g2  | 6   | 41   | -2.772589504 | 6.01415E-08 | 8.35363E-07 |
| TR10744-c0_g2  | 22  | 151  | -2.778973121 | 2.20847E-25 | 1.01753E-23 |
| TR14903-c0_g1  | 15  | 103  | -2.779609932 | 8.01435E-18 | 2.54681E-16 |
| TR3749-c0_g1   | 10  | 69   | -2.786596362 | 1.8236E-12  | 4.10645E-11 |
| TR4006-c0_g1   | 11  | 76   | -2.788495895 | 1.37444E-13 | 3.38658E-12 |
| TR268-c0_g1    | 15  | 105  | -2.807354922 | 2.62665E-18 | 8.52225E-17 |
| TR2936-c0_g1   | 12  | 84   | -2.807354922 | 5.94214E-15 | 1.62158E-13 |
| TR17924-c0_g1  | 3   | 21   | -2.807354922 | 9.5202E-05  | 0.000757753 |
| TR19388-c0_g1  | 3   | 21   | -2.807354922 | 9.5202E-05  | 0.000757753 |
| TR9712-c0_g1   | 3   | 21   | -2.807354922 | 9.5202E-05  | 0.000757753 |
| TR10152-c0_g1  | 2   | 14   | -2.807354922 | 0.001440675 | 0.008350968 |
| TR13731-c0_g5  | 2   | 14   | -2.807354922 | 0.001440675 | 0.008350968 |
| TR19484-c0_g1  | 2   | 14   | -2.807354922 | 0.001440675 | 0.008350968 |
| TR3058-c0_g1   | 2   | 14   | -2.807354922 | 0.001440675 | 0.008350968 |
| TR6777-c0_g2   | 22  | 156  | -2.8259706   | 1.36924E-26 | 6.7086E-25  |
| TR795-c0_g1    | 11  | 78   | -2.8259706   | 4.47476E-14 | 1.13547E-12 |
| TR11219-c12_g2 | 335 | 2408 | -2.845602391 | 0           | 0           |
| TR13790-c0_g5  | 5   | 36   | -2.847996907 | 2.65096E-07 | 3.36845E-06 |
| TR840-c0_g2    | 5   | 36   | -2.847996907 | 2.65096E-07 | 3.36845E-06 |
| TR16335-c0_g1  | 4   | 29   | -2.857980995 | 3.70326E-06 | 3.90573E-05 |
| TR13818-c14_g1 | 397 | 2891 | -2.864357696 | 0           | 0           |
| TR23633-c0_g1  | 8   | 59   | -2.882643049 | 3.39046E-11 | 6.82965E-10 |
| TR3410-c0_g1   | 10  | 74   | -2.887525271 | 1.08836E-13 | 2.70519E-12 |
| TR24291-c0_g1  | 14  | 104  | -2.893084796 | 1.18262E-18 | 3.91932E-17 |
| TR4183-c0_g1   | 9   | 67   | -2.896164189 | 1.44187E-12 | 3.28163E-11 |
| TR9507-c0_g1   | 14  | 105  | -2.906890596 | 6.72467E-19 | 2.26392E-17 |
| TR22375-c0_g1  | 2   | 15   | -2.906890596 | 0.000790819 | 0.004964909 |
| TR23307-c0_g1  | 2   | 15   | -2.906890596 | 0.000790819 | 0.004964909 |
| TR27356-c0_g1  | 2   | 15   | -2.906890596 | 0.000790819 | 0.004964909 |
| TR5469-c0_g1   | 2   | 15   | -2.906890596 | 0.000790819 | 0.004964909 |
| TR6869-c0_g1   | 2   | 15   | -2.906890596 | 0.000790819 | 0.004964909 |
| TR15485-c0_g1  | 9   | 68   | -2.91753784  | 8.16556E-13 | 1.88365E-11 |
| TR15232-c1_g1  | 50  | 380  | -2.925999419 | 2.00912E-64 | 2.5877E-62  |
| TR9799-c0_g1   | 5   | 38   | -2.925999419 | 8.38257E-08 | 1.13648E-06 |
| TR10353-c0_g3  | 3   | 23   | -2.938599455 | 2.94499E-05 | 0.000263797 |
| TR25252-c0_g1  | 3   | 23   | -2.938599455 | 2.94499E-05 | 0.000263797 |
| TR3813-c0_g1   | 3   | 23   | -2.938599455 | 2.94499E-05 | 0.000263797 |
| TR22394-c0_g1  | 14  | 108  | -2.94753258  | 1.23083E-19 | 4.33245E-18 |
| TR14498-c0_g1  | 19  | 147  | -2.951744831 | 3.5048E-26  | 1.70246E-24 |
| TR19723-c0_g1  | 4   | 31   | -2.95419631  | 1.15886E-06 | 1.33212E-05 |
| TR5220-c0_g1   | 4   | 31   | -2.95419631  | 1.15886E-06 | 1.33212E-05 |
| TR8520-c0_g1   | 4   | 31   | -2.95419631  | 1.15886E-06 | 1.33212E-05 |

|               |     |      |              |             |             |
|---------------|-----|------|--------------|-------------|-------------|
| TR3876-c1_g1  | 60  | 467  | -2.960388144 | 1.2644E-79  | 2.02797E-77 |
| TR26988-c3_g1 | 164 | 1298 | -2.984522663 | 1.3859E-219 | 6.2005E-217 |
| TR14639-c0_g1 | 35  | 278  | -2.989658056 | 1.42918E-48 | 1.34988E-46 |
| TR11262-c0_g1 | 3   | 24   | -3           | 1.63231E-05 | 0.000153323 |
| TR20707-c0_g1 | 3   | 24   | -3           | 1.63231E-05 | 0.000153323 |
| TR21317-c0_g1 | 2   | 16   | -3           | 0.000432985 | 0.002943347 |
| TR23771-c0_g1 | 2   | 16   | -3           | 0.000432985 | 0.002943347 |
| TR5674-c0_g1  | 2   | 16   | -3           | 0.000432985 | 0.002943347 |
| TR8442-c0_g1  | 2   | 16   | -3           | 0.000432985 | 0.002943347 |
| TR5810-c0_g1  | 24  | 193  | -3.007494537 | 1.96269E-34 | 1.33473E-32 |
| TR609-c1_g1   | 57  | 461  | -3.015732926 | 5.44803E-80 | 8.99259E-78 |
| TR8256-c0_g2  | 31  | 253  | -3.028797264 | 6.88884E-45 | 5.91512E-43 |
| TR8299-c1_g1  | 23  | 188  | -3.031026896 | 8.05826E-34 | 5.33078E-32 |
| TR21069-c1_g1 | 5   | 41   | -3.03562391  | 1.47214E-08 | 2.19547E-07 |
| TR13349-c2_g1 | 155 | 1305 | -3.073709686 | 7.0892E-227 | 3.6523E-224 |
| TR2989-c0_g1  | 16  | 135  | -3.076815597 | 4.45637E-25 | 2.02038E-23 |
| TR8774-c0_g1  | 9   | 76   | -3.078002512 | 8.33231E-15 | 2.22736E-13 |
| TR14639-c0_g2 | 32  | 271  | -3.082149041 | 1.03448E-48 | 9.82541E-47 |
| TR19405-c0_g2 | 4   | 34   | -3.087462841 | 2.00139E-07 | 2.59149E-06 |
| TR27356-c0_g3 | 2   | 17   | -3.087462841 | 0.000236569 | 0.001729146 |
| TR22256-c0_g1 | 9   | 77   | -3.096861539 | 4.67878E-15 | 1.28299E-13 |
| TR10424-c0_g1 | 5   | 43   | -3.10433666  | 4.58432E-09 | 7.27727E-08 |
| TR17576-c0_g1 | 3   | 26   | -3.115477217 | 4.98654E-06 | 5.13494E-05 |
| TR20304-c7_g1 | 147 | 1277 | -3.118870465 | 5.306E-225  | 2.5774E-222 |
| TR15232-c1_g2 | 13  | 113  | -3.119739244 | 1.67065E-21 | 6.47001E-20 |
| TR19803-c0_g1 | 7   | 61   | -3.123382416 | 2.54259E-12 | 5.68781E-11 |
| TR7797-c7_g1  | 147 | 1294 | -3.137949557 | 3.2217E-229 | 1.7116E-226 |
| TR4595-c0_g3  | 43  | 381  | -3.147382433 | 5.10508E-69 | 7.05635E-67 |
| TR6467-c0_g2  | 34  | 302  | -3.150941898 | 3.87356E-55 | 4.3326E-53  |
| TR18649-c0_g1 | 6   | 54   | -3.169925001 | 3.33728E-11 | 6.7305E-10  |
| TR4898-c0_g1  | 5   | 45   | -3.169925001 | 1.42078E-09 | 2.39634E-08 |
| TR4898-c0_g2  | 5   | 45   | -3.169925001 | 1.42078E-09 | 2.39634E-08 |
| TR16497-c0_g2 | 2   | 18   | -3.169925001 | 0.000129036 | 0.000999443 |
| TR24117-c0_g1 | 2   | 18   | -3.169925001 | 0.000129036 | 0.000999443 |
| TR906-c0_g1   | 92  | 829  | -3.171666335 | 5.9812E-149 | 1.784E-146  |
| TR19896-c0_g1 | 4   | 37   | -3.209453366 | 3.41246E-08 | 4.90417E-07 |
| TR25673-c0_g2 | 3   | 28   | -3.222392421 | 1.51406E-06 | 1.69684E-05 |
| TR8895-c1_g2  | 3   | 28   | -3.222392421 | 1.51406E-06 | 1.69684E-05 |
| TR2160-c1_g1  | 13  | 122  | -3.230297619 | 9.1922E-24  | 3.96649E-22 |
| TR5215-c0_g1  | 5   | 47   | -3.232660757 | 4.38504E-10 | 7.89816E-09 |
| TR6467-c0_g1  | 36  | 339  | -3.235216462 | 4.42051E-63 | 5.567E-61   |
| TR2114-c0_g1  | 7   | 66   | -3.237039197 | 1.37767E-13 | 3.38962E-12 |
| TR5812-c0_g1  | 4   | 38   | -3.247927513 | 1.88791E-08 | 2.78377E-07 |
| TR13933-c0_g1 | 2   | 19   | -3.247927513 | 7.02867E-05 | 0.000577279 |



|               |     |      |              |             |             |
|---------------|-----|------|--------------|-------------|-------------|
| TR15119-c0_g3 | 2   | 19   | -3.247927513 | 7.02867E-05 | 0.000577279 |
| TR16497-c0_g3 | 2   | 19   | -3.247927513 | 7.02867E-05 | 0.000577279 |
| TR3119-c1_g1  | 11  | 105  | -3.254813899 | 8.44211E-21 | 3.14752E-19 |
| TR13736-c3_g3 | 9   | 86   | -3.256339753 | 2.51538E-17 | 7.86117E-16 |
| TR26375-c0_g1 | 46  | 441  | -3.26107289  | 4.70446E-82 | 7.99821E-80 |
| TR14778-c0_g1 | 19  | 183  | -3.267772325 | 3.78908E-35 | 2.651E-33   |
| TR5480-c0_g1  | 15  | 145  | -3.273018494 | 3.10695E-28 | 1.66108E-26 |
| TR7016-c0_g1  | 3   | 29   | -3.273018494 | 8.32749E-07 | 9.76402E-06 |
| TR8751-c0_g3  | 3   | 29   | -3.273018494 | 8.32749E-07 | 9.76402E-06 |
| TR27642-c0_g1 | 8   | 78   | -3.285402219 | 5.75679E-16 | 1.66734E-14 |
| TR5536-c0_g1  | 9   | 88   | -3.289506617 | 7.8226E-18  | 2.49053E-16 |
| TR636-c3_g1   | 290 | 2861 | -3.302394692 | 0           | 0           |
| TR18093-c0_g1 | 10  | 99   | -3.307428525 | 5.96396E-20 | 2.11982E-18 |
| TR7790-c3_g1  | 272 | 2710 | -3.316614295 | 0           | 0           |
| TR10016-c3_g1 | 66  | 658  | -3.317549654 | 3.0207E-123 | 7.3366E-121 |
| TR11165-c1_g1 | 14  | 140  | -3.321928095 | 1.2161E-27  | 6.38127E-26 |
| TR8525-c0_g1  | 10  | 100  | -3.321928095 | 3.32396E-20 | 1.19982E-18 |
| TR8072-c0_g1  | 4   | 40   | -3.321928095 | 5.76181E-09 | 9.03676E-08 |
| TR7016-c0_g2  | 3   | 30   | -3.321928095 | 4.57548E-07 | 5.60038E-06 |
| TR15119-c0_g1 | 2   | 20   | -3.321928095 | 3.8245E-05  | 0.000335448 |
| TR16497-c0_g1 | 2   | 20   | -3.321928095 | 3.8245E-05  | 0.000335448 |
| TR16497-c0_g4 | 2   | 20   | -3.321928095 | 3.8245E-05  | 0.000335448 |
| TR7795-c0_g1  | 2   | 20   | -3.321928095 | 3.8245E-05  | 0.000335448 |
| TR10962-c0_g1 | 1   | 10   | -3.321928095 | 0.003594212 | 0.017762134 |
| TR14172-c0_g1 | 1   | 10   | -3.321928095 | 0.003594212 | 0.017762134 |
| TR16850-c0_g1 | 1   | 10   | -3.321928095 | 0.003594212 | 0.017762134 |
| TR18509-c0_g1 | 1   | 10   | -3.321928095 | 0.003594212 | 0.017762134 |
| TR21457-c0_g1 | 1   | 10   | -3.321928095 | 0.003594212 | 0.017762134 |
| TR27333-c0_g1 | 1   | 10   | -3.321928095 | 0.003594212 | 0.017762134 |
| TR3894-c0_g1  | 1   | 10   | -3.321928095 | 0.003594212 | 0.017762134 |
| TR5121-c0_g1  | 1   | 10   | -3.321928095 | 0.003594212 | 0.017762134 |
| TR5358-c0_g1  | 1   | 10   | -3.321928095 | 0.003594212 | 0.017762134 |
| TR5469-c0_g2  | 1   | 10   | -3.321928095 | 0.003594212 | 0.017762134 |
| TR4595-c0_g5  | 32  | 322  | -3.330916878 | 1.80607E-61 | 2.22504E-59 |
| TR17568-c3_g1 | 73  | 735  | -3.331775881 | 6.3088E-138 | 1.73E-135   |
| TR11676-c0_g1 | 8   | 82   | -3.357552005 | 5.51447E-17 | 1.67277E-15 |
| TR10291-c1_g2 | 4   | 41   | -3.357552005 | 3.17906E-09 | 5.14256E-08 |
| TR14350-c0_g2 | 3   | 31   | -3.36923381  | 2.51171E-07 | 3.20348E-06 |
| TR19405-c0_g1 | 3   | 31   | -3.36923381  | 2.51171E-07 | 3.20348E-06 |
| TR19751-c0_g1 | 161 | 1672 | -3.376442254 | 0           | 0           |
| TR23997-c0_g1 | 13  | 136  | -3.387023123 | 2.62738E-27 | 1.34141E-25 |
| TR23605-c0_g1 | 11  | 116  | -3.398549376 | 1.36422E-23 | 5.76952E-22 |
| TR4595-c0_g2  | 27  | 287  | -3.410019425 | 5.0996E-56  | 5.85811E-54 |
| TR8018-c0_g2  | 4   | 43   | -3.426264755 | 9.65706E-10 | 1.67363E-08 |

|               |     |      |              |             |             |
|---------------|-----|------|--------------|-------------|-------------|
| TR4595-c0_g4  | 26  | 280  | -3.428843299 | 6.24345E-55 | 6.84819E-53 |
| TR4595-c0_g1  | 22  | 238  | -3.435386145 | 5.00232E-47 | 4.49979E-45 |
| TR6467-c0_g3  | 25  | 275  | -3.459431619 | 2.36802E-54 | 2.5643E-52  |
| TR1120-c0_g1  | 7   | 77   | -3.459431619 | 2.13262E-16 | 6.31661E-15 |
| TR17626-c0_g1 | 4   | 44   | -3.459431619 | 5.31752E-10 | 9.427E-09   |
| TR13731-c0_g6 | 2   | 22   | -3.459431619 | 1.12982E-05 | 0.000109825 |
| TR3885-c0_g1  | 2   | 22   | -3.459431619 | 1.12982E-05 | 0.000109825 |
| TR7829-c0_g1  | 2   | 22   | -3.459431619 | 1.12982E-05 | 0.000109825 |
| TR10729-c0_g2 | 1   | 11   | -3.459431619 | 0.001904776 | 0.010490352 |
| TR13731-c0_g4 | 1   | 11   | -3.459431619 | 0.001904776 | 0.010490352 |
| TR19043-c0_g2 | 1   | 11   | -3.459431619 | 0.001904776 | 0.010490352 |
| TR9830-c0_g1  | 1   | 11   | -3.459431619 | 0.001904776 | 0.010490352 |
| TR9830-c0_g2  | 1   | 11   | -3.459431619 | 0.001904776 | 0.010490352 |
| TR9830-c0_g3  | 1   | 11   | -3.459431619 | 0.001904776 | 0.010490352 |
| TR9830-c0_g4  | 1   | 11   | -3.459431619 | 0.001904776 | 0.010490352 |
| TR9830-c0_g5  | 1   | 11   | -3.459431619 | 0.001904776 | 0.010490352 |
| TR10103-c0_g1 | 23  | 263  | -3.515357033 | 1.08363E-52 | 1.10318E-50 |
| TR5319-c0_g1  | 9   | 103  | -3.516575526 | 1.16029E-21 | 4.54526E-20 |
| TR20309-c0_g1 | 10  | 116  | -3.5360529   | 2.73933E-24 | 1.20653E-22 |
| TR12605-c0_g1 | 23  | 268  | -3.542527234 | 5.75879E-54 | 6.08119E-52 |
| TR27294-c0_g1 | 5   | 60   | -3.584962501 | 1.96551E-13 | 4.78058E-12 |
| TR16937-c0_g1 | 2   | 24   | -3.584962501 | 3.33199E-06 | 3.54716E-05 |
| TR25673-c0_g1 | 2   | 24   | -3.584962501 | 3.33199E-06 | 3.54716E-05 |
| TR8287-c2_g4  | 2   | 24   | -3.584962501 | 3.33199E-06 | 3.54716E-05 |
| TR10150-c0_g1 | 1   | 12   | -3.584962501 | 0.001010874 | 0.006116087 |
| TR10150-c0_g2 | 1   | 12   | -3.584962501 | 0.001010874 | 0.006116087 |
| TR10729-c0_g1 | 1   | 12   | -3.584962501 | 0.001010874 | 0.006116087 |
| TR17186-c0_g1 | 1   | 12   | -3.584962501 | 0.001010874 | 0.006116087 |
| TR17985-c0_g2 | 1   | 12   | -3.584962501 | 0.001010874 | 0.006116087 |
| TR1913-c0_g1  | 1   | 12   | -3.584962501 | 0.001010874 | 0.006116087 |
| TR23268-c0_g2 | 1   | 12   | -3.584962501 | 0.001010874 | 0.006116087 |
| TR25354-c0_g1 | 1   | 12   | -3.584962501 | 0.001010874 | 0.006116087 |
| TR2962-c0_g1  | 1   | 12   | -3.584962501 | 0.001010874 | 0.006116087 |
| TR4706-c0_g1  | 1   | 12   | -3.584962501 | 0.001010874 | 0.006116087 |
| TR9449-c0_g1  | 1   | 12   | -3.584962501 | 0.001010874 | 0.006116087 |
| TR13006-c0_g1 | 3   | 37   | -3.624490865 | 6.78566E-09 | 1.05453E-07 |
| TR8018-c0_g1  | 3   | 37   | -3.624490865 | 6.78566E-09 | 1.05453E-07 |
| TR23984-c0_g1 | 5   | 62   | -3.632268215 | 5.96158E-14 | 1.49271E-12 |
| TR11156-c0_g1 | 23  | 287  | -3.641344971 | 8.05471E-59 | 9.57628E-57 |
| TR4688-c2_g1  | 107 | 1342 | -3.64870197  | 2.0235E-268 | 1.3232E-265 |
| TR15355-c0_g1 | 11  | 138  | -3.649092838 | 3.18971E-29 | 1.7722E-27  |
| TR10536-c0_g1 | 9   | 113  | -3.650253961 | 3.12779E-24 | 1.37407E-22 |
| TR73-c0_g1    | 5   | 63   | -3.655351829 | 3.28192E-14 | 8.39052E-13 |
| TR18750-c0_g1 | 7   | 89   | -3.668378509 | 1.73361E-19 | 6.02732E-18 |

|               |     |      |              |             |             |
|---------------|-----|------|--------------|-------------|-------------|
| TR16449-c0_g1 | 11  | 140  | -3.669851398 | 9.76587E-30 | 5.55293E-28 |
| TR15695-c0_g1 | 4   | 51   | -3.672425342 | 8.06149E-12 | 1.73489E-10 |
| TR8808-c0_g1  | 8   | 103  | -3.686500527 | 2.23909E-22 | 8.99939E-21 |
| TR15021-c0_g1 | 12  | 155  | -3.691161905 | 7.15444E-33 | 4.55562E-31 |
| TR16013-c0_g1 | 5   | 65   | -3.700439718 | 9.9395E-15  | 2.63627E-13 |
| TR3926-c0_g1  | 3   | 39   | -3.700439718 | 2.03031E-09 | 3.35452E-08 |
| TR3084-c0_g1  | 2   | 26   | -3.700439718 | 9.82166E-07 | 1.14214E-05 |
| TR8076-c0_g1  | 2   | 26   | -3.700439718 | 9.82166E-07 | 1.14214E-05 |
| TR10162-c0_g1 | 1   | 13   | -3.700439718 | 0.000537367 | 0.003528759 |
| TR24040-c0_g1 | 1   | 13   | -3.700439718 | 0.000537367 | 0.003528759 |
| TR13403-c0_g1 | 8   | 105  | -3.714245518 | 6.8259E-23  | 2.80991E-21 |
| TR20325-c0_g1 | 9   | 119  | -3.724892762 | 8.90469E-26 | 4.21703E-24 |
| TR10023-c0_g1 | 24  | 320  | -3.736965594 | 1.47986E-66 | 1.95035E-64 |
| TR18330-c0_g1 | 9   | 123  | -3.772589504 | 8.28001E-27 | 4.11612E-25 |
| TR8751-c0_g1  | 2   | 28   | -3.807354922 | 2.89635E-07 | 3.65566E-06 |
| TR17985-c0_g3 | 1   | 14   | -3.807354922 | 0.000286184 | 0.002027853 |
| TR21031-c0_g1 | 1   | 14   | -3.807354922 | 0.000286184 | 0.002027853 |
| TR21036-c0_g1 | 1   | 14   | -3.807354922 | 0.000286184 | 0.002027853 |
| TR25529-c0_g1 | 1   | 14   | -3.807354922 | 0.000286184 | 0.002027853 |
| TR7086-c0_g1  | 1   | 14   | -3.807354922 | 0.000286184 | 0.002027853 |
| TR9143-c0_g1  | 1   | 14   | -3.807354922 | 0.000286184 | 0.002027853 |
| TR12865-c0_g1 | 11  | 155  | -3.816692787 | 1.34193E-33 | 8.80869E-32 |
| TR3950-c0_g1  | 8   | 113  | -3.820178962 | 5.86531E-25 | 2.65208E-23 |
| TR17943-c0_g1 | 15  | 213  | -3.827819025 | 1.30495E-45 | 1.13773E-43 |
| TR13401-c0_g1 | 18  | 258  | -3.841302254 | 5.38984E-55 | 5.98918E-53 |
| TR10339-c0_g1 | 3   | 43   | -3.841302254 | 1.81544E-10 | 3.36954E-09 |
| TR13006-c0_g2 | 3   | 43   | -3.841302254 | 1.81544E-10 | 3.36954E-09 |
| TR10041-c0_g1 | 18  | 261  | -3.857980995 | 9.11784E-56 | 1.03344E-53 |
| TR14350-c0_g1 | 2   | 29   | -3.857980995 | 1.57344E-07 | 2.06888E-06 |
| TR15026-c0_g1 | 2   | 29   | -3.857980995 | 1.57344E-07 | 2.06888E-06 |
| TR25673-c0_g3 | 2   | 29   | -3.857980995 | 1.57344E-07 | 2.06888E-06 |
| TR10116-c0_g1 | 27  | 397  | -3.878107695 | 3.82489E-84 | 6.5685E-82  |
| TR21696-c0_g1 | 226 | 3364 | -3.895783028 | 0           | 0           |
| TR25421-c0_g4 | 4   | 60   | -3.906890596 | 3.63836E-14 | 9.28782E-13 |
| TR9455-c0_g1  | 2   | 30   | -3.906890596 | 8.55078E-08 | 1.15836E-06 |
| TR24430-c0_g1 | 1   | 15   | -3.906890596 | 0.000152712 | 0.001159067 |
| TR5244-c0_g1  | 1   | 15   | -3.906890596 | 0.000152712 | 0.001159067 |
| TR15590-c0_g1 | 3   | 46   | -3.938599455 | 2.96976E-11 | 6.01069E-10 |
| TR21535-c0_g2 | 2   | 31   | -3.95419631  | 4.64883E-08 | 6.56447E-07 |
| TR683-c9_g1   | 145 | 2270 | -3.968567492 | 0           | 0           |
| TR14788-c0_g1 | 4   | 63   | -3.977279923 | 6.01116E-15 | 1.63778E-13 |
| TR1253-c1_g1  | 5   | 80   | -4           | 1.26191E-18 | 4.17395E-17 |
| TR5358-c0_g2  | 1   | 16   | -4           | 8.1658E-05  | 0.000660778 |
| TR13664-c0_g1 | 9   | 145  | -4.009984089 | 1.72233E-32 | 1.0726E-30  |

|               |     |      |              |             |             |
|---------------|-----|------|--------------|-------------|-------------|
| TR662-c0_g1   | 46  | 745  | -4.017534659 | 1.2383E-159 | 4.386E-157  |
| TR7687-c0_g1  | 7   | 114  | -4.025535092 | 5.90487E-26 | 2.80421E-24 |
| TR6743-c0_g5  | 45  | 734  | -4.027783157 | 1.5293E-157 | 5.1999E-155 |
| TR6743-c0_g2  | 53  | 872  | -4.04026387  | 3.9953E-187 | 1.5796E-184 |
| TR13733-c0_g1 | 13  | 214  | -4.041027268 | 2.43557E-47 | 2.20255E-45 |
| TR662-c0_g2   | 53  | 883  | -4.058349173 | 5.9501E-190 | 2.4673E-187 |
| TR6789-c1_g2  | 16  | 269  | -4.071462363 | 2.67984E-59 | 3.20851E-57 |
| TR13240-c0_g1 | 4   | 68   | -4.087462841 | 2.99651E-16 | 8.79874E-15 |
| TR19948-c0_g1 | 4   | 68   | -4.087462841 | 2.99651E-16 | 8.79874E-15 |
| TR11703-c0_g2 | 2   | 34   | -4.087462841 | 7.49348E-09 | 1.16028E-07 |
| TR8751-c0_g2  | 2   | 34   | -4.087462841 | 7.49348E-09 | 1.16028E-07 |
| TR12445-c0_g1 | 1   | 17   | -4.087462841 | 4.3757E-05  | 0.000376672 |
| TR953-c0_g1   | 8   | 137  | -4.098032083 | 3.65805E-31 | 2.19759E-29 |
| TR7798-c0_g1  | 6   | 103  | -4.101538026 | 7.54933E-24 | 3.26587E-22 |
| TR15629-c1_g1 | 126 | 2164 | -4.10220486  | 0           | 0           |
| TR26994-c0_g1 | 12  | 209  | -4.122396631 | 8.65506E-47 | 7.70405E-45 |
| TR10871-c0_g1 | 4   | 70   | -4.129283017 | 9.03969E-17 | 2.72012E-15 |
| TR13730-c1_g1 | 2   | 35   | -4.129283017 | 4.08291E-09 | 6.52396E-08 |
| TR21535-c0_g3 | 2   | 36   | -4.169925001 | 2.22606E-09 | 3.66369E-08 |
| TR22325-c0_g1 | 1   | 18   | -4.169925001 | 2.34985E-05 | 0.000214442 |
| TR10626-c0_g1 | 0   | 9    | -4.169925001 | 0.002788147 | 0.014567361 |
| TR10962-c0_g2 | 0   | 9    | -4.169925001 | 0.002788147 | 0.014567361 |
| TR12712-c0_g1 | 0   | 9    | -4.169925001 | 0.002788147 | 0.014567361 |
| TR13813-c0_g7 | 0   | 9    | -4.169925001 | 0.002788147 | 0.014567361 |
| TR14592-c0_g1 | 0   | 9    | -4.169925001 | 0.002788147 | 0.014567361 |
| TR1467-c0_g2  | 0   | 9    | -4.169925001 | 0.002788147 | 0.014567361 |
| TR16713-c3_g1 | 0   | 9    | -4.169925001 | 0.002788147 | 0.014567361 |
| TR22028-c0_g1 | 0   | 9    | -4.169925001 | 0.002788147 | 0.014567361 |
| TR23698-c6_g2 | 0   | 9    | -4.169925001 | 0.002788147 | 0.014567361 |
| TR24087-c0_g1 | 0   | 9    | -4.169925001 | 0.002788147 | 0.014567361 |
| TR27262-c0_g1 | 0   | 9    | -4.169925001 | 0.002788147 | 0.014567361 |
| TR27339-c0_g1 | 0   | 9    | -4.169925001 | 0.002788147 | 0.014567361 |
| TR4536-c0_g1  | 0   | 9    | -4.169925001 | 0.002788147 | 0.014567361 |
| TR4794-c0_g1  | 0   | 9    | -4.169925001 | 0.002788147 | 0.014567361 |
| TR5666-c0_g1  | 0   | 9    | -4.169925001 | 0.002788147 | 0.014567361 |
| TR6879-c0_g1  | 0   | 9    | -4.169925001 | 0.002788147 | 0.014567361 |
| TR8043-c0_g1  | 0   | 9    | -4.169925001 | 0.002788147 | 0.014567361 |
| TR8199-c0_g2  | 0   | 9    | -4.169925001 | 0.002788147 | 0.014567361 |
| TR9449-c0_g3  | 0   | 9    | -4.169925001 | 0.002788147 | 0.014567361 |
| TR9449-c0_g4  | 0   | 9    | -4.169925001 | 0.002788147 | 0.014567361 |
| TR23278-c0_g1 | 3   | 55   | -4.196397213 | 1.31489E-13 | 3.24455E-12 |
| TR803-c0_g1   | 11  | 202  | -4.198779864 | 1.01049E-45 | 8.85548E-44 |
| TR6789-c1_g1  | 17  | 317  | -4.220876189 | 6.43348E-71 | 9.1914E-69  |
| TR14789-c1_g1 | 150 | 2801 | -4.222907578 | 0           | 0           |

|               |     |      |              |             |             |
|---------------|-----|------|--------------|-------------|-------------|
| TR1653-c0_g1  | 1   | 19   | -4.247927513 | 1.26469E-05 | 0.000121272 |
| TR23200-c0_g1 | 1   | 19   | -4.247927513 | 1.26469E-05 | 0.000121272 |
| TR2420-c0_g2  | 1   | 19   | -4.247927513 | 1.26469E-05 | 0.000121272 |
| TR21026-c0_g2 | 6   | 117  | -4.285402219 | 1.80305E-27 | 9.43209E-26 |
| TR2691-c0_g1  | 353 | 6949 | -4.299065292 | 0           | 0           |
| TR12386-c0_g1 | 1   | 20   | -4.321928095 | 6.82167E-06 | 6.88293E-05 |
| TR10631-c0_g1 | 0   | 10   | -4.321928095 | 0.001465685 | 0.008435542 |
| TR1203-c0_g1  | 0   | 10   | -4.321928095 | 0.001465685 | 0.008435542 |
| TR1305-c0_g2  | 0   | 10   | -4.321928095 | 0.001465685 | 0.008435542 |
| TR14001-c0_g1 | 0   | 10   | -4.321928095 | 0.001465685 | 0.008435542 |
| TR14064-c0_g1 | 0   | 10   | -4.321928095 | 0.001465685 | 0.008435542 |
| TR1431-c0_g1  | 0   | 10   | -4.321928095 | 0.001465685 | 0.008435542 |
| TR1467-c0_g4  | 0   | 10   | -4.321928095 | 0.001465685 | 0.008435542 |
| TR17087-c0_g1 | 0   | 10   | -4.321928095 | 0.001465685 | 0.008435542 |
| TR20056-c0_g1 | 0   | 10   | -4.321928095 | 0.001465685 | 0.008435542 |
| TR2014-c0_g1  | 0   | 10   | -4.321928095 | 0.001465685 | 0.008435542 |
| TR20701-c0_g2 | 0   | 10   | -4.321928095 | 0.001465685 | 0.008435542 |
| TR22909-c0_g1 | 0   | 10   | -4.321928095 | 0.001465685 | 0.008435542 |
| TR23183-c0_g1 | 0   | 10   | -4.321928095 | 0.001465685 | 0.008435542 |
| TR23533-c0_g1 | 0   | 10   | -4.321928095 | 0.001465685 | 0.008435542 |
| TR24061-c0_g1 | 0   | 10   | -4.321928095 | 0.001465685 | 0.008435542 |
| TR25378-c0_g1 | 0   | 10   | -4.321928095 | 0.001465685 | 0.008435542 |
| TR25378-c0_g2 | 0   | 10   | -4.321928095 | 0.001465685 | 0.008435542 |
| TR26518-c0_g6 | 0   | 10   | -4.321928095 | 0.001465685 | 0.008435542 |
| TR27768-c0_g1 | 0   | 10   | -4.321928095 | 0.001465685 | 0.008435542 |
| TR9851-c0_g1  | 0   | 10   | -4.321928095 | 0.001465685 | 0.008435542 |
| TR27760-c0_g1 | 3   | 61   | -4.345774837 | 3.59999E-15 | 9.93581E-14 |
| TR9348-c0_g1  | 3   | 63   | -4.392317423 | 1.08869E-15 | 3.06442E-14 |
| TR1653-c0_g2  | 1   | 21   | -4.392317423 | 3.68772E-06 | 3.89175E-05 |
| TR2420-c0_g1  | 1   | 21   | -4.392317423 | 3.68772E-06 | 3.89175E-05 |
| TR26687-c0_g1 | 1   | 21   | -4.392317423 | 3.68772E-06 | 3.89175E-05 |
| TR5943-c0_g1  | 1   | 21   | -4.392317423 | 3.68772E-06 | 3.89175E-05 |
| TR4656-c0_g1  | 5   | 109  | -4.44625623  | 3.92643E-26 | 1.89174E-24 |
| TR11527-c0_g1 | 0   | 11   | -4.459431619 | 0.000775714 | 0.004880888 |
| TR11703-c0_g1 | 0   | 11   | -4.459431619 | 0.000775714 | 0.004880888 |
| TR1467-c0_g1  | 0   | 11   | -4.459431619 | 0.000775714 | 0.004880888 |
| TR1467-c0_g3  | 0   | 11   | -4.459431619 | 0.000775714 | 0.004880888 |
| TR19043-c0_g1 | 0   | 11   | -4.459431619 | 0.000775714 | 0.004880888 |
| TR2449-c0_g1  | 0   | 11   | -4.459431619 | 0.000775714 | 0.004880888 |
| TR25052-c0_g2 | 0   | 11   | -4.459431619 | 0.000775714 | 0.004880888 |
| TR26036-c0_g2 | 0   | 11   | -4.459431619 | 0.000775714 | 0.004880888 |
| TR3169-c0_g1  | 0   | 11   | -4.459431619 | 0.000775714 | 0.004880888 |
| TR5461-c0_g1  | 0   | 11   | -4.459431619 | 0.000775714 | 0.004880888 |
| TR6229-c0_g1  | 0   | 11   | -4.459431619 | 0.000775714 | 0.004880888 |

|               |    |     |              |             |             |
|---------------|----|-----|--------------|-------------|-------------|
| TR3947-c0_g1  | 2  | 45  | -4.491853096 | 9.79394E-12 | 2.07878E-10 |
| TR19780-c0_g1 | 3  | 68  | -4.502500341 | 5.51971E-17 | 1.67277E-15 |
| TR7352-c0_g1  | 5  | 114 | -4.510961919 | 2.03011E-27 | 1.05228E-25 |
| TR16713-c1_g1 | 3  | 69  | -4.523561956 | 3.04471E-17 | 9.446E-16   |
| TR13813-c0_g4 | 1  | 23  | -4.523561956 | 1.08484E-06 | 1.25383E-05 |
| TR23698-c6_g1 | 12 | 282 | -4.554588852 | 1.55298E-65 | 2.01548E-63 |
| TR10333-c1_g1 | 0  | 12  | -4.584962501 | 0.000413158 | 0.002819846 |
| TR1158-c0_g1  | 0  | 12  | -4.584962501 | 0.000413158 | 0.002819846 |
| TR11670-c0_g1 | 0  | 12  | -4.584962501 | 0.000413158 | 0.002819846 |
| TR11670-c0_g2 | 0  | 12  | -4.584962501 | 0.000413158 | 0.002819846 |
| TR14720-c0_g1 | 0  | 12  | -4.584962501 | 0.000413158 | 0.002819846 |
| TR17594-c0_g1 | 0  | 12  | -4.584962501 | 0.000413158 | 0.002819846 |
| TR18099-c0_g3 | 0  | 12  | -4.584962501 | 0.000413158 | 0.002819846 |
| TR18949-c0_g1 | 0  | 12  | -4.584962501 | 0.000413158 | 0.002819846 |
| TR21535-c0_g1 | 0  | 12  | -4.584962501 | 0.000413158 | 0.002819846 |
| TR23548-c0_g1 | 0  | 12  | -4.584962501 | 0.000413158 | 0.002819846 |
| TR25075-c0_g2 | 0  | 12  | -4.584962501 | 0.000413158 | 0.002819846 |
| TR21026-c0_g1 | 4  | 97  | -4.599912842 | 9.44527E-24 | 4.06537E-22 |
| TR11674-c0_g2 | 1  | 25  | -4.64385619  | 3.21937E-07 | 4.05735E-06 |
| TR10374-c2_g6 | 1  | 26  | -4.700439718 | 1.75945E-07 | 2.28867E-06 |
| TR15442-c0_g1 | 1  | 26  | -4.700439718 | 1.75945E-07 | 2.28867E-06 |
| TR15742-c0_g1 | 1  | 26  | -4.700439718 | 1.75945E-07 | 2.28867E-06 |
| TR11527-c0_g2 | 0  | 13  | -4.700439718 | 0.000221374 | 0.001622963 |
| TR13813-c0_g2 | 0  | 13  | -4.700439718 | 0.000221374 | 0.001622963 |
| TR17257-c0_g2 | 0  | 13  | -4.700439718 | 0.000221374 | 0.001622963 |
| TR20701-c0_g1 | 0  | 13  | -4.700439718 | 0.000221374 | 0.001622963 |
| TR25075-c0_g1 | 0  | 13  | -4.700439718 | 0.000221374 | 0.001622963 |
| TR26518-c0_g2 | 0  | 13  | -4.700439718 | 0.000221374 | 0.001622963 |
| TR26556-c0_g1 | 0  | 13  | -4.700439718 | 0.000221374 | 0.001622963 |
| TR4028-c0_g1  | 0  | 13  | -4.700439718 | 0.000221374 | 0.001622963 |
| TR5605-c0_g1  | 0  | 13  | -4.700439718 | 0.000221374 | 0.001622963 |
| TR5605-c0_g2  | 0  | 13  | -4.700439718 | 0.000221374 | 0.001622963 |
| TR6174-c0_g1  | 0  | 13  | -4.700439718 | 0.000221374 | 0.001622963 |
| TR10085-c1_g2 | 8  | 209 | -4.707359132 | 1.20652E-49 | 1.17214E-47 |
| TR1933-c0_g1  | 7  | 184 | -4.716207034 | 6.0305E-44  | 5.02581E-42 |
| TR11881-c0_g2 | 36 | 965 | -4.744460131 | 5.3702E-223 | 2.5361E-220 |
| TR15004-c0_g1 | 2  | 55  | -4.781359714 | 2.54901E-14 | 6.58609E-13 |
| TR12121-c0_g2 | 8  | 222 | -4.794415866 | 6.04988E-53 | 6.23369E-51 |
| TR17475-c0_g1 | 2  | 56  | -4.807354922 | 1.41242E-14 | 3.70293E-13 |
| TR11583-c0_g1 | 0  | 14  | -4.807354922 | 0.000119286 | 0.000930715 |
| TR16645-c0_g1 | 0  | 14  | -4.807354922 | 0.000119286 | 0.000930715 |
| TR19511-c0_g1 | 0  | 14  | -4.807354922 | 0.000119286 | 0.000930715 |
| TR21514-c1_g1 | 0  | 14  | -4.807354922 | 0.000119286 | 0.000930715 |
| TR9333-c0_g1  | 0  | 14  | -4.807354922 | 0.000119286 | 0.000930715 |

|                |    |      |              |             |             |
|----------------|----|------|--------------|-------------|-------------|
| TR17196-c1_g1  | 4  | 113  | -4.820178962 | 7.75564E-28 | 4.13342E-26 |
| TR9254-c0_g1   | 2  | 57   | -4.832890014 | 7.83309E-15 | 2.10717E-13 |
| TR13436-c0_g1  | 0  | 15   | -4.906890596 | 6.46226E-05 | 0.000534632 |
| TR13803-c1_g1  | 0  | 15   | -4.906890596 | 6.46226E-05 | 0.000534632 |
| TR17336-c0_g1  | 0  | 15   | -4.906890596 | 6.46226E-05 | 0.000534632 |
| TR7065-c0_g2   | 0  | 15   | -4.906890596 | 6.46226E-05 | 0.000534632 |
| TR8490-c0_g1   | 6  | 181  | -4.914883386 | 8.14114E-44 | 6.75171E-42 |
| TR23698-c6_g3  | 5  | 151  | -4.916476644 | 7.63023E-37 | 5.52017E-35 |
| TR3169-c0_g3   | 2  | 61   | -4.930737338 | 7.47405E-16 | 2.13561E-14 |
| TR11224-c19_g1 | 36 | 1108 | -4.943817165 | 5.0007E-259 | 3.0364E-256 |
| TR27757-c0_g1  | 4  | 126  | -4.977279923 | 3.99506E-31 | 2.3916E-29  |
| TR8601-c0_g2   | 12 | 382  | -4.992466327 | 7.77679E-91 | 1.51972E-88 |
| TR8601-c0_g1   | 15 | 479  | -4.99699125  | 1.94E-113   | 4.3976E-111 |
| TR16467-c0_g1  | 4  | 128  | -5           | 1.25373E-31 | 7.61254E-30 |
| TR1180-c0_g1   | 1  | 32   | -5           | 4.89763E-09 | 7.7385E-08  |
| TR13142-c0_g1  | 1  | 32   | -5           | 4.89763E-09 | 7.7385E-08  |
| TR11644-c0_g2  | 0  | 16   | -5           | 3.51878E-05 | 0.000312397 |
| TR14284-c0_g1  | 0  | 16   | -5           | 3.51878E-05 | 0.000312397 |
| TR15608-c0_g1  | 0  | 16   | -5           | 3.51878E-05 | 0.000312397 |
| TR25290-c0_g1  | 0  | 16   | -5           | 3.51878E-05 | 0.000312397 |
| TR594-c0_g1    | 5  | 164  | -5.03562391  | 4.10606E-40 | 3.1026E-38  |
| TR3471-c1_g1   | 5  | 165  | -5.044394119 | 2.30615E-40 | 1.76655E-38 |
| TR7480-c0_g1   | 3  | 99   | -5.044394119 | 6.88331E-25 | 3.10412E-23 |
| TR24887-c0_g1  | 2  | 66   | -5.044394119 | 4.04077E-17 | 1.24454E-15 |
| TR11644-c0_g1  | 0  | 17   | -5.087462841 | 1.92537E-05 | 0.000178873 |
| TR13790-c0_g4  | 0  | 17   | -5.087462841 | 1.92537E-05 | 0.000178873 |
| TR15754-c0_g2  | 0  | 17   | -5.087462841 | 1.92537E-05 | 0.000178873 |
| TR18371-c0_g1  | 0  | 17   | -5.087462841 | 1.92537E-05 | 0.000178873 |
| TR22136-c0_g1  | 0  | 17   | -5.087462841 | 1.92537E-05 | 0.000178873 |
| TR26615-c0_g1  | 0  | 17   | -5.087462841 | 1.92537E-05 | 0.000178873 |
| TR2997-c0_g1   | 0  | 17   | -5.087462841 | 1.92537E-05 | 0.000178873 |
| TR7065-c0_g1   | 0  | 17   | -5.087462841 | 1.92537E-05 | 0.000178873 |
| TR11303-c0_g1  | 6  | 207  | -5.108524457 | 2.47129E-50 | 2.42862E-48 |
| TR6466-c0_g1   | 2  | 70   | -5.129283017 | 3.97566E-18 | 1.28257E-16 |
| TR10289-c1_g2  | 1  | 36   | -5.169925001 | 4.6804E-10  | 8.41152E-09 |
| TR11550-c0_g1  | 0  | 18   | -5.169925001 | 1.05841E-05 | 0.000103297 |
| TR18875-c0_g1  | 0  | 18   | -5.169925001 | 1.05841E-05 | 0.000103297 |
| TR20155-c0_g1  | 0  | 18   | -5.169925001 | 1.05841E-05 | 0.000103297 |
| TR25324-c0_g2  | 0  | 18   | -5.169925001 | 1.05841E-05 | 0.000103297 |
| TR26518-c0_g3  | 0  | 18   | -5.169925001 | 1.05841E-05 | 0.000103297 |
| TR4395-c0_g1   | 0  | 18   | -5.169925001 | 1.05841E-05 | 0.000103297 |
| TR4657-c0_g1   | 0  | 18   | -5.169925001 | 1.05841E-05 | 0.000103297 |
| TR11881-c0_g3  | 1  | 37   | -5.209453366 | 2.61458E-10 | 4.80554E-09 |
| TR26427-c0_g1  | 0  | 19   | -5.247927513 | 5.84421E-06 | 5.95322E-05 |

|               |    |      |              |             |             |
|---------------|----|------|--------------|-------------|-------------|
| TR17194-c0_g1 | 2  | 79   | -5.303780748 | 2.26219E-20 | 8.28305E-19 |
| TR25183-c0_g1 | 5  | 200  | -5.321928095 | 4.75713E-49 | 4.54368E-47 |
| TR15528-c0_g1 | 1  | 40   | -5.321928095 | 4.60764E-11 | 9.07717E-10 |
| TR17091-c0_g1 | 1  | 40   | -5.321928095 | 4.60764E-11 | 9.07717E-10 |
| TR5212-c0_g1  | 1  | 40   | -5.321928095 | 4.60764E-11 | 9.07717E-10 |
| TR15742-c0_g2 | 0  | 20   | -5.321928095 | 3.24081E-06 | 3.4631E-05  |
| TR15754-c0_g1 | 0  | 20   | -5.321928095 | 3.24081E-06 | 3.4631E-05  |
| TR26604-c0_g1 | 0  | 20   | -5.321928095 | 3.24081E-06 | 3.4631E-05  |
| TR15229-c0_g3 | 4  | 167  | -5.383704292 | 2.61584E-41 | 2.08792E-39 |
| TR11674-c0_g1 | 0  | 21   | -5.392317423 | 1.80452E-06 | 2.00256E-05 |
| TR13790-c0_g6 | 0  | 21   | -5.392317423 | 1.80452E-06 | 2.00256E-05 |
| TR1986-c0_g1  | 0  | 21   | -5.392317423 | 1.80452E-06 | 2.00256E-05 |
| TR25321-c1_g1 | 0  | 21   | -5.392317423 | 1.80452E-06 | 2.00256E-05 |
| TR25324-c0_g1 | 0  | 21   | -5.392317423 | 1.80452E-06 | 2.00256E-05 |
| TR23361-c0_g3 | 5  | 218  | -5.44625623  | 1.87195E-53 | 1.94058E-51 |
| TR13813-c0_g8 | 0  | 22   | -5.459431619 | 1.00876E-06 | 1.16827E-05 |
| TR16745-c0_g4 | 0  | 22   | -5.459431619 | 1.00876E-06 | 1.16827E-05 |
| TR17848-c0_g2 | 0  | 22   | -5.459431619 | 1.00876E-06 | 1.16827E-05 |
| TR25319-c0_g2 | 0  | 22   | -5.459431619 | 1.00876E-06 | 1.16827E-05 |
| TR6538-c0_g3  | 0  | 22   | -5.459431619 | 1.00876E-06 | 1.16827E-05 |
| TR7787-c0_g1  | 5  | 221  | -5.465974465 | 3.48408E-54 | 3.7254E-52  |
| TR5496-c0_g2  | 0  | 23   | -5.523561956 | 5.6606E-07  | 6.87412E-06 |
| TR21349-c0_g1 | 6  | 277  | -5.528779665 | 1.61294E-67 | 2.15922E-65 |
| TR8538-c0_g1  | 12 | 557  | -5.536571017 | 7.4332E-134 | 1.9442E-131 |
| TR13472-c0_g1 | 0  | 24   | -5.584962501 | 3.18811E-07 | 4.02093E-06 |
| TR18780-c0_g1 | 1  | 50   | -5.64385619  | 1.57861E-13 | 3.86721E-12 |
| TR25108-c0_g2 | 0  | 25   | -5.64385619  | 1.80196E-07 | 2.34038E-06 |
| TR25321-c0_g1 | 0  | 25   | -5.64385619  | 1.80196E-07 | 2.34038E-06 |
| TR6675-c0_g1  | 1  | 51   | -5.672425342 | 9.02709E-14 | 2.25695E-12 |
| TR24738-c0_g1 | 0  | 26   | -5.700439718 | 1.02198E-07 | 1.37136E-06 |
| TR16525-c0_g1 | 2  | 107  | -5.741466986 | 3.49837E-27 | 1.78075E-25 |
| TR23646-c0_g1 | 3  | 162  | -5.754887502 | 2.74736E-40 | 2.08521E-38 |
| TR23698-c6_g4 | 0  | 27   | -5.754887502 | 5.81548E-08 | 8.0909E-07  |
| TR25108-c0_g1 | 0  | 27   | -5.754887502 | 5.81548E-08 | 8.0909E-07  |
| TR13194-c0_g1 | 0  | 28   | -5.807354922 | 3.31989E-08 | 4.79546E-07 |
| TR9802-c0_g1  | 0  | 28   | -5.807354922 | 3.31989E-08 | 4.79546E-07 |
| TR11881-c0_g1 | 60 | 3436 | -5.839623726 | 0           | 0           |
| TR4168-c0_g1  | 5  | 297  | -5.892391026 | 2.51068E-72 | 3.67973E-70 |
| TR1397-c0_g1  | 0  | 30   | -5.906890596 | 1.09201E-08 | 1.65912E-07 |
| TR10354-c0_g1 | 0  | 31   | -5.95419631  | 6.2909E-09  | 9.82126E-08 |
| TR13730-c1_g3 | 0  | 31   | -5.95419631  | 6.2909E-09  | 9.82126E-08 |
| TR13803-c0_g1 | 0  | 31   | -5.95419631  | 6.2909E-09  | 9.82126E-08 |
| TR495-c0_g1   | 5  | 310  | -5.95419631  | 2.29657E-75 | 3.54952E-73 |
| TR18934-c0_g1 | 1  | 64   | -6           | 7.18654E-17 | 2.16633E-15 |



|               |    |      |              |             |             |
|---------------|----|------|--------------|-------------|-------------|
| TR21409-c0_g2 | 0  | 33   | -6.044394119 | 2.10561E-09 | 3.47218E-08 |
| TR22981-c1_g1 | 8  | 531  | -6.052568051 | 1.5121E-127 | 3.7806E-125 |
| TR24283-c3_g1 | 8  | 537  | -6.068778278 | 6.2663E-129 | 1.5901E-126 |
| TR26441-c0_g1 | 0  | 34   | -6.087462841 | 1.22318E-09 | 2.0775E-08  |
| TR5496-c0_g1  | 0  | 34   | -6.087462841 | 1.22318E-09 | 2.0775E-08  |
| TR14553-c0_g1 | 0  | 35   | -6.129283017 | 7.12445E-10 | 1.24614E-08 |
| TR25319-c0_g1 | 0  | 35   | -6.129283017 | 7.12445E-10 | 1.24614E-08 |
| TR21464-c0_g2 | 0  | 38   | -6.247927513 | 1.42931E-10 | 2.67622E-09 |
| TR27361-c0_g3 | 0  | 38   | -6.247927513 | 1.42931E-10 | 2.67622E-09 |
| TR8835-c0_g1  | 1  | 79   | -6.303780748 | 2.49205E-20 | 9.03372E-19 |
| TR22984-c0_g1 | 2  | 164  | -6.357552005 | 2.30673E-40 | 1.76655E-38 |
| TR16713-c0_g1 | 0  | 42   | -6.392317423 | 1.73539E-11 | 3.57624E-10 |
| TR16623-c0_g2 | 0  | 43   | -6.426264755 | 1.03013E-11 | 2.1729E-10  |
| TR10357-c1_g4 | 0  | 44   | -6.459431619 | 6.12792E-12 | 1.33056E-10 |
| TR14433-c0_g1 | 0  | 45   | -6.491853096 | 3.65295E-12 | 8.08659E-11 |
| TR25264-c0_g1 | 1  | 91   | -6.50779464  | 5.07611E-23 | 2.11004E-21 |
| TR16595-c0_g1 | 0  | 50   | -6.64385619  | 2.8334E-13  | 6.80388E-12 |
| TR16745-c0_g3 | 0  | 50   | -6.64385619  | 2.8334E-13  | 6.80388E-12 |
| TR6538-c0_g2  | 0  | 52   | -6.700439718 | 1.03261E-13 | 2.57038E-12 |
| TR27448-c0_g1 | 1  | 109  | -6.768184325 | 6.01973E-27 | 3.0101E-25  |
| TR12283-c0_g2 | 0  | 56   | -6.807354922 | 1.40094E-14 | 3.68698E-13 |
| TR2816-c0_g1  | 1  | 113  | -6.820178962 | 8.38326E-28 | 4.45395E-26 |
| TR1713-c0_g1  | 0  | 57   | -6.832890014 | 8.53859E-15 | 2.27535E-13 |
| TR21409-c0_g1 | 1  | 120  | -6.906890596 | 2.7432E-29  | 1.52911E-27 |
| TR12283-c0_g1 | 1  | 138  | -7.108524457 | 4.90445E-33 | 3.17042E-31 |
| TR3477-c4_g1  | 12 | 1726 | -7.168254248 | 0           | 0           |
| TR13803-c1_g2 | 0  | 75   | -7.22881869  | 1.48769E-18 | 4.88276E-17 |
| TR947-c4_g1   | 11 | 1736 | -7.302119614 | 0           | 0           |
| TR20214-c0_g4 | 0  | 80   | -7.321928095 | 1.45145E-19 | 5.07748E-18 |
| TR26637-c0_g1 | 0  | 84   | -7.392317423 | 2.304E-20   | 8.40076E-19 |
| TR15034-c0_g1 | 0  | 85   | -7.409390936 | 1.45843E-20 | 5.36692E-19 |
| TR4443-c0_g1  | 0  | 88   | -7.459431619 | 3.72354E-21 | 1.42579E-19 |
| TR2802-c0_g1  | 0  | 91   | -7.50779464  | 9.59866E-22 | 3.76882E-20 |
| TR20214-c0_g2 | 0  | 93   | -7.539158811 | 3.90812E-22 | 1.55605E-20 |
| TR15257-c1_g1 | 0  | 106  | -7.727920455 | 1.24911E-24 | 5.55928E-23 |
| TR14255-c0_g1 | 0  | 121  | -7.918863237 | 1.98461E-27 | 1.03183E-25 |
| TR17031-c0_g1 | 0  | 166  | -8.375039431 | 2.09081E-35 | 1.46886E-33 |
| TR26865-c0_g1 | 0  | 196  | -8.614709844 | 1.91747E-40 | 1.4818E-38  |
| TR8190-c0_g1  | 0  | 225  | -8.813781191 | 3.84363E-45 | 3.3171E-43  |
| TR8214-c0_g1  | 0  | 227  | -8.826548487 | 1.84632E-45 | 1.60153E-43 |
| TR23704-c0_g1 | 0  | 230  | -8.845490051 | 6.16489E-46 | 5.45892E-44 |
| TR10313-c3_g1 | 0  | 2094 | -12.03204573 | 1.7188E-247 | 9.7406E-245 |
| TR10348-c1_g1 | 0  | 3349 | -12.70951466 | 0           | 0           |
