# Supplementary material for: GTP Binding Protein Gtr1 Cooperating with ASF1 Regulates Asexual Development in Stemphylium eturmiunum
Source: MDPI journal article supplement (doi:10.3390/ijms23158355), 2022-07-28
Supplement: s1 [file s1]

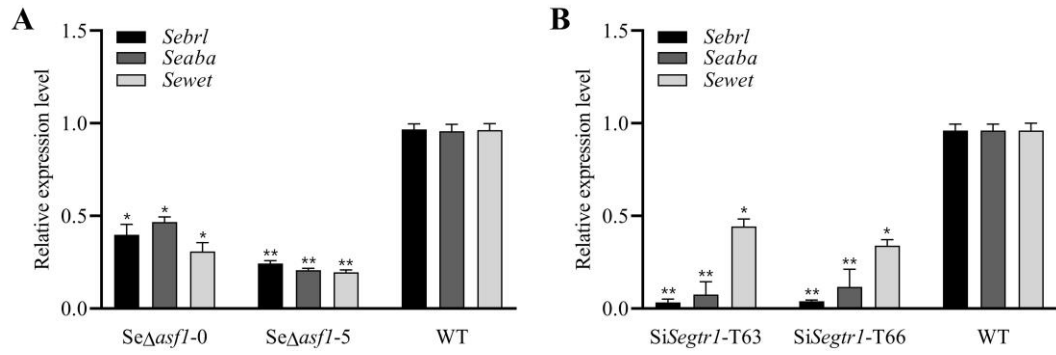

**Figure S1.** The expression patterns of *Sebrl*, *Seaba*, and *Sewet* in knockout mutants or silenced strains. (A) The expression levels of *Sebrl*, *Seaba*, and *Sewet* in two Se $\Delta$ asf1 mutants were measured by qRT-PCR. (B) The expression levels of *Sebrl*, *Seaba*, and *Sewet* in two SiSegtr1 lines were measured by qRT-PCR. The degree of WT was assigned to value 1.0. Two *Seasf1* deleted mutants were Se $\Delta$ asf1-0 and Se $\Delta$ asf1-5, and two *Segtr1*-silenced lines were SiSegtr1-T63 and SiSegtr1-T66. The *Actin* in *S. eturmiunum* was used as endogenous control. The bars indicated statistically significant differences (ANOVA; \* $P < 0.05$ , \*\* $P < 0.01$ ).
